# Supplementary material
Source: ML conference proceedings conference paper supplement (https://openreview.net/forum?id=jNdLszxdtra)
Supplement: supplementary_material [file attachment]

## A Task Description

Table 3: Configuration of environments.

| Environment    | Observation Shape | Action Shape | Have Done | Max Timesteps |
|----------------|-------------------|--------------|-----------|---------------|
| HalfCheetah-v3 | 18                | 6            | False     | 1000          |
| Hopper-v3      | 12                | 3            | True      | 1000          |
| Walker2d-v3    | 18                | 6            | True      | 1000          |
| IB             | 180               | 3            | False     | 1000          |
| FinRL          | 181               | 30           | False     | 2516          |
| CL             | 74                | 14           | False     | 1000          |
| SP             | 4                 | 2            | False     | 50            |

**IB** IB [32] simulates the characteristics presented in various industrial control tasks, such as wind or gas turbines, chemical reactors, etc. The raw system output for each time step is a 6-dimensional vector including velocity, gain, shift, setpoint, consumption, and fatigue. To enhance the Markov property, the authors stitch the system outputs of the last  $K$  timesteps as observations ( $K = 30$  by default). The action space is three-dimensional. Each action can be interpreted as three proposed changes to the three observable state variables called current steerings. Original codes can be found at <https://github.com/siemens/industrialbenchmark>.

**FinRL** FinRL [33] contains 30 stocks in the pool and the trading histories over the past 10 years. Each stock is represented as a 6-dimensional feature vector, where one dimension is the number of stocks currently owned, another five dimensions are the factor information of that stock. The observation has one dimension of information representing the current account cash balance. The dimension of the action space is 30, corresponding to the transactions of each of the thirty stocks. Original codes can be found at <https://github.com/AI4Finance-LLC/FinRL-Library>.

**CityLearn** The CityLearn (CL) environment [34] reshapes the aggregation curve of electricity demand by controlling energy storage in different types of buildings. Domestic hot water (DHW) and solar power demands are modeled in the CL environment. High electricity demand raises the price of electricity and the overall cost of the distribution network. Flattening, smoothing, and narrowing the electricity demand curve help to reduce the operating and capital costs of generation, transmission, and distribution. The observation encodes the states of buildings, including time, outdoor temperature, indoor temperature, humidity, solar radiation, power consumption, charging status of the cooling and heating storage units, etc. The action is to control each building to increase or decrease the amount of energy stored in its own heat storage and cooling equipment. Original codes can be found at <https://github.com/intelligent-environments-lab/CityLearn>.

**SalesPromotion** The SalesPromotion environment simulates a real-world sales promotion platform, where the platform operator (a human with some data analysis tools) delivers different discount coupons to each user to promote the sales. The number of discount coupons delivered to the user is from 0 to 5 each day, and the discount will be in the range  $[0.6, 0.95]$  when the number of coupons is strictly greater than 0. The coupons have the same discount for a user and the user behavior will be affected by the number of coupons and the discount. A higher discount will promote the sales, but the costs will also increase. The goal for the platform operator is to maximize the total income. Although the output of the policy is continuous, we round the dimension that corresponding to the number of coupons to a integer.

To build this environment, the user models in the environment are trained from the real-world platform interactive data, which are collected with over 10,000 users from 19/03/2021 to 17/05/2021 (60 days). Each state (the user state) contains the total orders, the average order from the first day, the average fees from the first day, and the day of the week. The user model takes the first three dims of the user state as the input and outputs the user action, which consists of the number of orders and the average fees of a single day.

We sample 10,000 users to make the offline training dataset, and another 1,000 users to make the offline test dataset. The delivered discount coupons and the user actions are made by the real human operator and real users on the platform. We merge the first 10 days, thus the first day in the offline datasets is 29/03/2021 and the state contains the statistics of the first 10 days. After training the

operator’s policy, it will be tested in the next 30 days starting from 18/05/2021 with the same users. That is, the horizon of the trajectory is 50 for the training and 30 for the test. This setting follows the real-world scenario (also akin to the backtesting in FinRL). The performance of the behavior policy is calculated over the last 50 days in the training dataset, while the performances of Random and Expert policy are testes in the simulator for the next 30 days. After the 50 days promotion, the users tend to spend more on the platform, thus the Random over the next 30 days perform near to the behavior policy over the 50 days. The Expert policy is made by a senior human operator that delivers the same amount and discount to all the users. Since the users’ behavior have changed with the promotion, thus simply imitating the historical promotion actions will fail.

This environment is partly built on our (Polixir Technologies) real-world sales promotion projects. All the offline datasets have gone through the data masking process.

**Gym-MuJoCo** We set `EXCLUDE_CURRENT_POSITIONS_FROM_OBSERVATION` to false to include the first dimension of the position in HalfCheetah-v3, Walker2d-v3, and Hopper-v3. We use Gym-MuJoCo: <https://gym.openai.com/envs/#mujoco>.

The state and action spaces of all environments are summarized in Table 3. Have Done means the respective environment provides a terminal function that will finish the episode before reaching the maximum timesteps. For tasks without the terminal function, the number of samples in the dataset is  $\text{Traj\_Numbers} * \text{Max\_Timesteps}$ . On the other hand, for tasks with a terminal function, i.e. Hopper-v3 and Walker2d-v3, the samples can be fewer. The accurate sample numbers of these two tasks are summarized in Table 4. For domains that provide terminal function, the sample sizes may be less than  $\# \text{Trajectories} \times \text{Max\_Timesteps}$ , so we list the detailed number of samples for these domains in Table 4.

Table 4: Number of samples contained in Hopper and Walker2d datasets.

| Tasks                      | Training Set | Test Set |
|----------------------------|--------------|----------|
| Hopper-v3-Low- $10^2$      | 19259        | 1979     |
| Hopper-v3-Low- $10^3$      | 192346       | 19790    |
| Hopper-v3-Low- $10^4$      | 1918370      | 198188   |
| Hopper-v3-Medium- $10^2$   | 39219        | 2843     |
| Hopper-v3-Medium- $10^3$   | 387466       | 33435    |
| Hopper-v3-Medium- $10^4$   | 3885950      | 315728   |
| Hopper-v3-High- $10^2$     | 42142        | 4086     |
| Hopper-v3-High- $10^3$     | 413793       | 46981    |
| Hopper-v3-High- $10^4$     | 4168323      | 471693   |
| Walker2d-v3-Low- $10^2$    | 55353        | 5521     |
| Walker2d-v3-Low- $10^3$    | 543557       | 49426    |
| Walker2d-v3-Low- $10^4$    | 5455589      | 502659   |
| Walker2d-v3-Medium- $10^2$ | 77738        | 8605     |
| Walker2d-v3-Medium- $10^3$ | 768249       | 86776    |
| Walker2d-v3-Medium- $10^4$ | 7688849      | 867596   |
| Walker2d-v3-High- $10^2$   | 80880        | 7767     |
| Walker2d-v3-High- $10^3$   | 806876       | 83334    |
| Walker2d-v3-High- $10^4$   | 7963782      | 837832   |

## B Additional Comparison Details with Previous Benchmarks

Comparisons with RL Unplugged and D4RL are listed in Table 5.

**Datasets visualization comparisons.** We mainly investigate those seemingly close datasets, i.e., D4RL MuJoCo and NeoRL MuJoCo datasets. During the dataset collection process, D4RL samples from the trained Gaussian policy every step, while NeoRL uses the mean of the Gaussian for 80% steps. Because the performance of D4RL medium lies between the corresponding NeoRL low and medium Gym-MuJoCo datasets, we use UMAP [45] to project the state-action pairs and states on D4RL medium and NeoRL medium to 2D plane and visualize the results in Figure 4, 5, 6.

Table 5: An overview of existing benchmarks with respect to real-world properties. The principal differences are listed, while some common features such as high state and action spaces are omitted.

| Benchmark    | Exclude overly exploratory data | Limited data for all tasks | Compare with working policy | Offline policy validation |
|--------------|---------------------------------|----------------------------|-----------------------------|---------------------------|
| RL Unplugged | ×                               | ×                          | ×                           | ×                         |
| D4RL         | ×                               | ×                          | ×                           | ×                         |
| NeoRL (Ours) | ✓                               | ✓                          | ✓                           | ✓                         |

When plotting Figure 4, the samples of D4RL HalfCheetah-medium task and NeoRL HalfCheetah-medium-1000 task are the same, so they can directly be used with UMAP. For Hopper and Walker2d, we use the first 387,466 and 768,249 samples from D4RL to make the size of samples the same. Figure 4 visualizes the data distribution of D4RL medium tasks and NeoRL low task, where D4RL presents more clusters and covers a wider space for each task than NeoRL. We also visualize the data distribution of D4RL medium and NeoRL medium in the same way in Figure 5. We notice these points do not have too many overlaps, while NeoRL distributes on a smaller space and presents fewer clusters. The reason for few overlaps may be that diverse policies can achieve similar returns in these 3 tasks. Intuitively, a more conservative policy should contain fewer clusters. In the HalfCheetah domain, NeoRL apparently has fewer clusters. Nevertheless, we have to mention again that conservativeness refers to less explorative and commits to the deterministic working policy, which does not necessarily prescribe the policy performance.

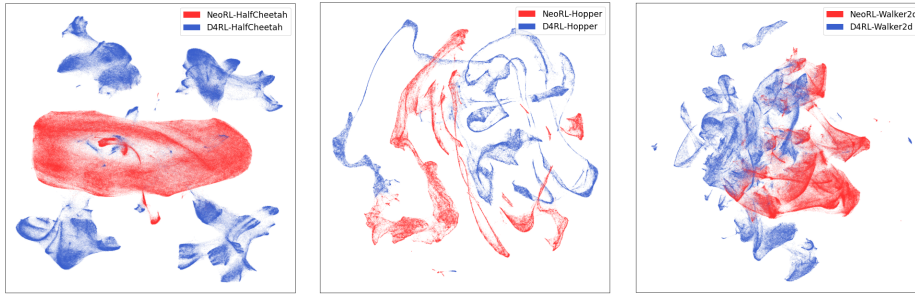

Figure 4: The distribution of state-action pairs of D4RL Gym-MuJoCo medium datasets and NeoRL Gym-MuJoCo low datasets. The domains from left to right are HalfCheetah, Walker2d and Hopper respectively.

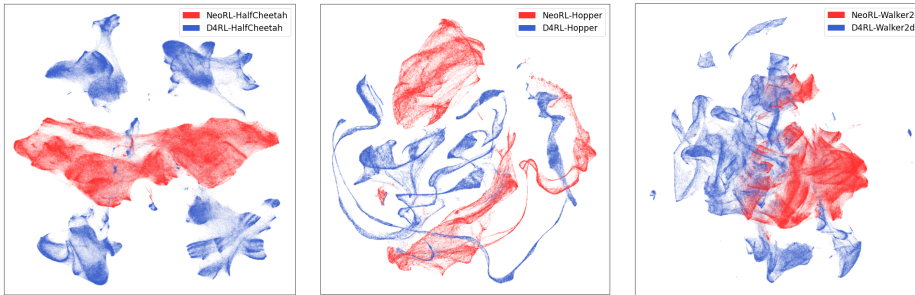

Figure 5: The distribution of state-action pairs on D4RL medium and NeoRL medium. The domains from left to right are HalfCheetah, Walker2d and Hopper respectively.

**OPE comparisons.** DOPE is used to benchmark off-policy policy evaluation methods, where the candidate policies may be online trained or partially offline trained (the authors recorded policy snapshots at exponentially increasing intervals (after 25k learner steps, 50k, 100K, 200K). These candidate policies may have different performances that are distinguishable with OPPE methods. For D4RL, the candidate policies all came from online training snapshots. However, we do not know a priori the online performance of the offline trained policies with different hyper-parameters in different algorithms. The authors may have unintentionally contained candidate policies whose

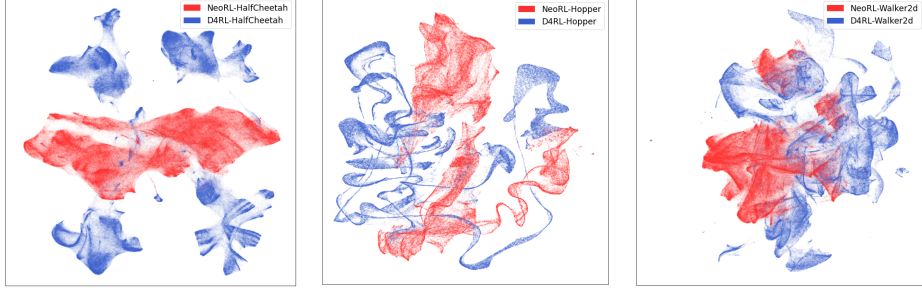

Figure 6: The distribution of states on D4RL medium and NeoRL medium. The domains from left to right are HalfCheetah, Walker2d and Hopper respectively.

performances range from low to high hierarchically and are distinguishable for OPPE methods, thus have weakened the offline policy evaluation challenge especially when all the offline trained policies from an algorithm may perform similarly badly. In fact, OPE methods will easily fail when all the policies are equally bad where an ideal OPE method should give low scores to these policies. Taking Figure 8 as an example, for FQE, it will give policies trained by MOPO notably different evaluations, even though they have very similar ground-truth scores (policies distribute vertically). However, FQE will give similar evaluations to policies trained by CQL on Hopper-medium-1000 task (policies distribute horizontally). Both cases are hazardous for policy validation. In the first case, if we only use FQE to select the best policy, we will get a low-performance trained policy but neglect some better policies obtained from other algorithms or hyper-parameters. In the latter case, FQE cannot distinguish these policies and think they perform the same. This issue also exists for WIS. We also noticed the if candidate policies distribute hierarchically rather than vertically or horizontally, FQE and WIS may help. Besides, the authors used the same datasets to train policies and conduct OPE on RL Unplugged, which can cause biased estimations [15].

## C An Overview of Compared Learning Methods

### C.1 Model-Free Methods

Most algorithms in current offline RL favor a model-free fashion, especially, by extending from off-policy algorithms. Since offline RL is learning from a fixed static dataset, directly utilizing off-policy algorithms will suffer from distribution shift [25] or extrapolation error [12], where the training policies try to reach out-of-data states and actions. For this reason, model-free algorithms usually explicitly or implicitly constrain the learned policy to be close to the offline data [12, 18, 11].

**BC** Behavioral cloning trains a policy to imitate the behavior policy from the data. We treat BC as a baseline of learning methods.

**BCQ** [12] learns a state-conditioned generative model  $G_\omega(s)$ , i.e., VAE, to mimic the behavior policy on the dataset, and a perturbation network  $\xi_\phi(s, a, \Phi)$  to generate actions  $\{a_i = a_i + \xi_\phi(s', a_i, \Phi)\}_{i=1}^n$ , where  $\{a_i \sim G_\omega(s')\}_{i=1}^n$  and the perturbation  $\xi_\phi(s, a, \Phi)$  lies in the range  $[-\Phi, \Phi]$ . Controlling the perturbation amount by a hyper-parameter  $\Phi$ , the learned policy is constrained near the original data.

**PLAS** [18] is an extension of BCQ. Instead of learning a perturbation model on the action space, PLAS learns a deterministic policy on the latent space of VAE and assumes that the latent action space implicitly defines a constraint over the action output, thus the policy selects actions within the support of the dataset during training. In PLAS architecture, actions are decoded from latent actions. An optional perturbation layer can be applied in the PLAS architecture to improve the out-of-data generalization, akin to the perturbation model in BCQ.

**CQL** [11] penalizes the value function for states and actions not supported by the data to prevent overestimation of the training policy. By introducing an extra term under the offline data distribution  $\mathbf{E}_{s \sim \mathbf{D}, a \sim \hat{\pi}_b(s, a)}[Q(s, a)]$ , CQL learns a *conservative* Q function. The authors have also proved this additional term helps achieve a tighter lower bound on the expected Q-value of the training policy  $\pi$ .

**CRR** [17] can be viewed as weighted BC which uses critic function  $f$  to weight  $\log \pi(a|s)$  to discourage  $\pi$  from taking actions that are outside the offline data. Similar approaches include BAIL [46] and ABM [47]. We choose CRR as the representative due to its good performance and robustness to OPE-based offline selection [14].

## C.2 Model-Based Methods

Although model-free methods perform well in offline RL algorithms and are easy to use, an overly constrained policy can hinder stronger results, especially when the data is collected by low-performance behavior policies. On the other hand, model-based methods learn the transition function of the environment, which depends less on the quality of the behavior policy  $\pi_b$ . The transition model takes  $(s, a)$  pair as input and outputs next state  $s'$ , thus online RL algorithms can use these models to perform rollout or plan. However, a learned imperfect model without any safeguards against model inaccuracy can result in *model exploitation* [48, 49].

**BREMEN** [36] uses BC to initialize the policy and uses TRPO [50] to update the policy with ensemble models. The authors proved the total variation of the learned policy and BC initialization grows linearly in terms of TRPO iteration, thus the policy search on a controllable space. Although BREMEN is not tailored towards purely offline, it reduces to purely offline by setting deployment times equal to 1. In this case, it is a straightforward model-based approach.

**MOPO** [27] constructs a pessimistic MDP from the transition models. MOPO uses the ensemble of models to estimate the uncertainty of model predictions. When generating rollouts from the transition models, the reward is penalized by the uncertainty term to encourage the policy to explore states that the transition models are certain about. The similar spirit appears in a concurrent work MOREL [28] which truncates the trajectory when the uncertainty becomes high. However, we had difficulty reproducing the MOREL results on D4RL with the released codes by the authors, so we do not contain it in current experiments.

## D The Results of Verifying Re-implemented Algorithms

The reproducibility issue is critical in offline RL. Even if using codes from the original authors, we may have difficulty reproducing the results for some algorithms on previous benchmarks. Random seeds and which model to keep seem to matter a lot. Since we aim to use the same training workflow, we re-implement compared baselines and have verified our re-implementations on D4RL MuJoCo-medium tasks. The hyper-parameters are set to the recommended values in the original papers. The results are shown in Table 6. Note that, in order to make a fair comparison between BREMEN and MOPO, we use the same implementation of stochastic ensemble models. However, we do notice that the original implementation of BREMEN adopted deterministic models, which may cause a discrepancy in the results. As for MOREL, we first used the codes released by the authors from github, and then we made some code-level optimization to reduce the demanding resources. However, both copies of codes cannot reproduce the original results on D4RL (We used the code by MOREL authors and ran it on D4RL Hopper-v2 medium task, and recorded the average return over the last 100 iterations (the same as the original paper), but only got a raw score of 1873 with the provided parameters (the newest reported result is around 3000)), so currently MOREL is not contained in NeoRL.

Table 6: Normalized scores of the re-implementations on D4RL. Values in the brackets state the reported score in the original papers (except for CRR whose scores on D4RL are not available). The difference between two scores greater than 10 are in bold.

| Task Name          | CQL                | PLAS        | BCQ                | CRR  | BREMEN             | MOPO               |
|--------------------|--------------------|-------------|--------------------|------|--------------------|--------------------|
| Walker2d-medium    | <b>78.5</b> (58.0) | 70.9 (66.9) | <b>69.0</b> (53.1) | 30.2 | <b>29.8</b> (59.6) | <b>27.6</b> (14.0) |
| Hopper-medium      | 78.3 (79.2)        | 34.2 (36.9) | <b>32.0</b> (54.5) | 53.3 | <b>29.7</b> (69.3) | 21.9 (26.5)        |
| HalfCheetah-medium | 41.5 (44.4)        | 40.9 (42.2) | 43.2 (40.7)        | 39.8 | 50.2 (55.0)        | 39.3 (40.2)        |

## E Computation Resources

We ran all the experiments on the local clusters with multiple NVIDIA Telsa V100 GPUs (each cluster consists of 4 GPUs and 40 CPU threads). We used up to 40 GPUs at most. while most of the time, we used about 8 GPUs. With three random seeds, training all the offline policies require 21,420 GPU hours, and evaluating them with OPEs requires 15,300 GPU hours.

## F Choice of Hyper-parameters

To make a fair comparison, all the policies and value functions are implemented by the same network structure, i.e., an MLP with 2 hidden layers and 256 units per layer. Because network architecture search (NAS) consumes large computation resources, especially in offline RL, since it takes a long time to train a policy and the ground-truth performance relies on online interactions. Thus, we directly use the same network architecture as the behavior policy that produced the datasets, and they do learn something in the online training process. We hope future work will enrich the property network architecture for offline RL. The output of the policies is transformed by  $\tanh$  function to ensure the actions are within the range. For model-based approaches, the transition model is represented by an ensemble of Gaussian models, i.e., for each model,  $s_{t+1} \sim \mathcal{N}(s_t + \Delta_\theta(s_t, a_t), \sigma_\theta(s_t, a_t))$ , where  $\Delta_\theta$  and  $\sigma_\theta$  are implemented by an MLP with 4 hidden layers and two heads. For Gym-MoJuCo tasks, we use 256 units in each hidden layer, for other tasks with higher input dimensions, we use 1024 units. Each transition model is trained by Adam optimizer via maximum likelihood until the MSE plateaus on the test dataset.

For BC, the policies are trained by Adam optimizer with a learning rate of 1e-3 for 100K steps with a batch size of 256, and it is early stopped with the lowest MSE on the test dataset to prevent overfitting. Although the best policy may get from the middle of the training process, except for BC, there does not exist a decent criterion to early stop. Thus, we only consider the finally trained policy for evaluation.

For BREMEN, we follow the original settings to treat 25 TRPO steps as an epoch and train for 250 epochs. For other methods, we treat 1000 learning steps as an epoch and then train BCQ, PLAS, CRR, MOPO for 200 epochs and train CQL for 300 epochs (The original CQL used 3000 epochs, but it spends too much time and the best performance can occur before 300 epochs).

Except for BC, offline RL algorithms can be very sensitive to the choice of hyper-parameters. To evaluate the performance of these algorithms, we conduct grid searches for the important hyper-parameters noted by the original papers. The search space of these algorithms is summarized in Table 7 and the hyper-parameters used in the reported results are summarized in Table 8. For parameters not mentioned, their values are the same as the original papers.

Table 7: The search space of hyper-parameters.

| Algorithms | Search Space                                                                                                           |
|------------|------------------------------------------------------------------------------------------------------------------------|
| BCQ        | $\Phi \in \{0.05, 0.1, 0.2, 0.5\}$                                                                                     |
| PLAS       | $\Phi \in \{0, 0.05, 0.1, 0.2, 0.5\}$                                                                                  |
| CQL        | variant $\in \{\mathcal{H}, \rho\}$<br>$\alpha \in \{5, 10\}$<br>$\tau \in \{-1, 2, 5, 10\}$                           |
| CRR        | advantage mode $\in \{\max, \text{mean}\}$<br>weight mode $\in \{\text{exp}, \text{binary}\}$                          |
| BREMEN     | $h \in \{250, 1000\}$<br>exploration mode $\in \{\text{sample}, \text{static}\}$                                       |
| MOPO       | uncertainty type $\in \{\text{aleatoric}, \text{disagreement}\}$<br>$h \in \{1, 5\}$<br>$\lambda \in \{0.5, 1, 2, 5\}$ |

Table 8: Hyper-parameters for reported results.

| Task Name             | BCQ    | PLAS   | CQL           |          |        | CRR            |             | BREMEN |                  | MOPO             |     |           |
|-----------------------|--------|--------|---------------|----------|--------|----------------|-------------|--------|------------------|------------------|-----|-----------|
|                       | $\Phi$ | $\Phi$ | Variant       | $\alpha$ | $\tau$ | Advantage Mode | Weight Mode | $h$    | Exploration Mode | Uncertainty Type | $h$ | $\lambda$ |
| HalfCheetah-L- $10^2$ | 0.05   | 0.05   | $\mathcal{H}$ | 5        | 2      | mean           | exp         | 250    | sample           | aleatoric        | 5   | 1.0       |
| HalfCheetah-L- $10^3$ | 0.2    | 0.05   | $\mathcal{H}$ | 10       | 10     | mean           | exp         | 250    | sample           | aleatoric        | 5   | 1.0       |
| HalfCheetah-L- $10^4$ | 0.5    | 0.05   | $\mathcal{H}$ | 5        | 10     | max            | binary      | 250    | sample           | disagreement     | 1   | 1.0       |
| HalfCheetah-M- $10^2$ | 0.05   | 0.0    | $\rho$        | 10       | -1     | mean           | binary      | 1000   | sample           | aleatoric        | 5   | 1.0       |
| HalfCheetah-M- $10^3$ | 0.05   | 0.0    | $\rho$        | 5        | -1     | mean           | binary      | 250    | sample           | aleatoric        | 5   | 2.0       |
| HalfCheetah-M- $10^4$ | 0.05   | 0.0    | $\mathcal{H}$ | 10       | 5      | mean           | binary      | 250    | sample           | disagreement     | 1   | 5.0       |
| HalfCheetah-H- $10^2$ | 0.05   | 0.0    | $\rho$        | 5        | 10     | max            | exp         | 1000   | sample           | aleatoric        | 5   | 5.0       |
| HalfCheetah-H- $10^3$ | 0.05   | 0.0    | $\rho$        | 5        | 10     | mean           | binary      | 1000   | sample           | aleatoric        | 5   | 2.0       |
| HalfCheetah-H- $10^4$ | 0.05   | 0.0    | $\rho$        | 10       | -1     | mean           | binary      | 1000   | static           | aleatoric        | 1   | 1.0       |
| Hopper-L- $10^2$      | 0.1    | 0.1    | $\mathcal{H}$ | 5        | 10     | max            | binary      | 250    | static           | aleatoric        | 1   | 1.0       |
| Hopper-L- $10^3$      | 0.1    | 0.5    | $\mathcal{H}$ | 5        | 10     | mean           | exp         | 250    | static           | disagreement     | 5   | 5.0       |
| Hopper-L- $10^4$      | 0.2    | 0.2    | $\mathcal{H}$ | 5        | 10     | max            | exp         | 250    | static           | disagreement     | 1   | 0.5       |
| Hopper-M- $10^2$      | 0.1    | 0.0    | $\rho$        | 10       | 10     | mean           | binary      | 1000   | static           | aleatoric        | 1   | 5.0       |
| Hopper-M- $10^3$      | 0.05   | 0.1    | $\mathcal{H}$ | 10       | -1     | max            | exp         | 250    | static           | disagreement     | 5   | 5.0       |
| Hopper-M- $10^4$      | 0.05   | 0.05   | $\mathcal{H}$ | 5        | 10     | mean           | exp         | 250    | static           | aleatoric        | 5   | 1.0       |
| Hopper-H- $10^2$      | 0.05   | 0.0    | $\rho$        | 5        | 10     | mean           | exp         | 250    | static           | aleatoric        | 1   | 0.5       |
| Hopper-H- $10^3$      | 0.2    | 0.0    | $\rho$        | 10       | -1     | mean           | binary      | 250    | static           | aleatoric        | 1   | 5.0       |
| Hopper-H- $10^4$      | 0.05   | 0.0    | $\mathcal{H}$ | 5        | -1     | mean           | binary      | 1000   | static           | disagreement     | 1   | 0.5       |
| Walker2d-L- $10^2$    | 0.05   | 0.0    | $\rho$        | 10       | 2      | mean           | exp         | 1000   | static           | disagreement     | 1   | 0.5       |
| Walker2d-L- $10^3$    | 0.2    | 0.0    | $\mathcal{H}$ | 5        | 10     | mean           | binary      | 1000   | static           | aleatoric        | 1   | 5.0       |
| Walker2d-L- $10^4$    | 0.05   | 0.0    | $\mathcal{H}$ | 10       | 5      | max            | exp         | 1000   | static           | aleatoric        | 1   | 0.5       |
| Walker2d-M- $10^2$    | 0.1    | 0.0    | $\mathcal{H}$ | 5        | -1     | max            | binary      | 1000   | static           | aleatoric        | 5   | 5.0       |
| Walker2d-M- $10^3$    | 0.2    | 0.0    | $\mathcal{H}$ | 10       | 2      | mean           | binary      | 1000   | static           | aleatoric        | 5   | 5.0       |
| Walker2d-M- $10^4$    | 0.05   | 0.0    | $\rho$        | 5        | -1     | mean           | binary      | 1000   | static           | aleatoric        | 5   | 2.0       |
| Walker2d-H- $10^2$    | 0.05   | 0.0    | $\rho$        | 5        | -1     | mean           | exp         | 1000   | static           | disagreement     | 1   | 2.0       |
| Walker2d-H- $10^3$    | 0.2    | 0.0    | $\rho$        | 5        | -1     | mean           | binary      | 1000   | static           | disagreement     | 1   | 2.0       |
| Walker2d-H- $10^4$    | 0.1    | 0.0    | $\rho$        | 10       | -1     | mean           | binary      | 250    | static           | disagreement     | 5   | 1.0       |
| IB-L- $10^2$          | 0.5    | 0.05   | $\rho$        | 10       | 10     | mean           | exp         | 1000   | sample           | aleatoric        | 5   | 5.0       |
| IB-L- $10^3$          | 0.5    | 0.2    | $\rho$        | 5        | 5      | mean           | exp         | 250    | sample           | disagreement     | 5   | 5.0       |
| IB-L- $10^4$          | 0.5    | 0.05   | $\rho$        | 10       | -1     | mean           | binary      | 250    | static           | aleatoric        | 5   | 2.0       |
| IB-M- $10^2$          | 0.5    | 0.5    | $\mathcal{H}$ | 10       | 2      | mean           | exp         | 250    | static           | aleatoric        | 1   | 2.0       |
| IB-M- $10^3$          | 0.2    | 0.0    | $\mathcal{H}$ | 5        | 5      | max            | exp         | 1000   | static           | aleatoric        | 1   | 0.5       |
| IB-M- $10^4$          | 0.5    | 0.0    | $\mathcal{H}$ | 5        | 2      | max            | binary      | 250    | static           | disagreement     | 1   | 1.0       |
| IB-H- $10^2$          | 0.5    | 0.2    | $\rho$        | 10       | 5      | mean           | exp         | 250    | static           | disagreement     | 5   | 2.0       |
| IB-H- $10^3$          | 0.05   | 0.5    | $\rho$        | 5        | 2      | mean           | exp         | 250    | static           | aleatoric        | 1   | 1.0       |
| IB-H- $10^4$          | 0.1    | 0.05   | $\rho$        | 10       | 5      | mean           | exp         | 250    | static           | aleatoric        | 5   | 2.0       |
| FinRL-L- $10^2$       | 0.5    | 0.5    | $\mathcal{H}$ | 5        | 2      | mean           | binary      | 250    | static           | aleatoric        | 1   | 0.5       |
| FinRL-L- $10^3$       | 0.5    | 0.2    | $\mathcal{H}$ | 10       | -1     | max            | exp         | 250    | sample           | aleatoric        | 1   | 0.5       |
| FinRL-M- $10^2$       | 0.1    | 0.5    | $\rho$        | 10       | 2      | mean           | binary      | 250    | static           | aleatoric        | 1   | 0.5       |
| FinRL-M- $10^3$       | 0.5    | 0.0    | $\rho$        | 10       | 10     | max            | exp         | 1000   | sample           | aleatoric        | 5   | 0.5       |
| FinRL-H- $10^2$       | 0.5    | 0.0    | $\mathcal{H}$ | 5        | 10     | max            | exp         | 250    | sample           | aleatoric        | 5   | 0.5       |
| FinRL-H- $10^3$       | 0.5    | 0.2    | $\rho$        | 10       | -1     | mean           | exp         | 250    | sample           | aleatoric        | 1   | 0.5       |
| CL-L- $10^2$          | 0.05   | 0.0    | $\mathcal{H}$ | 10       | 10     | mean           | binary      | 1000   | static           | disagreement     | 1   | 5.0       |
| CL-L- $10^3$          | 0.2    | 0.05   | $\mathcal{H}$ | 10       | -1     | mean           | binary      | 250    | static           | disagreement     | 1   | 2.0       |
| CL-L- $10^4$          | 0.1    | 0.1    | $\mathcal{H}$ | 10       | -1     | mean           | exp         | 1000   | sample           | aleatoric        | 5   | 1.0       |
| CL-M- $10^2$          | 0.2    | 0.05   | $\rho$        | 10       | 10     | mean           | exp         | 250    | static           | disagreement     | 5   | 0.5       |
| CL-M- $10^3$          | 0.2    | 0.0    | $\mathcal{H}$ | 10       | 2      | max            | binary      | 1000   | sample           | aleatoric        | 1   | 0.5       |
| CL-M- $10^4$          | 0.05   | 0.1    | $\mathcal{H}$ | 10       | 10     | max            | exp         | 250    | static           | aleatoric        | 1   | 5.0       |
| CL-H- $10^2$          | 0.05   | 0.0    | $\rho$        | 10       | 2      | mean           | exp         | 250    | static           | disagreement     | 5   | 0.5       |
| CL-H- $10^3$          | 0.1    | 0.0    | $\mathcal{H}$ | 10       | 10     | mean           | exp         | 250    | static           | aleatoric        | 5   | 1.0       |
| CL-H- $10^4$          | 0.05   | 0.0    | $\mathcal{H}$ | 10       | 2      | mean           | exp         | 250    | static           | aleatoric        | 5   | 5.0       |
| SP-Human- $10^4$      | 0.2    | 0.05   | $\mathcal{H}$ | 5        | -1     | mean           | binary      | 1000   | static           | disagreement     | 1   | 5.0       |

For BCQ, the action is decoded from VAE plus a perturbation, i.e.,  $a = \hat{a} + \Phi \tanh(\xi_\phi(s, \hat{a}))$ . Here,  $\Phi$  controls the maximum deviation allowed for the learned policy from the behavior policy. We search for  $\Phi \in \{0.05, 0.1, 0.2, 0.5\}$ .

For PLAS, the default setting is to learn a deterministic policy in the latent space of VAE. The authors mentioned that a similar perturbation layer as BCQ can be applied to the output action to improve its generalization out of the dataset. Thus, we search for the value of  $\Phi \in \{0, 0.05, 0.1, 0.2, 0.5\}$ , where  $\Phi = 0$  stands for the perturbation is not applied.

For CQL, we mainly consider three parameters mentioned in the original paper:

- Variant: The paper proposed two variants of CQL algorithms, i.e.,  $\text{CQL}(\mathcal{H})$  and  $\text{CQL}(\rho)$ . The former uses entropy as the regularizer, whereas the latter uses KL-divergence.
- Q-values penalty parameter  $\alpha$ : In the formulation of CQL,  $\alpha$  stands for how large penalty will be enforced on the Q function. As suggested in the original paper, we search for  $\alpha \in \{5, 10\}$ .
- $\tau$ : Since  $\alpha$  can be hard to tune, the authors also introduce an auto-tuning trick via dual gradient-descent. The trick introduces a threshold  $\tau > 0$ . When the difference between Q-values is greater than  $\tau$ ,  $\alpha$  will be auto-tuned to a greater value to make the penalty more aggressive. As suggested by the paper, we search  $\tau \in \{-1, 2, 5, 10\}$ .  $\tau = -1$  indicates removing this trick.

Note that, there is an approximate-max backup trick mentioned in the original paper. By default, the bellman backup is computed with double Q, i.e.,  $y = r + \min_{i=1,2} Q_i(s', a')$ , where  $a' \sim \pi(s')$ . In addition, the authors propose a approximate-max backup, which use 10 samples to approximate the max Q-values, where the backup is computed by  $y = r + \min_{i=1,2} \max_{a'_1 \dots a'_{10} \sim \pi(s')} Q_i(s', a')$ . In the former experiments, we found this trick impairs the performance. Thus, we keep the double-Q target to reduce the search space.

For CRR, the policy is learned via  $\arg \max_{\pi} \mathbb{E}_{(s,a) \sim D} [f(Q_\theta, \pi, s, a) \log \pi(a|s)]$ , where  $f$  is the weight function that is non-negative and monotonous in Q value. The authors mainly use the advantage function to compute  $f$ . There are mainly two design choices that effect  $f$ :

- Advantage mode: The original paper gives two methods to estimate the advantage function, i.e.,  $\hat{A}_{\text{mean}}(s, a) = Q_\theta(s, a) - \frac{1}{m} \sum_{i=1}^m Q_\theta(s, a_i)$  and  $\hat{A}_{\text{max}}(s, a) = Q_\theta(s, a) - \max_{i=1 \dots m} Q_\theta(s, a_i)$ , where  $a_i \sim \pi(a|s)$ . The former one is termed as *mean* and the later one is termed *max*.
- Weight mode: The original paper gives two ways to compute weight given advantage, i.e.,  $f := \mathbb{1} [\hat{A}(s, a) > 0]$  and  $f := \exp(\hat{A}(s, a)/\beta)$ . The former one is termed as *binary* while the later one is termed *exp*. For the *exp* method, the  $\beta$  is set to 1 to be align with the original paper.

For BREMEN, we consider two parameters mentioned in the original paper:

- Rollout horizon  $h$ : BREMEN uses the transition models to generate imaginary rollouts whose length is controlled by parameter  $h$ . As suggested in the original paper, we search for  $h \in \{250, 1000\}$ .
- Exploration Mode: In the original paper, the authors conducted an ablation study on the exploration strategy when generating rollouts. They found using a stationary Gaussian noise with  $\sigma = 0.1$  other than sampling from the policy can significantly boost the performance. However, in our experiment, we observe that using stationary noise does not always help. Thus, we perform a search on this strategy. The term *sample* is referred to directly sample from the policy, while *static* is referred to the stationary noise suggested by the authors.

For MOPO, we consider three parameters mentioned in the original paper:

- Uncertainty type: In the default setting, MOPO uses the maximum  $L_2$ -norm of the output standard deviation among ensemble transition models, i.e.,  $\max_{i=1 \dots N} \|\sigma_\theta^i(s, a)\|_2^2$ , as the uncertainty measure. Since the learned variance can theoretically recover the true aleatoric uncertainty [41, 27], we denote this type of uncertainty as aleatoric. Another



variant that uses the disagreement between ensemble transition models is also included, i.e.,  $\max_{i=1\dots N} \|\Delta_{\theta}^i(s, a) - \frac{1}{N} \sum_i \Delta_{\theta}^i(s, a)\|_2^2$ . We refer to this variant as disagreement.

- Rollout horizon  $h$ : MOPO uses a branch rollout trick that rollouts from states in the dataset with a small length.  $h$  determines the length of the rollout. As suggested in the paper, we search for  $h \in \{1, 5\}$ .
- Uncertainty penalty weight  $\lambda$ : The main idea of MOPO is to penalize the reward function with the uncertainty term, i.e.,  $\hat{r} = r - \lambda u(s, a)$ . Here,  $\lambda$  control the amplitude of the penalty. As suggested in the original paper, we search for  $\lambda \in \{0.5, 1, 2, 5\}$ .

## G Details of Offline Policy Evaluation

This section describes implementation details and hyper-parameters for offline evaluation and provides additional results. Corresponding to supervised learning, all the OPE methods are conducted on the holdout test dataset with a discount factor  $\gamma = 0.99$ .

For FQE, we follow the hyper-parameters in [14]. The critic network is implemented with an MLP of 4 layers with 1024 units per layer and is trained for  $250K$  steps by Adam optimizer with a batch size of 256. In the experiment, we observe that FQE is inclined to explode to extremely large values. Therefore, we use a value clipping trick on the target of bellman backups. The max and min values are computed by the rewards from the dataset with 40% enlargement of the interval. That is,  $v_{\max} = (1.2r_{\max} - 0.2r_{\min})/(1 - \gamma)$  and  $v_{\min} = (1.2r_{\min} - 0.2r_{\max})/(1 - \gamma)$ .

IS based methods rely on the probability density function of policies to compute the important ratio  $\rho = \frac{\pi(a|s)}{\pi_b(a|s)}$ . However, the behavior policy  $\pi_b(a|s)$  is unknown in the offline setting, and the target policy  $\pi(a|s)$ , i.e., the one trained by offline RL algorithms, can also be deterministic or stochastic with implicit distribution, as in BCQ and PLAS. Thus, we adopt BC to estimate the density function of the respective policy. For the behavior policy, BC is directly applied to the raw dataset. For the target policy, we first relabel the dataset by the output of the target policy, then apply BC on the relabeled dataset. We follow [51] to implement the WIS. The policy is implemented as a TanhGaussian distribution in BC with an MLP of 2 layers and 256 units per layer.

Besides directly selecting the best policy according to the OPE estimations, we also consider other two metrics to evaluate the OPE methods as in [14, 6]:

**Rank Correlation Score (RC Score):** RC score indicates how the OPE produces the same rank as the ground-truth in the online evaluation. It is computed as Spearman correlation coefficient between the two rankings produced by OPE and online evaluation respectively. RC score lies in  $[-1, 1]$ , and if the rank is uniformly random, the score will be 0.

**Top- $K$  Score:** Top- $K$  score represents the relative performance of the chosen  $K$  policies via OPE. To compute this score, the real online performance of each policy is first normalized to a score within  $[0, 1]$  by the min and max values over the whole candidate policy set of all the algorithms. Let  $\pi_{\text{off}}^k$  denote the  $k$ -th ranked policy by the offline evaluation, then we use  $\frac{1}{K} \sum_{k=1}^K \pi_{\text{off}}^k$  and  $\max_k \{\pi_{\text{off}}^k\}$  as the mean and max top- $K$  score respectively. We report the scores with  $K \in \{1, 3, 5\}$ .

In addition, we report the average performance of the candidate policies as policy mean scores. Note that, it also represents the expectation of the top-1 score for a random selection method. All the metrics are shown from Table 9 to 20 for each domain and corresponding OPE method. Follow [14], we also plot the figures of estimated values and actual values for each task on whole candidate policies, from Figure 7 to 24. The estimate vs ground-truth returns compare the estimated values from OPEs against the ground-truth values for every policy. The ground-truth is estimated by the online performance, i.e.,  $v_{\text{gt}} = \frac{R_{\text{online}}}{(1-\gamma)h_{\max}}$ , where  $h_{\max}$  denotes the maximum horizon of the environment. Dots on the dashed line indicates the OPE methods perfectly predict the online performance. We found the FQE and WIS estimation can be far from the real online performance in most tasks. Especially, we can identify a vertical line on the left in most of the estimate vs ground-truth returns of FQE, which indicates FQE fails to evaluate policies with very bad performance.

Table 9: FQE performance on the policies from HalfCheetah tasks. L, M, H stands for low, medium and high quality of dataset.

| Task                          | RC Score     | Top-1 Mean Score | Top-3 Mean Score | Top-5 Mean Score | Top-1 Max Score | Top-3 Max Score | Top-5 Max Score | Policy Mean Score |
|-------------------------------|--------------|------------------|------------------|------------------|-----------------|-----------------|-----------------|-------------------|
| HalfCheetah-L-10 <sup>2</sup> | -.122 ± .007 | .834 ± .007      | .787 ± .000      | .771 ± .000      | .834 ± .007     | .839 ± .000     | .839 ± .000     | 0.701             |
| HalfCheetah-L-10 <sup>3</sup> | .306 ± .036  | .586 ± .000      | .804 ± .001      | .785 ± .065      | .586 ± .000     | .936 ± .003     | .980 ± .028     | 0.724             |
| HalfCheetah-L-10 <sup>4</sup> | .631 ± .052  | .621 ± .439      | .697 ± .275      | .730 ± .124      | .621 ± .439     | .932 ± .000     | .932 ± .000     | 0.700             |
| HalfCheetah-M-10 <sup>2</sup> | -.636 ± .009 | .730 ± .000      | .741 ± .041      | .724 ± .085      | .730 ± .000     | .884 ± .021     | .899 ± .000     | 0.649             |
| HalfCheetah-M-10 <sup>3</sup> | .024 ± .030  | .640 ± .195      | .620 ± .105      | .581 ± .043      | .640 ± .195     | .807 ± .134     | .807 ± .134     | 0.683             |
| HalfCheetah-M-10 <sup>4</sup> | .382 ± .016  | .449 ± .007      | .481 ± .030      | .499 ± .017      | .449 ± .007     | .537 ± .083     | .622 ± .046     | 0.634             |
| HalfCheetah-H-10 <sup>2</sup> | -.295 ± .021 | .518 ± .190      | .418 ± .079      | .459 ± .065      | .518 ± .190     | .653 ± .001     | .738 ± .059     | 0.468             |
| HalfCheetah-H-10 <sup>3</sup> | -.207 ± .028 | .760 ± .103      | .441 ± .146      | .429 ± .145      | .760 ± .103     | .795 ± .089     | .795 ± .089     | 0.533             |
| HalfCheetah-H-10 <sup>4</sup> | .204 ± .005  | .363 ± .000      | .333 ± .015      | .316 ± .008      | .363 ± .000     | .363 ± .000     | .363 ± .000     | 0.467             |
| Average                       | .032 ± .369  | .611 ± .226      | .591 ± .202      | .588 ± .179      | .611 ± .226     | .750 ± .193     | .775 ± .187     | .618 ± .096       |

Table 10: IS performance on the policies from HalfCheetah tasks. L, M, H stands for low, medium and high quality of dataset.

| Task                          | RC Score     | Top-1 Mean Score | Top-3 Mean Score | Top-5 Mean Score | Top-1 Max Score | Top-3 Max Score | Top-5 Max Score | Policy Mean Score |
|-------------------------------|--------------|------------------|------------------|------------------|-----------------|-----------------|-----------------|-------------------|
| HalfCheetah-L-10 <sup>2</sup> | .039 ± .242  | .689 ± .044      | .729 ± .053      | .732 ± .058      | .689 ± .044     | .855 ± .133     | .915 ± .062     | 0.701             |
| HalfCheetah-L-10 <sup>3</sup> | -.309 ± .034 | .658 ± .069      | .649 ± .052      | .642 ± .006      | .658 ± .069     | .718 ± .017     | .742 ± .000     | 0.724             |
| HalfCheetah-L-10 <sup>4</sup> | -.446 ± .015 | .457 ± .333      | .418 ± .045      | .511 ± .026      | .457 ± .333     | .654 ± .094     | .746 ± .067     | 0.700             |
| HalfCheetah-M-10 <sup>2</sup> | .215 ± .068  | .764 ± .100      | .653 ± .116      | .664 ± .104      | .764 ± .100     | .789 ± .083     | .802 ± .080     | 0.649             |
| HalfCheetah-M-10 <sup>3</sup> | .218 ± .099  | .540 ± .254      | .633 ± .126      | .642 ± .057      | .540 ± .254     | .829 ± .050     | .829 ± .050     | 0.683             |
| HalfCheetah-M-10 <sup>4</sup> | .108 ± .017  | .001 ± .000      | .001 ± .000      | .072 ± .100      | .001 ± .000     | .001 ± .000     | .184 ± .258     | 0.634             |
| HalfCheetah-H-10 <sup>2</sup> | .061 ± .184  | .147 ± .064      | .207 ± .087      | .205 ± .060      | .147 ± .064     | .351 ± .231     | .417 ± .176     | 0.468             |
| HalfCheetah-H-10 <sup>3</sup> | -.192 ± .103 | .105 ± .059      | .100 ± .020      | .125 ± .028      | .105 ± .059     | .191 ± .089     | .321 ± .118     | 0.533             |
| HalfCheetah-H-10 <sup>4</sup> | .346 ± .029  | .880 ± .000      | .870 ± .008      | .870 ± .023      | .880 ± .000     | .916 ± .025     | .948 ± .035     | 0.467             |
| Average                       | .004 ± .275  | .471 ± .333      | .473 ± .297      | .496 ± .279      | .471 ± .333     | .589 ± .326     | .656 ± .287     | .618 ± .096       |

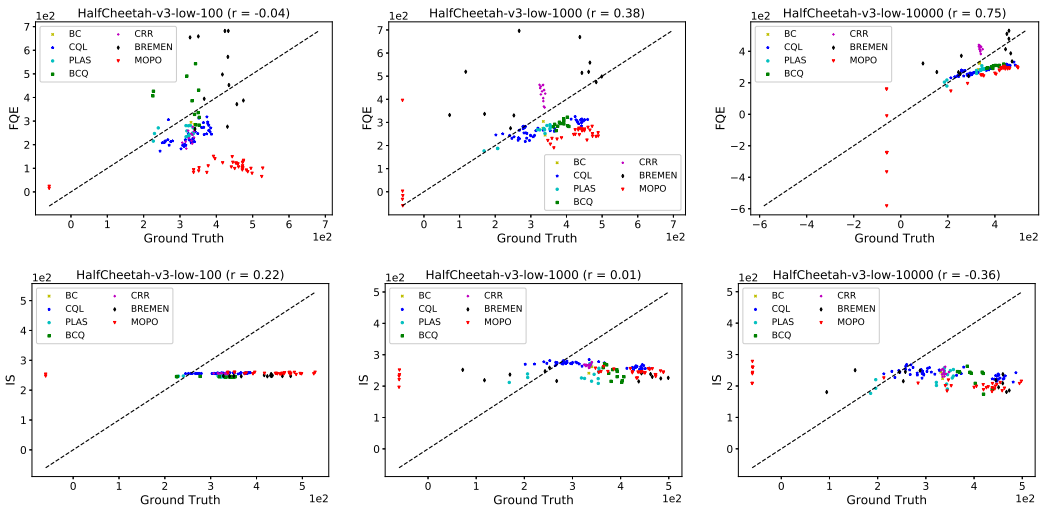

Figure 7: Estimate vs ground-truth return of OPE results for HalfCheetah-Low tasks.  $r$  stands for the correlation coefficient.

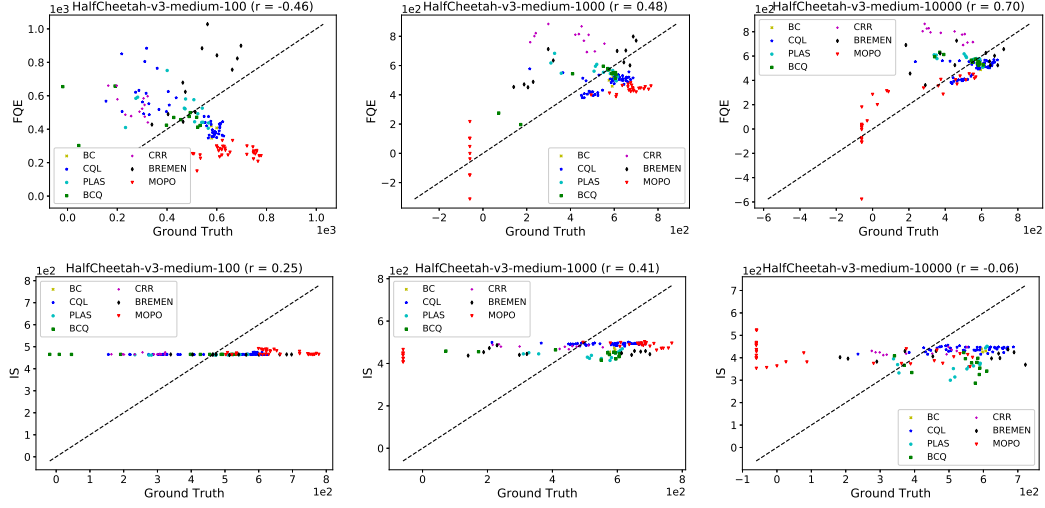

Figure 8: Estimate vs ground-truth return of OPE results for HalfCheetah-Medium tasks.  $r$  stands for the correlation coefficient.

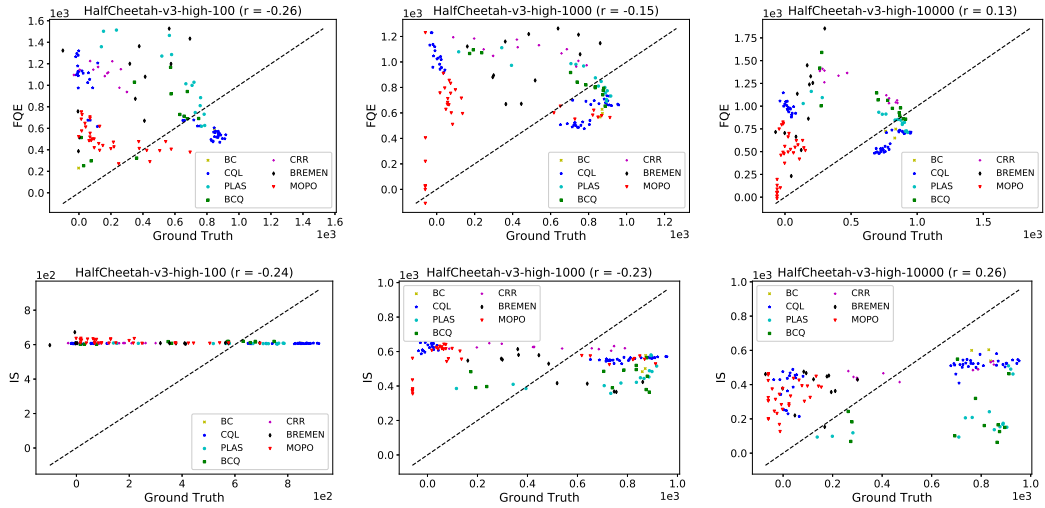

Figure 9: Estimate vs ground-truth return of OPE results for HalfCheetah-High tasks.  $r$  stands for the correlation coefficient.

Table 11: FQE performance on the policies from Hopper tasks. L, M, H stands for low, medium and high quality of dataset.

| Task                     | RC Score     | Top-1 Mean Score | Top-3 Mean Score | Top-5 Mean Score | Top-1 Max Score | Top-3 Max Score | Top-5 Max Score | Policy Mean Score |
|--------------------------|--------------|------------------|------------------|------------------|-----------------|-----------------|-----------------|-------------------|
| Hopper-L-10 <sup>2</sup> | -.101 ± .059 | .586 ± .359      | .416 ± .141      | .377 ± .029      | .586 ± .359     | .830 ± .015     | .844 ± .005     | 0.619             |
| Hopper-L-10 <sup>3</sup> | .085 ± .071  | .022 ± .029      | .057 ± .029      | .053 ± .011      | .022 ± .029     | .104 ± .038     | .112 ± .031     | 0.386             |
| Hopper-L-10 <sup>4</sup> | .223 ± .152  | .260 ± .331      | .267 ± .211      | .189 ± .130      | .260 ± .331     | .551 ± .361     | .551 ± .361     | 0.491             |
| Hopper-M-10 <sup>2</sup> | -.086 ± .065 | .104 ± .107      | .215 ± .054      | .131 ± .032      | .104 ± .107     | .404 ± .093     | .404 ± .093     | 0.383             |
| Hopper-M-10 <sup>3</sup> | -.005 ± .177 | .001 ± .001      | .002 ± .000      | .002 ± .000      | .001 ± .001     | .002 ± .001     | .002 ± .000     | 0.359             |
| Hopper-M-10 <sup>4</sup> | -.112 ± .113 | .001 ± .000      | .002 ± .000      | .002 ± .000      | .001 ± .000     | .002 ± .000     | .002 ± .000     | 0.344             |
| Hopper-H-10 <sup>2</sup> | -.246 ± .060 | .054 ± .074      | .020 ± .024      | .012 ± .015      | .054 ± .074     | .055 ± .073     | .055 ± .073     | 0.402             |
| Hopper-H-10 <sup>3</sup> | -.437 ± .028 | .002 ± .000      | .001 ± .000      | .003 ± .002      | .002 ± .000     | .002 ± .000     | .005 ± .005     | 0.387             |
| Hopper-H-10 <sup>4</sup> | -.201 ± .063 | .001 ± .001      | .008 ± .009      | .005 ± .006      | .001 ± .001     | .021 ± .027     | .021 ± .027     | 0.409             |
| Average                  | -.098 ± .206 | .115 ± .250      | .110 ± .168      | .086 ± .129      | .115 ± .250     | .219 ± .314     | .222 ± .316     | .420 ± .080       |

Table 12: IS performance on the policies from Hopper tasks. L, M, H stands for low, medium and high quality of dataset.

| Task                     | RC Score     | Top-1 Mean Score | Top-3 Mean Score | Top-5 Mean Score | Top-1 Max Score | Top-3 Max Score | Top-5 Max Score | Policy Mean Score |
|--------------------------|--------------|------------------|------------------|------------------|-----------------|-----------------|-----------------|-------------------|
| Hopper-L-10 <sup>2</sup> | .098 ± .091  | .378 ± .304      | .375 ± .208      | .323 ± .142      | .378 ± .304     | .545 ± .157     | .626 ± .179     | 0.619             |
| Hopper-L-10 <sup>3</sup> | .161 ± .037  | .287 ± .236      | .406 ± .024      | .338 ± .037      | .287 ± .236     | .587 ± .023     | .609 ± .027     | 0.386             |
| Hopper-L-10 <sup>4</sup> | .138 ± .113  | .653 ± .000      | .558 ± .106      | .417 ± .120      | .653 ± .000     | .700 ± .066     | .700 ± .066     | 0.491             |
| Hopper-M-10 <sup>2</sup> | -.430 ± .158 | .338 ± .187      | .273 ± .084      | .263 ± .107      | .338 ± .187     | .436 ± .122     | .468 ± .138     | 0.383             |
| Hopper-M-10 <sup>3</sup> | -.620 ± .045 | .002 ± .000      | .001 ± .000      | .001 ± .000      | .002 ± .000     | .002 ± .000     | .002 ± .000     | 0.359             |
| Hopper-M-10 <sup>4</sup> | -.442 ± .030 | .000 ± .001      | .001 ± .000      | .005 ± .003      | .000 ± .001     | .002 ± .000     | .023 ± .016     | 0.344             |
| Hopper-H-10 <sup>2</sup> | -.439 ± .134 | .037 ± .050      | .036 ± .024      | .072 ± .017      | .037 ± .050     | .090 ± .065     | .219 ± .054     | 0.402             |
| Hopper-H-10 <sup>3</sup> | -.209 ± .051 | .002 ± .000      | .007 ± .006      | .008 ± .005      | .002 ± .000     | .010 ± .008     | .029 ± .023     | 0.387             |
| Hopper-H-10 <sup>4</sup> | -.016 ± .052 | .013 ± .000      | .013 ± .000      | .030 ± .031      | .013 ± .000     | .013 ± .000     | .074 ± .086     | 0.409             |
| Average                  | -.195 ± .296 | .190 ± .264      | .185 ± .222      | .162 ± .177      | .190 ± .264     | .265 ± .288     | .305 ± .289     | .420 ± .080       |

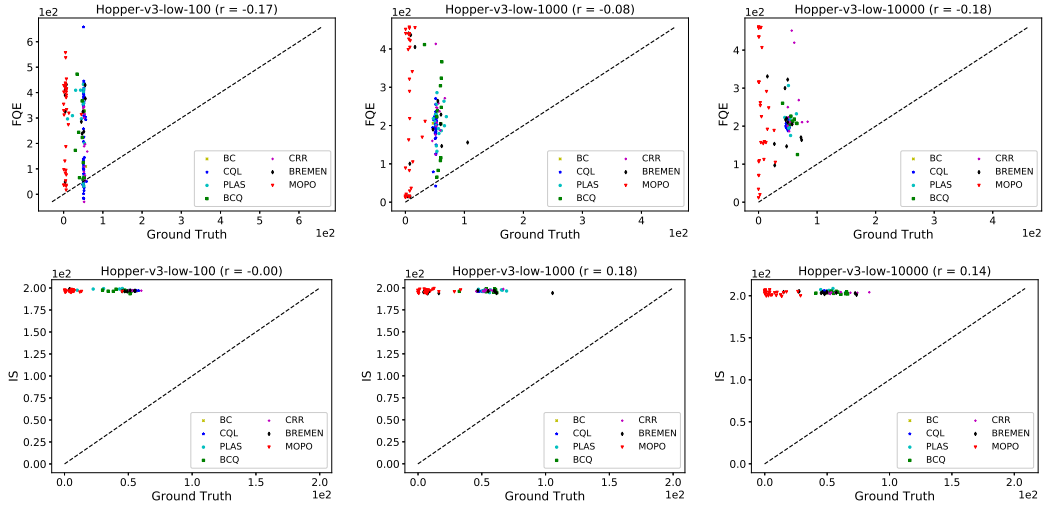

Figure 10: Estimate vs ground-truth return of OPE results for Hopper-Low tasks.  $r$  stands for the correlation coefficient.

Table 13: FQE performance on the policies from Walker2d tasks. L, M, H stands for low, medium and high quality of dataset.

| Task                       | RC Score     | Top-1 Mean Score | Top-3 Mean Score | Top-5 Mean Score | Top-1 Max Score | Top-3 Max Score | Top-5 Max Score | Policy Mean Score |
|----------------------------|--------------|------------------|------------------|------------------|-----------------|-----------------|-----------------|-------------------|
| Walker2d-L-10 <sup>2</sup> | -.287 ± .020 | .072 ± .057      | .127 ± .013      | .126 ± .013      | .072 ± .057     | .182 ± .023     | .212 ± .045     | 0.345             |
| Walker2d-L-10 <sup>3</sup> | .025 ± .045  | .161 ± .113      | .102 ± .035      | .156 ± .102      | .161 ± .113     | .218 ± .087     | .454 ± .356     | 0.418             |
| Walker2d-L-10 <sup>4</sup> | .267 ± .136  | .035 ± .018      | .036 ± .008      | .040 ± .007      | .035 ± .018     | .063 ± .014     | .073 ± .011     | 0.487             |
| Walker2d-M-10 <sup>2</sup> | -.220 ± .037 | .262 ± .183      | .239 ± .115      | .245 ± .088      | .262 ± .183     | .461 ± .124     | .535 ± .063     | 0.497             |
| Walker2d-M-10 <sup>3</sup> | -.036 ± .044 | .044 ± .027      | .133 ± .140      | .215 ± .146      | .044 ± .027     | .292 ± .325     | .562 ± .213     | 0.497             |
| Walker2d-M-10 <sup>4</sup> | -.101 ± .130 | .107 ± .073      | .155 ± .043      | .143 ± .030      | .107 ± .073     | .249 ± .043     | .249 ± .043     | 0.496             |
| Walker2d-H-10 <sup>2</sup> | -.306 ± .124 | .051 ± .000      | .093 ± .054      | .129 ± .039      | .051 ± .000     | .188 ± .097     | .275 ± .035     | 0.435             |
| Walker2d-H-10 <sup>3</sup> | -.171 ± .052 | .031 ± .034      | .052 ± .049      | .106 ± .035      | .031 ± .034     | .145 ± .147     | .322 ± .037     | 0.534             |
| Walker2d-H-10 <sup>4</sup> | .150 ± .093  | .077 ± .047      | .087 ± .017      | .069 ± .002      | .077 ± .047     | .137 ± .004     | .137 ± .004     | 0.516             |
| Average                    | -.075 ± .205 | .093 ± .108      | .114 ± .089      | .136 ± .092      | .093 ± .108     | .215 ± .172     | .313 ± .215     | .469 ± .056       |

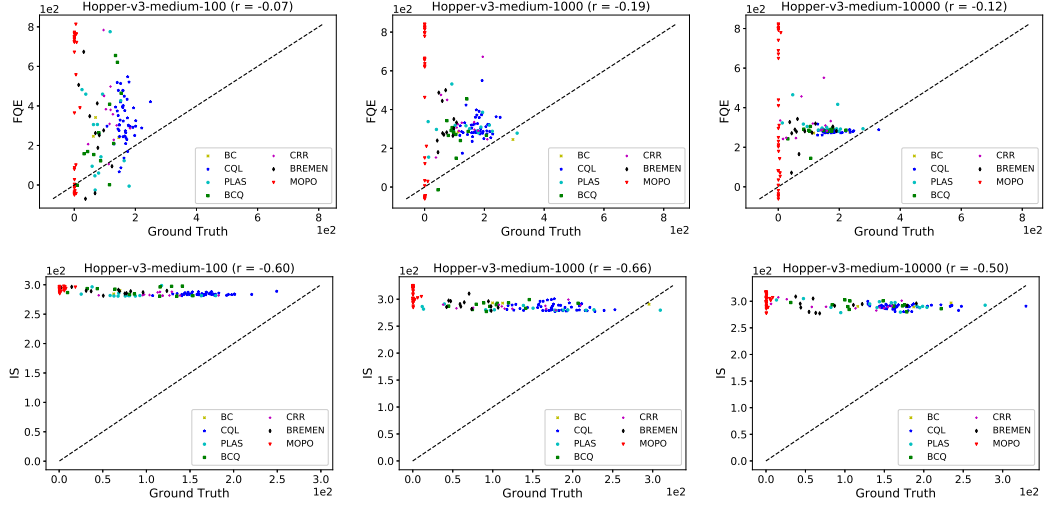

Figure 11: Estimate vs ground-truth return of OPE results for Hopper-Medium tasks.  $r$  stands for the correlation coefficient.

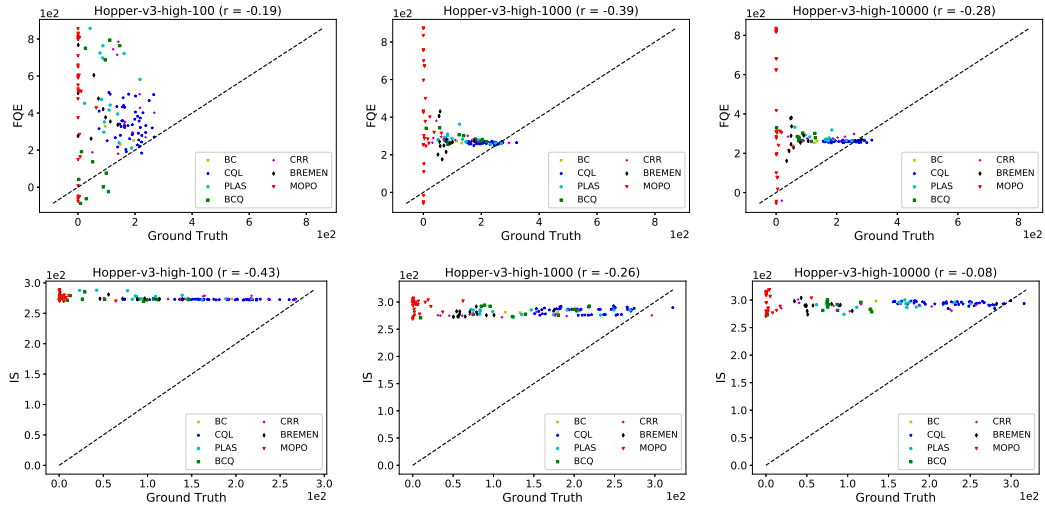

Figure 12: Estimate vs ground-truth return of OPE results for Hopper-High tasks.  $r$  stands for the correlation coefficient.

Table 14: IS performance on the policies from Walker2d tasks. L, M, H stands for low, medium and high quality of dataset.

| Task               | RC Score     | Top-1 Mean Score | Top-3 Mean Score | Top-5 Mean Score | Top-1 Max Score | Top-3 Max Score | Top-5 Max Score | Policy Mean Score |
|--------------------|--------------|------------------|------------------|------------------|-----------------|-----------------|-----------------|-------------------|
| Walker2d-L- $10^2$ | .064 ± .094  | .167 ± .051      | .164 ± .013      | .165 ± .006      | .167 ± .051     | .220 ± .021     | .246 ± .016     | 0.345             |
| Walker2d-L- $10^3$ | -.515 ± .051 | .094 ± .030      | .060 ± .019      | .041 ± .009      | .094 ± .030     | .115 ± .000     | .115 ± .000     | 0.418             |
| Walker2d-L- $10^4$ | -.326 ± .027 | .011 ± .002      | .018 ± .007      | .016 ± .004      | .011 ± .002     | .030 ± .023     | .030 ± .023     | 0.487             |
| Walker2d-M- $10^2$ | .161 ± .166  | .020 ± .018      | .256 ± .111      | .361 ± .092      | .020 ± .018     | .571 ± .186     | .734 ± .078     | 0.497             |
| Walker2d-M- $10^3$ | -.021 ± .038 | .009 ± .001      | .009 ± .000      | .072 ± .048      | .009 ± .001     | .010 ± .000     | .306 ± .245     | 0.497             |
| Walker2d-M- $10^4$ | -.036 ± .036 | .298 ± .229      | .450 ± .250      | .334 ± .134      | .298 ± .229     | .752 ± .161     | .790 ± .147     | 0.496             |
| Walker2d-H- $10^2$ | .441 ± .055  | .364 ± .297      | .519 ± .088      | .528 ± .099      | .364 ± .297     | .858 ± .058     | .878 ± .033     | 0.435             |
| Walker2d-H- $10^3$ | -.044 ± .065 | .093 ± .124      | .160 ± .078      | .221 ± .072      | .093 ± .124     | .436 ± .188     | .649 ± .235     | 0.534             |
| Walker2d-H- $10^4$ | .215 ± .070  | .117 ± .092      | .108 ± .041      | .101 ± .006      | .117 ± .092     | .191 ± .070     | .241 ± .000     | 0.516             |
| Average            | -.007 ± .279 | .130 ± .182      | .194 ± .199      | .204 ± .177      | .130 ± .182     | .354 ± .316     | .443 ± .326     | .469 ± .056       |

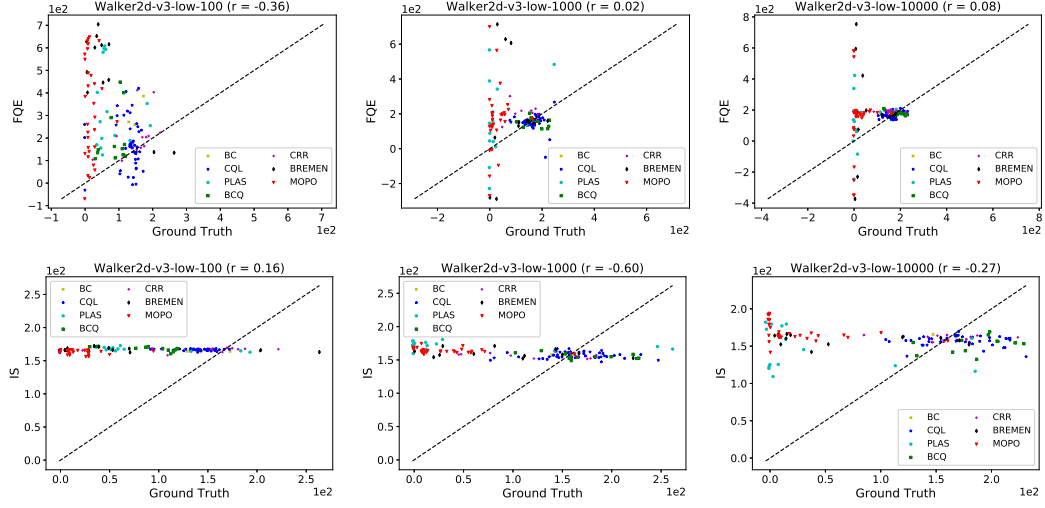

Figure 13: Estimate vs ground-truth return of OPE results for Walker2d-Low tasks.  $r$  stands for the correlation coefficient.

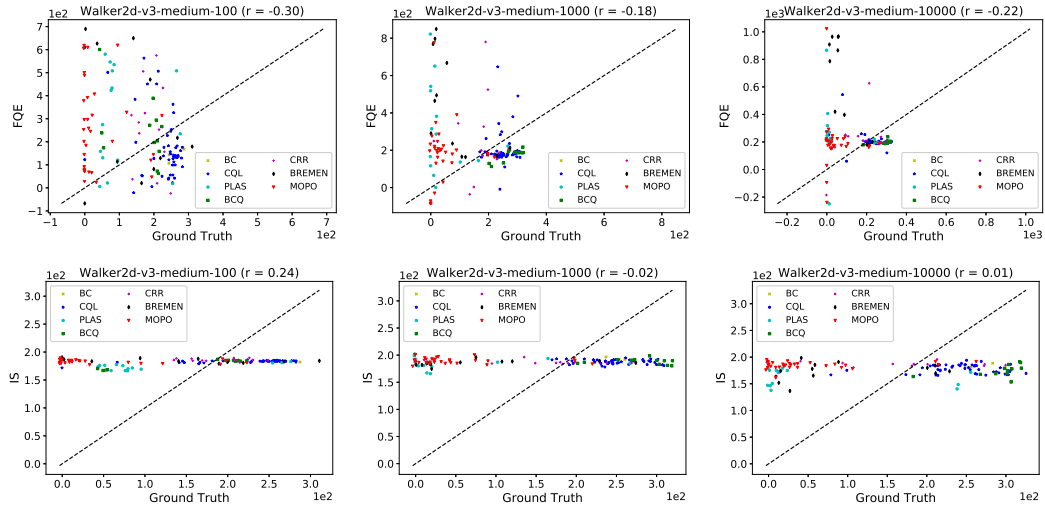

Figure 14: Estimate vs ground-truth return of OPE results for Walker2d-Medium tasks.  $r$  stands for the correlation coefficient.

Table 15: FQE performance on the policies from IB tasks. L, M, H stands for low, medium and high quality of dataset.

| Task         | RC Score         | Top-1 Mean Score | Top-3 Mean Score | Top-5 Mean Score | Top-1 Max Score | Top-3 Max Score | Top-5 Max Score | Policy Mean Score |
|--------------|------------------|------------------|------------------|------------------|-----------------|-----------------|-----------------|-------------------|
| IB-L- $10^2$ | .282 $\pm$ .027  | .060 $\pm$ .000  | .645 $\pm$ .000  | .511 $\pm$ .088  | .060 $\pm$ .000 | .940 $\pm$ .000 | .940 $\pm$ .000 | 0.847             |
| IB-L- $10^3$ | -.013 $\pm$ .121 | .967 $\pm$ .012  | .322 $\pm$ .004  | .320 $\pm$ .088  | .967 $\pm$ .012 | .967 $\pm$ .012 | .967 $\pm$ .012 | 0.862             |
| IB-L- $10^4$ | -.136 $\pm$ .091 | .935 $\pm$ .014  | .895 $\pm$ .020  | .802 $\pm$ .176  | .935 $\pm$ .014 | .968 $\pm$ .020 | .982 $\pm$ .020 | 0.850             |
| IB-M- $10^2$ | .170 $\pm$ .047  | .781 $\pm$ .000  | .834 $\pm$ .067  | .828 $\pm$ .038  | .781 $\pm$ .000 | .922 $\pm$ .057 | .966 $\pm$ .012 | 0.873             |
| IB-M- $10^3$ | .182 $\pm$ .009  | .863 $\pm$ .067  | .902 $\pm$ .002  | .919 $\pm$ .001  | .863 $\pm$ .067 | .948 $\pm$ .007 | .953 $\pm$ .007 | 0.842             |
| IB-M- $10^4$ | .243 $\pm$ .015  | .000 $\pm$ .000  | .632 $\pm$ .005  | .756 $\pm$ .003  | .000 $\pm$ .000 | .953 $\pm$ .015 | .953 $\pm$ .015 | 0.881             |
| IB-H- $10^2$ | .098 $\pm$ .015  | .452 $\pm$ .303  | .708 $\pm$ .106  | .640 $\pm$ .037  | .452 $\pm$ .303 | .914 $\pm$ .000 | .926 $\pm$ .017 | 0.715             |
| IB-H- $10^3$ | .102 $\pm$ .034  | .879 $\pm$ .058  | .871 $\pm$ .031  | .855 $\pm$ .052  | .879 $\pm$ .058 | .911 $\pm$ .041 | .911 $\pm$ .042 | 0.732             |
| IB-H- $10^4$ | .007 $\pm$ .025  | .889 $\pm$ .119  | .928 $\pm$ .034  | .858 $\pm$ .034  | .889 $\pm$ .119 | .982 $\pm$ .009 | .982 $\pm$ .009 | 0.694             |
| Average      | .104 $\pm$ .138  | .647 $\pm$ .377  | .749 $\pm$ .190  | .721 $\pm$ .200  | .647 $\pm$ .377 | .945 $\pm$ .035 | .953 $\pm$ .029 | .811 $\pm$ .070   |

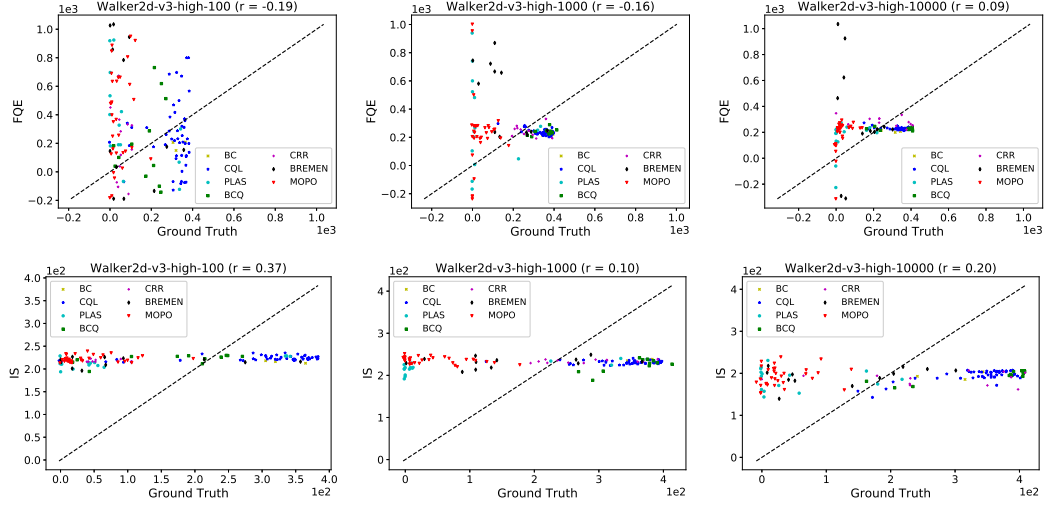

Figure 15: Estimate vs ground-truth return of OPE results for Walker2d-High tasks.  $r$  stands for the correlation coefficient.

Table 16: IS performance on the policies from IB tasks. L, M, H stands for low, medium and high quality of dataset.

| Task         | RC Score         | Top-1 Mean Score | Top-3 Mean Score | Top-5 Mean Score | Top-1 Max Score | Top-3 Max Score | Top-5 Max Score | Policy Mean Score |
|--------------|------------------|------------------|------------------|------------------|-----------------|-----------------|-----------------|-------------------|
| IB-L- $10^2$ | $-.375 \pm .129$ | $.867 \pm .091$  | $.837 \pm .045$  | $.843 \pm .048$  | $.867 \pm .091$ | $.932 \pm .002$ | $.934 \pm .005$ | 0.847             |
| IB-L- $10^3$ | $-.519 \pm .120$ | $.317 \pm .447$  | $.317 \pm .447$  | $.308 \pm .436$  | $.317 \pm .447$ | $.317 \pm .447$ | $.317 \pm .447$ | 0.862             |
| IB-L- $10^4$ | $-.375 \pm .016$ | $.980 \pm .018$  | $.861 \pm .150$  | $.771 \pm .270$  | $.980 \pm .018$ | $.993 \pm .000$ | $.993 \pm .000$ | 0.850             |
| IB-M- $10^2$ | $.195 \pm .294$  | $.962 \pm .025$  | $.963 \pm .015$  | $.908 \pm .103$  | $.962 \pm .025$ | $.980 \pm .026$ | $.995 \pm .005$ | 0.873             |
| IB-M- $10^3$ | $-.250 \pm .045$ | $.877 \pm .094$  | $.888 \pm .041$  | $.885 \pm .043$  | $.877 \pm .094$ | $.944 \pm .001$ | $.944 \pm .000$ | 0.842             |
| IB-M- $10^4$ | $-.341 \pm .036$ | $.251 \pm .355$  | $.571 \pm .005$  | $.722 \pm .002$  | $.251 \pm .355$ | $.960 \pm .014$ | $.972 \pm .008$ | 0.881             |
| IB-H- $10^2$ | $.053 \pm .099$  | $.820 \pm .004$  | $.789 \pm .122$  | $.861 \pm .067$  | $.820 \pm .004$ | $.993 \pm .000$ | $.993 \pm .000$ | 0.715             |
| IB-H- $10^3$ | $-.170 \pm .018$ | $.822 \pm .002$  | $.810 \pm .014$  | $.814 \pm .008$  | $.822 \pm .002$ | $.822 \pm .002$ | $.822 \pm .002$ | 0.732             |
| IB-H- $10^4$ | $.097 \pm .006$  | $.819 \pm .000$  | $.819 \pm .000$  | $.819 \pm .000$  | $.819 \pm .000$ | $.819 \pm .000$ | $.819 \pm .000$ | 0.694             |
| Average      | $-.187 \pm .263$ | $.746 \pm .320$  | $.762 \pm .248$  | $.770 \pm .247$  | $.746 \pm .320$ | $.862 \pm .252$ | $.866 \pm .253$ | $.811 \pm .070$   |

Table 17: FQE performance on the policies from FinRL tasks. L, M, H stands for low, medium and high quality of dataset.

| Task            | RC Score         | Top-1 Mean Score | Top-3 Mean Score | Top-5 Mean Score | Top-1 Max Score | Top-3 Max Score | Top-5 Max Score  | Policy Mean Score |
|-----------------|------------------|------------------|------------------|------------------|-----------------|-----------------|------------------|-------------------|
| FinRL-L- $10^2$ | $-.012 \pm .080$ | $.701 \pm .421$  | $.800 \pm .140$  | $.510 \pm .093$  | $.701 \pm .421$ | $.999 \pm .001$ | $.999 \pm .001$  | 0.285             |
| FinRL-L- $10^3$ | $-.015 \pm .030$ | $.209 \pm .010$  | $.266 \pm .040$  | $.353 \pm .063$  | $.209 \pm .010$ | $.349 \pm .071$ | $.685 \pm .232$  | 0.313             |
| FinRL-M- $10^2$ | $-.042 \pm .058$ | $.112 \pm .000$  | $.257 \pm .084$  | $.416 \pm .044$  | $.112 \pm .000$ | $.442 \pm .178$ | $1.000 \pm .000$ | 0.248             |
| FinRL-M- $10^3$ | $-.005 \pm .068$ | $.400 \pm .246$  | $.385 \pm .043$  | $.377 \pm .121$  | $.400 \pm .246$ | $.821 \pm .126$ | $.911 \pm .126$  | 0.195             |
| FinRL-H- $10^2$ | $-.056 \pm .121$ | $.165 \pm .042$  | $.108 \pm .012$  | $.192 \pm .029$  | $.165 \pm .042$ | $.196 \pm .037$ | $.484 \pm .068$  | 0.291             |
| FinRL-H- $10^3$ | $-.042 \pm .149$ | $.385 \pm .160$  | $.337 \pm .168$  | $.387 \pm .126$  | $.385 \pm .160$ | $.440 \pm .210$ | $.721 \pm .208$  | 0.384             |
| Average         | $-.029 \pm .095$ | $.329 \pm .289$  | $.359 \pm .237$  | $.372 \pm .129$  | $.329 \pm .289$ | $.541 \pm .306$ | $.800 \pm .234$  | $.286 \pm .058$   |

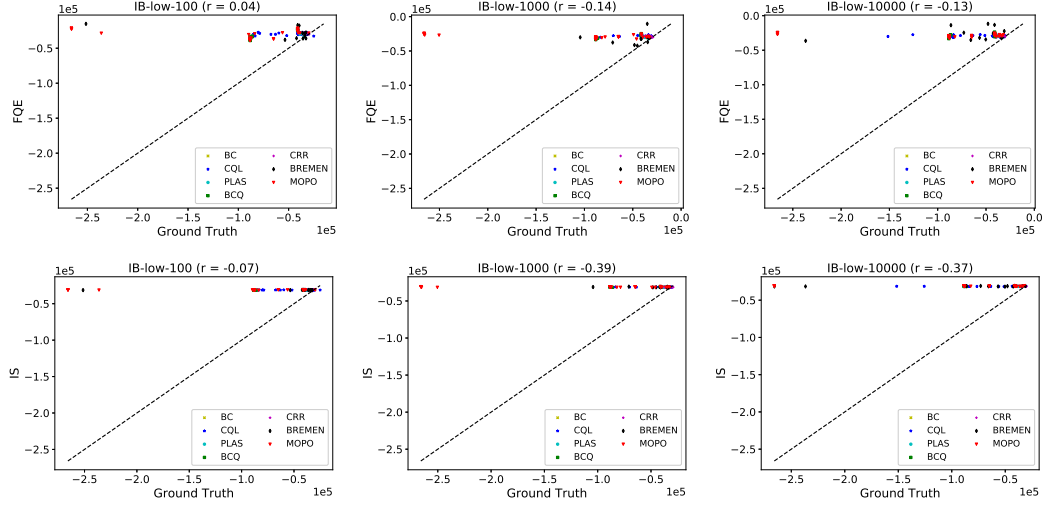

Figure 16: Estimate vs ground-truth return of OPE results for IB-Low tasks.  $r$  stands for the correlation coefficient.

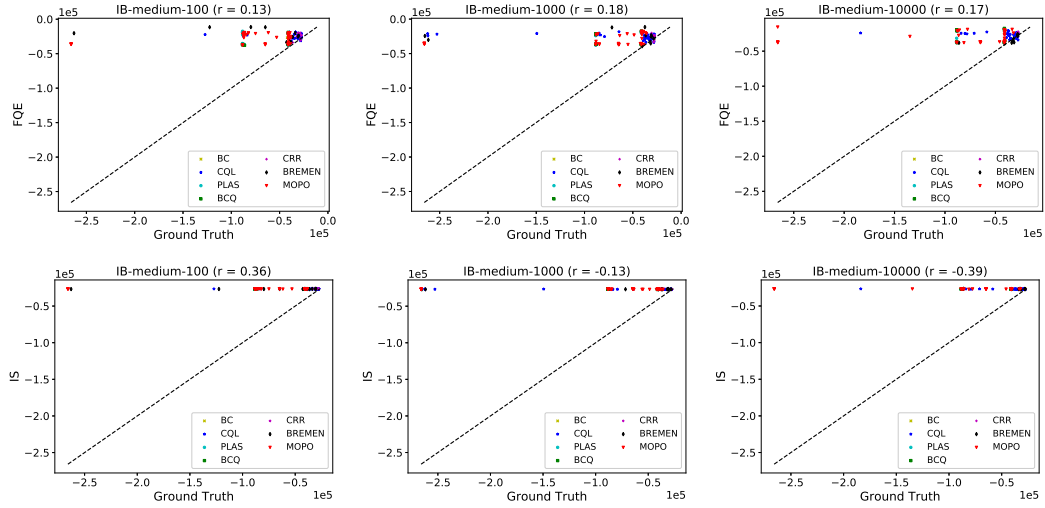

Figure 17: Estimate vs ground-truth return of OPE results for IB-Medium tasks.  $r$  stands for the correlation coefficient.

Table 18: IS performance on the policies from FinRL tasks. L, M, H stands for low, medium and high quality of dataset.

| Task            | RC Score         | Top-1 Mean Score | Top-3 Mean Score | Top-5 Mean Score | Top-1 Max Score | Top-3 Max Score | Top-5 Max Score | Policy Mean Score |
|-----------------|------------------|------------------|------------------|------------------|-----------------|-----------------|-----------------|-------------------|
| FinRL-L- $10^2$ | .066 $\pm$ .109  | .267 $\pm$ .147  | .264 $\pm$ .022  | .247 $\pm$ .027  | .267 $\pm$ .147 | .489 $\pm$ .035 | .489 $\pm$ .035 | 0.285             |
| FinRL-L- $10^3$ | -.041 $\pm$ .032 | .333 $\pm$ .047  | .361 $\pm$ .035  | .301 $\pm$ .018  | .333 $\pm$ .047 | .406 $\pm$ .029 | .406 $\pm$ .029 | 0.313             |
| FinRL-M- $10^2$ | .103 $\pm$ .112  | .162 $\pm$ .051  | .263 $\pm$ .089  | .279 $\pm$ .090  | .162 $\pm$ .051 | .426 $\pm$ .210 | .428 $\pm$ .212 | 0.248             |
| FinRL-M- $10^3$ | .056 $\pm$ .077  | .537 $\pm$ .328  | .297 $\pm$ .097  | .289 $\pm$ .080  | .537 $\pm$ .328 | .548 $\pm$ .319 | .687 $\pm$ .276 | 0.195             |
| FinRL-H- $10^2$ | -.046 $\pm$ .065 | .283 $\pm$ .042  | .286 $\pm$ .067  | .304 $\pm$ .077  | .283 $\pm$ .042 | .348 $\pm$ .108 | .411 $\pm$ .144 | 0.291             |
| FinRL-H- $10^3$ | .111 $\pm$ .027  | .458 $\pm$ .080  | .398 $\pm$ .007  | .404 $\pm$ .011  | .458 $\pm$ .080 | .458 $\pm$ .080 | .477 $\pm$ .074 | 0.384             |
| Average         | .042 $\pm$ .100  | .340 $\pm$ .198  | .312 $\pm$ .081  | .304 $\pm$ .077  | .340 $\pm$ .198 | .446 $\pm$ .178 | .483 $\pm$ .185 | .286 $\pm$ .058   |



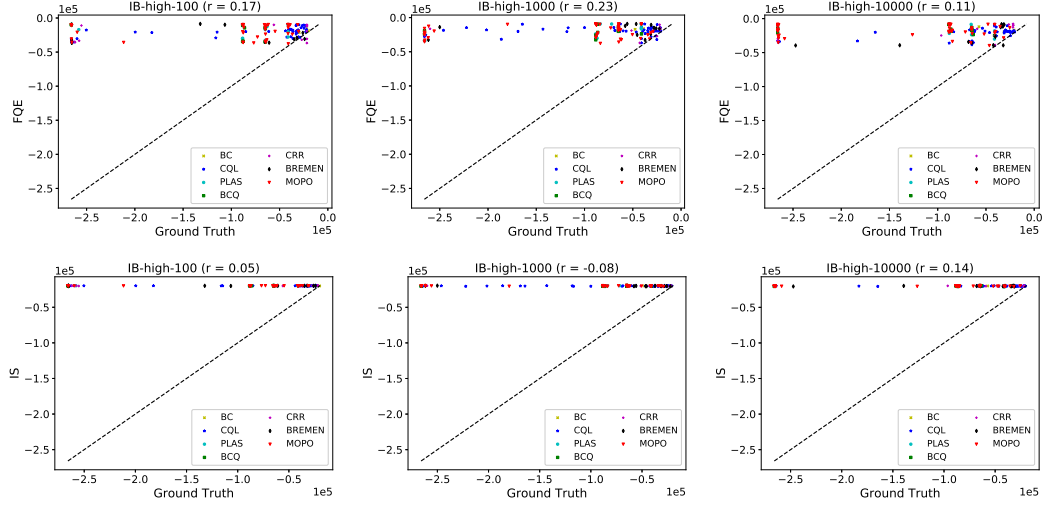

Figure 18: Estimate vs ground-truth return of OPE results for IB-High tasks.  $r$  stands for the correlation coefficient.

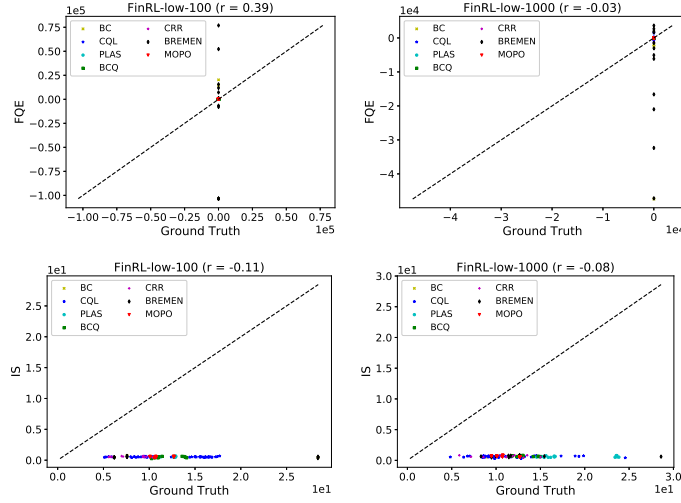

Figure 19: Estimate vs ground-truth return of OPE results for FinRL-Low tasks.  $r$  stands for the correlation coefficient.

Table 19: FQE performance on the policies from CL tasks. L, M, H stands for low, medium and high quality of dataset.

| Task         | RC Score     | Top-1 Mean Score | Top-3 Mean Score | Top-5 Mean Score | Top-1 Max Score | Top-3 Max Score | Top-5 Max Score | Policy Mean Score |
|--------------|--------------|------------------|------------------|------------------|-----------------|-----------------|-----------------|-------------------|
| CL-L- $10^2$ | .144 ± .056  | .270 ± .012      | .296 ± .028      | .294 ± .024      | .270 ± .012     | .358 ± .065     | .411 ± .047     | 0.443             |
| CL-L- $10^3$ | .479 ± .013  | .511 ± .303      | .533 ± .163      | .476 ± .091      | .511 ± .303     | .807 ± .014     | .807 ± .014     | 0.504             |
| CL-L- $10^4$ | .641 ± .048  | .710 ± .005      | .738 ± .019      | .750 ± .009      | .710 ± .005     | .798 ± .056     | .847 ± .027     | 0.494             |
| CL-M- $10^2$ | .288 ± .250  | .231 ± .100      | .242 ± .058      | .183 ± .088      | .231 ± .100     | .396 ± .098     | .396 ± .098     | 0.414             |
| CL-M- $10^3$ | .429 ± .038  | .780 ± .155      | .812 ± .004      | .725 ± .018      | .780 ± .155     | 1.000 ± .000    | 1.000 ± .000    | 0.405             |
| CL-M- $10^4$ | .638 ± .031  | .220 ± .138      | .297 ± .002      | .440 ± .068      | .220 ± .138     | .414 ± .000     | .798 ± .076     | 0.486             |
| CL-L- $10^2$ | -.116 ± .145 | .626 ± .422      | .508 ± .347      | .486 ± .345      | .626 ± .422     | .627 ± .420     | .645 ± .428     | 0.423             |
| CL-H- $10^3$ | .584 ± .029  | .621 ± .082      | .697 ± .065      | .771 ± .044      | .621 ± .082     | .843 ± .088     | .907 ± .027     | 0.487             |
| CL-H- $10^4$ | .618 ± .044  | .115 ± .006      | .221 ± .116      | .405 ± .065      | .115 ± .006     | .450 ± .352     | .979 ± .030     | 0.483             |
| Average      | .412 ± .267  | .454 ± .301      | .483 ± .256      | .503 ± .233      | .454 ± .301     | .633 ± .293     | .754 ± .260     | .460 ± .036       |

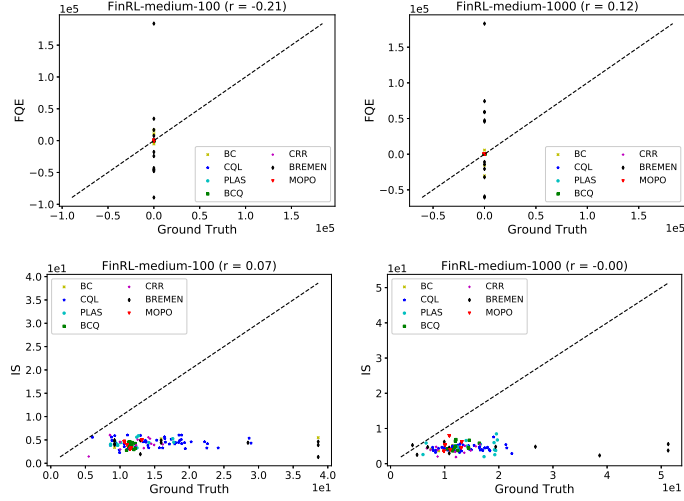

Figure 20: Estimate vs ground-truth return of OPE results for FinRL-Medium tasks.  $r$  stands for the correlation coefficient.

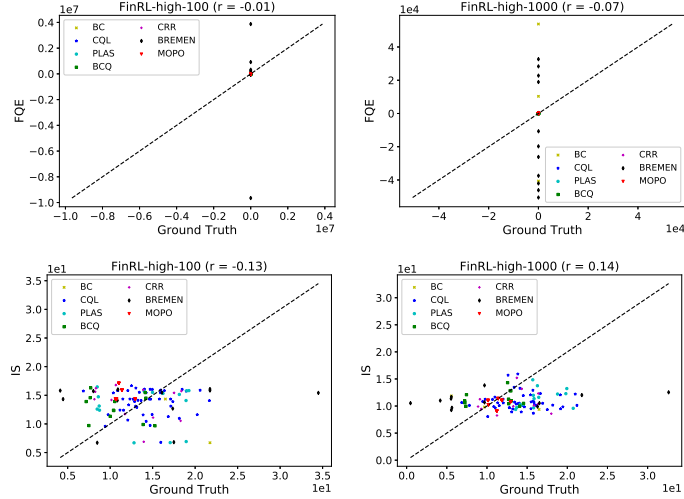

Figure 21: Estimate vs ground-truth return of OPE results for FinRL-High tasks.  $r$  stands for the correlation coefficient.

Table 20: IS performance on the policies from CL tasks. L, M, H stands for low, medium and high quality of dataset.

| Task         | RC Score         | Top-1 Mean Score | Top-3 Mean Score | Top-5 Mean Score | Top-1 Max Score | Top-3 Max Score | Top-5 Max Score | Policy Mean Score |
|--------------|------------------|------------------|------------------|------------------|-----------------|-----------------|-----------------|-------------------|
| CL-L- $10^2$ | $-.341 \pm .128$ | $.079 \pm .015$  | $.068 \pm .011$  | $.072 \pm .007$  | $.079 \pm .015$ | $.083 \pm .009$ | $.092 \pm .006$ | 0.443             |
| CL-L- $10^3$ | $.292 \pm .081$  | $.563 \pm .113$  | $.575 \pm .158$  | $.653 \pm .097$  | $.563 \pm .113$ | $.705 \pm .110$ | $.815 \pm .013$ | 0.504             |
| CL-L- $10^4$ | $.301 \pm .108$  | $.757 \pm .077$  | $.775 \pm .010$  | $.767 \pm .011$  | $.757 \pm .077$ | $.866 \pm .000$ | $.866 \pm .000$ | 0.494             |
| CL-M- $10^2$ | $-.284 \pm .225$ | $.269 \pm .172$  | $.199 \pm .066$  | $.275 \pm .073$  | $.269 \pm .172$ | $.344 \pm .075$ | $.503 \pm .227$ | 0.414             |
| CL-M- $10^3$ | $.079 \pm .091$  | $.014 \pm .004$  | $.014 \pm .002$  | $.014 \pm .001$  | $.014 \pm .004$ | $.017 \pm .000$ | $.017 \pm .000$ | 0.405             |
| CL-M- $10^4$ | $.108 \pm .316$  | $.260 \pm .341$  | $.289 \pm .386$  | $.380 \pm .326$  | $.260 \pm .341$ | $.337 \pm .448$ | $.592 \pm .405$ | 0.486             |
| CL-H- $10^2$ | $.217 \pm .078$  | $.414 \pm .366$  | $.331 \pm .180$  | $.301 \pm .153$  | $.414 \pm .366$ | $.595 \pm .316$ | $.679 \pm .298$ | 0.423             |
| CL-H- $10^3$ | $.615 \pm .066$  | $.883 \pm .035$  | $.914 \pm .042$  | $.912 \pm .037$  | $.883 \pm .035$ | $.969 \pm .029$ | $.969 \pm .029$ | 0.487             |
| CL-H- $10^4$ | $.678 \pm .096$  | $.943 \pm .055$  | $.872 \pm .020$  | $.863 \pm .019$  | $.943 \pm .055$ | $.958 \pm .035$ | $.958 \pm .035$ | 0.483             |
| Average      | $.185 \pm .362$  | $.465 \pm .371$  | $.448 \pm .360$  | $.471 \pm .343$  | $.465 \pm .371$ | $.542 \pm .391$ | $.610 \pm .380$ | $.460 \pm .036$   |

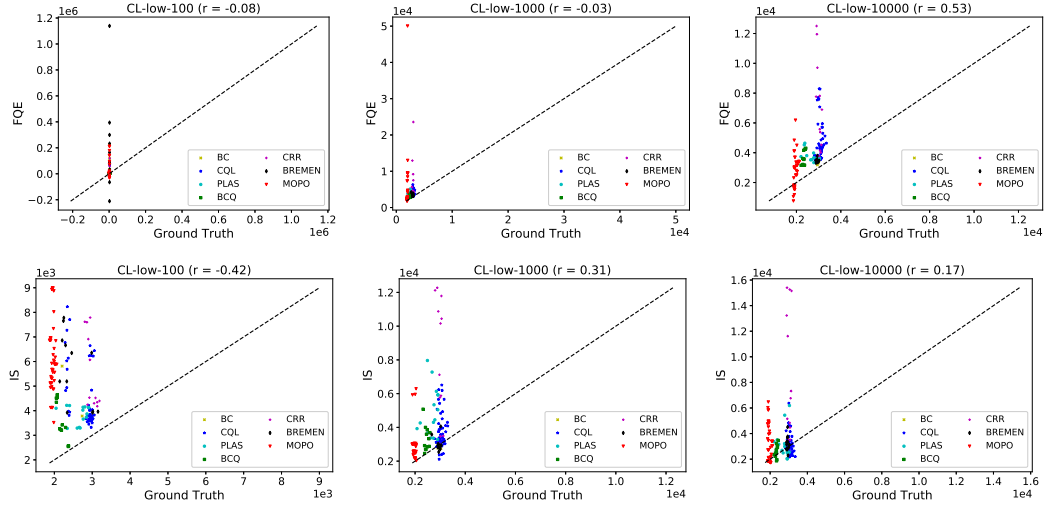

Figure 22: Estimate vs ground-truth return of OPE results for CL-Low tasks.  $r$  stands for the correlation coefficient.

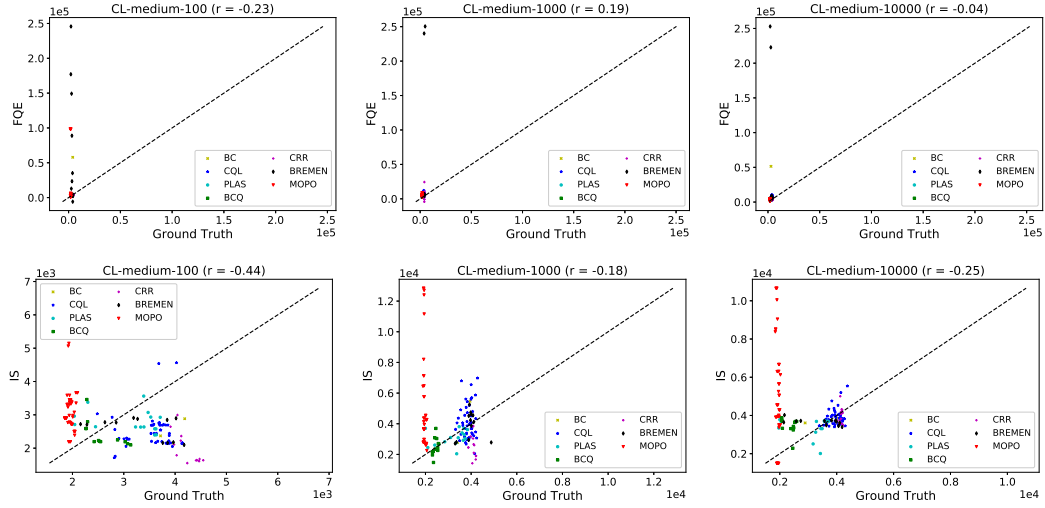

Figure 23: Estimate vs ground-truth return of OPE results for CL-Medium tasks.  $r$  stands for the correlation coefficient.

Table 21: FQE performance on the policies from SalesPromotion tasks.

| Task                     | RC Score    | Top-1 Mean Score | Top-3 Mean Score | Top-5 Mean Score | Top-1 Max Score | Top-3 Max Score | Top-5 Max Score | Policy Mean Score |
|--------------------------|-------------|------------------|------------------|------------------|-----------------|-----------------|-----------------|-------------------|
| SP-human-10 <sup>4</sup> | .131 ± .062 | .527 ± .226      | .741 ± .078      | .788 ± .049      | .527 ± .226     | .852 ± .009     | .865 ± .000     | 0.400             |
| Average                  | .131 ± .062 | .527 ± .226      | .741 ± .078      | .788 ± .049      | .527 ± .226     | .852 ± .009     | .865 ± .000     | .400 ± .000       |

Table 22: IS performance on the policies from SalesPromotion tasks.

| Task                     | RC Score     | Top-1 Mean Score | Top-3 Mean Score | Top-5 Mean Score | Top-1 Max Score | Top-3 Max Score | Top-5 Max Score | Policy Mean Score |
|--------------------------|--------------|------------------|------------------|------------------|-----------------|-----------------|-----------------|-------------------|
| SP-human-10 <sup>4</sup> | -.080 ± .052 | .195 ± .099      | .330 ± .246      | .300 ± .170      | .195 ± .099     | .404 ± .315     | .494 ± .258     | 0.400             |
| Average                  | -.080 ± .052 | .195 ± .099      | .330 ± .246      | .300 ± .170      | .195 ± .099     | .404 ± .315     | .494 ± .258     | .400 ± .000       |

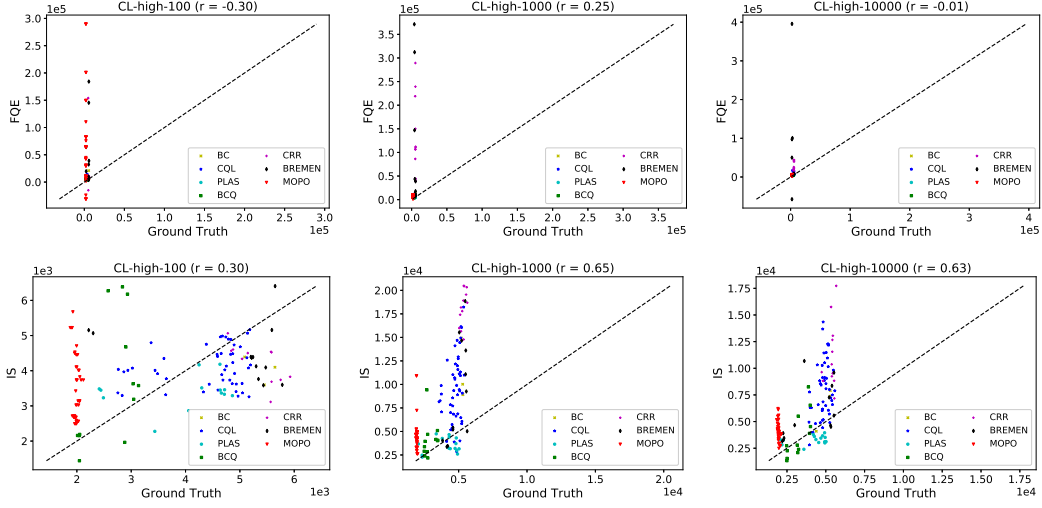

Figure 24: Estimate vs ground-truth return of OPE results for CL-High tasks.  $r$  stands for the correlation coefficient.

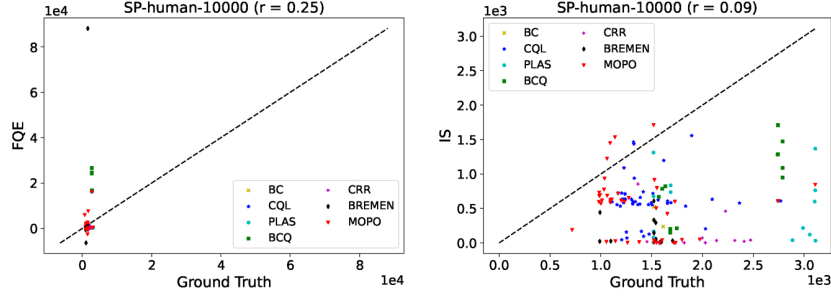

Figure 25: Estimate vs ground-truth return of OPE results for SalesPromotion tasks.  $r$  stands for the correlation coefficient.

## H Detailed Scores and Additional Tables

In this section, we provide the winning rates table, raw and normalized scores that are not fitted in the main paper.

Table 23: Winning ratio of the 3 baselines over the 52 tasks by online evaluation.

| Baseline        | BCQ   | PLAS  | CQL   | CRR   | BREMEN | MOPO  |
|-----------------|-------|-------|-------|-------|--------|-------|
| Det. Policy     | 34.6% | 44.2% | 86.5% | 65.4% | 40.4%  | 15.4% |
| Behavior Policy | 42.3% | 53.8% | 92.3% | 75.0% | 48.1%  | 17.3% |
| BC              | 42.3% | 46.2% | 88.5% | 71.2% | 38.5%  | 17.3% |

Table 24: Winning ratio of the 3 baselines over the 52 tasks by FQE evaluation.

| Baseline        | BCQ   | PLAS  | CQL   | CRR   | BREMEN | MOPO  |
|-----------------|-------|-------|-------|-------|--------|-------|
| Det. Policy     | 17.3% | 11.5% | 32.7% | 38.5% | 23.1%  | 13.5% |
| Behavior Policy | 23.1% | 11.5% | 42.3% | 40.4% | 21.2%  | 9.6%  |
| BC              | 13.5% | 17.3% | 42.3% | 40.4% | 15.4%  | 9.6%  |

Table 25: Winning ratio of the 3 baselines over the 52 tasks by IS evaluation.

| Baseline        | BCQ   | PLAS  | CQL   | CRR   | BREMEN | MOPO  |
|-----------------|-------|-------|-------|-------|--------|-------|
| Det. Policy     | 25.0% | 30.8% | 38.5% | 48.1% | 17.3%  | 15.4% |
| Behavior Policy | 28.8% | 34.6% | 55.8% | 51.9% | 15.4%  | 13.5% |
| BC              | 26.9% | 28.8% | 38.5% | 48.1% | 21.2%  | 13.5% |

Table 26: Normalized score for HalfCheetah tasks. For each task, three lines indicate the results of online evaluation, FQE evaluation, WIS evaluation respectively. Bold numbers indicate the best result for each task, while numbers marked by \* indicate results worse than BC. The task name is composed of the specific task, the quality of dataset, and the number of trajectories. L, M, and H stands for low, medium, high respectively. Det. is abbreviation of deterministic.

| Task Name                     | Expert Policy | Det. Policy | Behavior Policy | Random | BC                | BCQ               | PLAS              | CQL               | CRR         | BREMEN            | MOPO              |
|-------------------------------|---------------|-------------|-----------------|--------|-------------------|-------------------|-------------------|-------------------|-------------|-------------------|-------------------|
| HalfCheetah-L-10 <sup>2</sup> | 100           | 27          | 25              | 0      | 29.1 + 0.3        | 30.2 + 0.3        | 28.8 + 0.4*       | 32.6 + 0.3        | 29.0 + 0.2* | 37.6 + 1.8        | <b>42.0 + 1.8</b> |
|                               |               |             |                 |        | 28.9 + 0.3        | 29.6 + 0.0        | 25.5 + 3.5*       | 31.5 + 0.8        | 29.0 + 0.0  | <b>36.5 + 0.3</b> | 36.3 + 1.9        |
|                               |               |             |                 |        | 29.4 + 0.0        | 26.6 + 1.6*       | 28.0 + 0.2*       | 30.2 + 1.6        | 28.0 + 0.7* | 34.3 + 3.4        | <b>35.3 + 4.3</b> |
| HalfCheetah-L-10 <sup>3</sup> | 100           | 27          | 25              | 0      | 29.1 + 0.2        | 34.1 + 0.4        | 30.6 + 0.0        | 38.2 + 0.5        | 29.2 + 0.2  | 39.6 + 1.8        | <b>40.1 + 0.9</b> |
|                               |               |             |                 |        | 29.0 + 0.0        | 34.4 + 0.0        | 30.5 + 0.0        | <b>36.6 + 0.7</b> | 28.6 + 0.6* | 23.6 + 0.0*       | 24.9 + 19.3*      |
|                               |               |             |                 |        | 29.1 + 0.2        | 31.7 + 0.2        | 29.3 + 0.0        | 27.3 + 3.5*       | 29.0 + 0.3* | 22.2 + 0.3*       | <b>33.5 + 2.0</b> |
| HalfCheetah-L-10 <sup>4</sup> | 100           | 27          | 25              | 0      | 28.9 + 0.1        | 36.7 + 0.7        | 30.6 + 0.2        | <b>39.8 + 1.4</b> | 29.3 + 0.5  | 39.1 + 0.3        | 37.7 + 0.3        |
|                               |               |             |                 |        | 29.0 + 0.0        | 35.7 + 1.1        | 30.1 + 0.5        | <b>39.0 + 1.2</b> | 28.9 + 0.2* | 38.9 + 0.0        | 24.0 + 18.7*      |
|                               |               |             |                 |        | 28.8 + 0.1        | <b>32.1 + 0.7</b> | 29.8 + 0.7        | 26.3 + 4.3*       | 29.2 + 0.3  | 19.4 + 3.4*       | -2.4 + 0.0*       |
| HalfCheetah-M-10 <sup>2</sup> | 100           | 50          | 46              | 0      | 48.9 + 0.8        | 43.2 + 1.5*       | 46.7 + 1.0*       | 51.6 + 0.4        | 27.2 + 0.6* | 52.3 + 5.0        | <b>63.1 + 0.5</b> |
|                               |               |             |                 |        | 48.3 + 0.0        | 12.0 + 7.9*       | 34.2 + 0.0*       | 24.8 + 3.6*       | 17.2 + 1.3* | 47.1 + 0.0*       | <b>52.1 + 0.4</b> |
|                               |               |             |                 |        | 49.5 + 0.7        | 42.9 + 1.2*       | 45.8 + 2.2*       | 40.2 + 11.4*      | 24.7 + 4.7* | 43.8 + 11.2*      | <b>51.9 + 1.3</b> |
| HalfCheetah-M-10 <sup>3</sup> | 100           | 50          | 46              | 0      | 49.0 + 0.6        | 50.6 + 0.1        | 50.8 + 0.4        | 54.6 + 0.3        | 43.2 + 2.6* | 55.4 + 3.0        | <b>62.3 + 1.1</b> |
|                               |               |             |                 |        | 49.5 + 0.0        | 42.4 + 5.3*       | 28.4 + 0.0*       | 19.4 + 0.0*       | 27.2 + 6.7* | <b>57.0 + 0.0</b> | 36.9 + 27.8*      |
|                               |               |             |                 |        | 48.9 + 0.5        | 45.1 + 7.2*       | 50.9 + 0.4        | 48.7 + 3.6*       | 21.2 + 0.2* | 34.8 + 15.1*      | <b>55.4 + 1.7</b> |
| HalfCheetah-M-10 <sup>4</sup> | 100           | 50          | 46              | 0      | 50.0 + 0.4        | 49.6 + 0.9*       | 50.8 + 0.2        | <b>55.8 + 0.9</b> | 44.0 + 1.7* | 55.8 + 3.2        | 43.7 + 0.9*       |
|                               |               |             |                 |        | 49.9 + 0.0        | 31.0 + 1.1*       | 33.7 + 6.2*       | <b>55.2 + 1.6</b> | 25.5 + 0.4* | 46.0 + 9.7*       | 45.2 + 0.8*       |
|                               |               |             |                 |        | 49.6 + 0.0        | 41.4 + 8.6*       | 50.9 + 0.0        | 44.1 + 3.2*       | 42.0 + 0.0* | <b>55.7 + 0.0</b> | -2.3 + 0.0*       |
| HalfCheetah-H-10 <sup>2</sup> | 100           | 74          | 64              | 0      | 47.2 + 31.8       | 57.6 + 3.1        | 64.2 + 0.7        | <b>74.0 + 1.5</b> | 24.0 + 1.6* | 29.0 + 22.7*      | 47.8 + 8.2        |
|                               |               |             |                 |        | <b>69.6 + 0.0</b> | 47.9 + 0.0*       | 16.4 + 3.3*       | 1.6 + 0.4*        | 8.9 + 7.8*  | 47.2 + 0.0*       | 4.2 + 0.8*        |
|                               |               |             |                 |        | <b>69.7 + 0.1</b> | 28.6 + 20.0*      | 43.9 + 21.5*      | 21.9 + 27.9*      | 16.4 + 5.6* | 26.5 + 18.7*      | 23.9 + 18.4*      |
| HalfCheetah-H-10 <sup>3</sup> | 100           | 74          | 64              | 0      | 71.3 + 0.5        | 72.4 + 0.3        | 74.1 + 0.8        | <b>77.4 + 1.3</b> | 62.5 + 1.9* | 54.8 + 17.1*      | 65.9 + 10.3*      |
|                               |               |             |                 |        | <b>71.7 + 0.1</b> | 17.7 + 0.0*       | 31.0 + 1.9*       | 0.2 + 0.1*        | 9.3 + 0.0*  | 59.0 + 8.3*       | 3.5 + 4.2*        |
|                               |               |             |                 |        | 71.7 + 0.0        | 67.2 + 3.4*       | <b>74.6 + 0.8</b> | 2.3 + 1.0*        | 28.0 + 5.8* | 29.4 + 2.5*       | 11.0 + 2.4*       |
| HalfCheetah-H-10 <sup>4</sup> | 100           | 74          | 64              | 0      | 66.7 + 2.7        | 73.3 + 1.4        | 75.4 + 0.6        | <b>77.2 + 0.9</b> | 69.6 + 0.4  | 15.7 + 2.8*       | 7.6 + 6.3*        |
|                               |               |             |                 |        | <b>69.0 + 0.0</b> | 24.5 + 0.0*       | 18.8 + 4.7*       | 1.3 + 0.0*        | 25.4 + 0.5* | 26.3 + 0.0*       | 1.2 + 0.0*        |
|                               |               |             |                 |        | 68.4 + 0.0        | 52.2 + 21.5*      | <b>74.7 + 0.0</b> | 70.1 + 3.5        | 69.5 + 0.4  | 11.7 + 3.3*       | -2.4 + 0.0*       |

Table 27: Normalized score for Hopper tasks. For each task, three lines indicate the results of online evaluation, FQE evaluation, WIS evaluation respectively. Bold numbers indicate the best result for each task, while numbers marked by \* indicate results worse than BC. The task name is composed of the specific task, the quality of dataset, and the number of trajectories. L, M, and H stands for low, medium, high respectively. Det. is abbreviation of deterministic.

| Task Name                | Expert Policy | Det. Policy | Behavior Policy | Random | BC                 | BCQ               | PLAS              | CQL                | CRR               | BREMEN            | MOPO        |
|--------------------------|---------------|-------------|-----------------|--------|--------------------|-------------------|-------------------|--------------------|-------------------|-------------------|-------------|
| Hopper-L-10 <sup>2</sup> | 100           | 15          | 15              | 0      | 16.1 + 0.6         | 15.3 + 0.3*       | 15.6 + 0.3*       | <b>16.5 + 0.5</b>  | 16.4 + 1.3        | 15.4 + 0.9*       | 5.0 + 6.1*  |
|                          |               |             |                 |        | <b>16.1 + 0.6</b>  | 11.1 + 2.2*       | 7.0 + 5.8*        | 15.0 + 0.3*        | 15.7 + 0.0*       | 10.7 + 6.3*       | 1.4 + 0.1*  |
|                          |               |             |                 |        | <b>16.1 + 0.6</b>  | 12.1 + 0.0*       | 9.8 + 2.9*        | 15.9 + 0.8*        | 16.0 + 0.2*       | 1.1 + 0.0*        | 1.0 + 0.7*  |
| Hopper-L-10 <sup>3</sup> | 100           | 15          | 15              | 0      | 15.1 + 0.7         | 18.1 + 0.2        | 19.3 + 1.6        | 16.0 + 0.1         | 16.8 + 0.6        | <b>21.4 + 7.6</b> | 6.2 + 3.1*  |
|                          |               |             |                 |        | 15.1 + 0.7         | 14.9 + 3.8*       | <b>18.2 + 1.6</b> | 15.4 + 0.2         | 17.1 + 2.2        | 2.1 + 0.4*        | 0.5 + 0.9*  |
|                          |               |             |                 |        | 14.6 + 0.6         | 17.4 + 1.0        | 16.1 + 2.6        | 15.6 + 0.4         | <b>17.5 + 1.9</b> | 1.3 + 0.2*        | 3.7 + 0.0*  |
| Hopper-L-10 <sup>4</sup> | 100           | 15          | 15              | 0      | 15.5 + 0.3         | 18.7 + 1.4        | 17.4 + 1.5        | 15.7 + 0.0         | <b>20.9 + 4.3</b> | 15.3 + 1.5*       | 7.4 + 2.3*  |
|                          |               |             |                 |        | 15.6 + 0.4         | 14.4 + 2.9*       | 15.0 + 1.1*       | 15.1 + 0.7*        | <b>17.5 + 0.6</b> | 10.4 + 8.4*       | 0.3 + 0.5*  |
|                          |               |             |                 |        | 15.7 + 0.3         | <b>17.3 + 1.9</b> | 16.5 + 0.0        | 14.2 + 0.1*        | 16.2 + 1.5        | 8.2 + 0.0*        | 0.6 + 0.6*  |
| Hopper-M-10 <sup>2</sup> | 100           | 46          | 42              | 0      | 28.0 + 11.4        | 40.9 + 1.5        | 50.0 + 3.4        | <b>63.2 + 9.4</b>  | 41.5 + 9.8        | 28.5 + 6.3        | 1.8 + 2.6*  |
|                          |               |             |                 |        | 28.7 + 10.9        | 21.0 + 15.6*      | 30.6 + 7.0        | <b>43.0 + 8.4</b>  | 29.8 + 1.1        | 6.3 + 4.2*        | 1.0 + 0.7*  |
|                          |               |             |                 |        | 36.4 + 10.9        | 29.1 + 14.2*      | 30.6 + 7.0*       | <b>69.8 + 8.2</b>  | 36.4 + 2.0        | 5.9 + 2.4*        | 2.3 + 2.3*  |
| Hopper-M-10 <sup>3</sup> | 100           | 46          | 42              | 0      | 51.3 + 27.2        | 47.7 + 11.1*      | 61.2 + 25.8       | <b>64.5 + 7.0</b>  | 47.8 + 10.5*      | 24.7 + 5.5*       | 1.0 + 1.5*  |
|                          |               |             |                 |        | <b>71.1 + 26.2</b> | 33.0 + 13.8*      | 32.3 + 6.8*       | 57.3 + 1.4*        | 38.8 + 15.1*      | 21.3 + 0.0*       | -0.1 + 0.1* |
|                          |               |             |                 |        | 30.2 + 0.0         | 33.3 + 7.7        | 28.0 + 29.0*      | <b>53.5 + 0.2</b>  | 42.1 + 11.9       | 21.3 + 0.0*       | -0.0 + 0.0* |
| Hopper-M-10 <sup>4</sup> | 100           | 46          | 42              | 0      | 54.4 + 14.8        | 56.6 + 7.8        | 62.9 + 17.0       | <b>81.6 + 13.1</b> | 49.1 + 2.2*       | 46.1 + 14.1*      | 1.1 + 0.9*  |
|                          |               |             |                 |        | <b>56.8 + 0.0</b>  | 29.8 + 3.2*       | 14.3 + 0.0*       | 43.7 + 6.5*        | 35.1 + 19.5*      | 15.0 + 2.8*       | -0.1 + 0.0* |
|                          |               |             |                 |        | <b>61.6 + 6.8</b>  | 30.9 + 0.9*       | 7.3 + 4.9*        | 40.8 + 2.5*        | 4.6 + 0.0*        | 16.6 + 3.9*       | -0.1 + 0.1* |
| Hopper-H-10 <sup>2</sup> | 100           | 69          | 47              | 0      | 44.4 + 12.4        | 35.7 + 6.5*       | 57.4 + 6.9        | <b>69.7 + 8.6</b>  | 65.6 + 12.8       | 28.5 + 11.6*      | 7.6 + 8.4*  |
|                          |               |             |                 |        | 39.0 + 14.3        | 13.3 + 14.5*      | 10.8 + 2.8*       | <b>44.1 + 15.1</b> | 42.4 + 0.6        | 0.0 + 0.0*        | -0.0 + 0.1* |
|                          |               |             |                 |        | 29.0 + 0.0         | 8.6 + 0.0*        | 14.3 + 6.8*       | <b>46.0 + 11.6</b> | 38.4 + 16.3       | 0.0 + 0.0*        | 0.5 + 0.8*  |
| Hopper-H-10 <sup>3</sup> | 100           | 69          | 47              | 0      | 43.1 + 8.3         | 51.3 + 10.2       | 76.0 + 4.5        | <b>76.6 + 1.3</b>  | 55.0 + 2.0        | 32.8 + 14.5*      | 11.5 + 5.8* |
|                          |               |             |                 |        | 43.1 + 8.3         | 24.8 + 21.9*      | 26.1 + 9.3*       | <b>51.9 + 23.2</b> | 13.8 + 3.7*       | 17.1 + 0.3*       | 0.0 + 0.0*  |
|                          |               |             |                 |        | 41.3 + 9.3         | 26.5 + 0.6*       | 24.1 + 1.6*       | <b>69.2 + 4.5</b>  | 26.4 + 15.0*      | 31.5 + 15.5*      | 0.0 + 0.0*  |
| Hopper-H-10 <sup>4</sup> | 100           | 69          | 47              | 0      | 49.5 + 14.1        | 28.1 + 5.3*       | 66.1 + 10.0       | <b>81.6 + 7.3</b>  | 62.4 + 5.0        | 47.3 + 27.3*      | 5.7 + 7.8*  |
|                          |               |             |                 |        | 50.3 + 13.5        | 13.2 + 18.1*      | 27.1 + 6.2*       | <b>74.3 + 17.3</b> | 29.7 + 34.1*      | 15.2 + 0.0*       | -0.0 + 0.1* |
|                          |               |             |                 |        | 50.3 + 13.5        | 22.8 + 0.0*       | 40.6 + 15.5*      | <b>87.6 + 4.6</b>  | 38.3 + 28.6*      | 12.9 + 0.0*       | 1.0 + 0.0*  |

Table 28: Normalized score for Walker2d tasks. For each task, three lines indicate the results of online evaluation, FQE evaluation, WIS evaluation respectively. Bold numbers indicate the best result for each task, while numbers marked by \* indicate results worse than BC. The task name is composed of the specific task, the quality of dataset, and the number of trajectories. L, M, and H stands for low, medium, high respectively. Det. is abbreviation of deterministic.

| Task Name                  | Expert Policy | Det. Policy | Behavior Policy | Random | BC                | BCQ               | PLAS              | CQL               | CRR               | BREMEN       | MOPO         |
|----------------------------|---------------|-------------|-----------------|--------|-------------------|-------------------|-------------------|-------------------|-------------------|--------------|--------------|
| Walker2d-L-10 <sup>2</sup> | 100           | 30          | 24              | 0      | 29.1 + 3.5        | 22.2 + 0.3*       | 33.0 + 5.1        | 30.3 + 1.0        | <b>36.4 + 4.8</b> | 21.8 + 20.8* | 9.7 + 9.1*   |
|                            |               |             |                 |        | <b>29.1 + 3.5</b> | 20.6 + 0.5*       | 10.7 + 0.5*       | 16.3 + 12.8*      | 27.1 + 4.2*       | 3.4 + 2.9*   | 4.5 + 3.7*   |
|                            |               |             |                 |        | <b>28.6 + 0.0</b> | 7.4 + 0.2*        | 10.5 + 2.5*       | 8.4 + 12.2*       | 28.3 + 7.3*       | 7.2 + 1.7*   | 3.8 + 1.5*   |
| Walker2d-L-10 <sup>3</sup> | 100           | 30          | 24              | 0      | 28.5 + 1.9        | 38.0 + 4.5        | 42.1 + 10.3       | <b>44.7 + 2.7</b> | 34.1 + 1.8        | 32.4 + 8.7   | 11.6 + 14.1* |
|                            |               |             |                 |        | 27.1 + 0.1        | 26.8 + 4.9*       | 16.6 + 22.1*      | <b>45.8 + 1.6</b> | 19.4 + 10.6*      | 8.8 + 5.0*   | 0.7 + 1.2*   |
|                            |               |             |                 |        | 29.9 + 1.9        | 29.3 + 9.9*       | 4.5 + 1.6*        | <b>31.6 + 1.3</b> | 6.3 + 6.1*        | 12.4 + 4.8*  | 0.9 + 0.7*   |
| Walker2d-L-10 <sup>4</sup> | 100           | 30          | 24              | 0      | 31.9 + 2.4        | 39.1 + 3.6        | 31.1 + 6.5*       | <b>40.2 + 1.4</b> | 33.2 + 7.3        | 29.4 + 4.8*  | 11.5 + 13.9* |
|                            |               |             |                 |        | 32.7 + 0.0        | 29.6 + 6.3*       | 0.1 + 0.6*        | <b>39.0 + 0.0</b> | 29.7 + 1.0*       | 1.4 + 0.4*   | -0.2 + 0.0*  |
|                            |               |             |                 |        | 30.0 + 1.9        | <b>38.6 + 0.0</b> | 1.4 + 1.6*        | 33.1 + 0.0        | 30.3 + 11.1       | 2.4 + 1.2*   | -0.3 + 0.1*  |
| Walker2d-M-10 <sup>2</sup> | 100           | 49          | 43              | 0      | 50.2 + 4.0        | 42.0 + 1.0*       | 51.6 + 1.7        | <b>53.2 + 2.5</b> | 39.5 + 4.8*       | 37.6 + 26.5* | 20.1 + 15.5* |
|                            |               |             |                 |        | <b>50.2 + 4.0</b> | 8.7 + 0.6*        | 26.2 + 18.1*      | 37.2 + 9.3*       | 36.1 + 7.0*       | 15.3 + 11.2* | 8.9 + 7.1*   |
|                            |               |             |                 |        | 47.4 + 0.1        | 39.4 + 2.9*       | <b>53.7 + 0.0</b> | 47.9 + 3.1        | 33.5 + 7.6*       | 14.1 + 20.1* | 0.5 + 1.2*   |
| Walker2d-M-10 <sup>3</sup> | 100           | 49          | 43              | 0      | 48.7 + 1.9        | <b>61.7 + 0.5</b> | 34.6 + 13.2*      | 57.3 + 1.0        | 44.7 + 6.9*       | 37.5 + 16.6* | 39.9 + 2.0*  |
|                            |               |             |                 |        | <b>47.6 + 2.1</b> | 47.3 + 10.4*      | -0.3 + 0.0*       | 45.8 + 0.6*       | 34.2 + 3.7*       | 3.0 + 0.4*   | 12.2 + 7.1*  |
|                            |               |             |                 |        | 48.7 + 1.9        | <b>52.7 + 9.8</b> | -0.2 + 0.1*       | 48.6 + 7.8*       | 10.1 + 11.4*      | 24.6 + 14.1* | -0.1 + 0.0*  |
| Walker2d-M-10 <sup>4</sup> | 100           | 49          | 43              | 0      | 54.4 + 3.5        | <b>60.2 + 1.4</b> | 47.5 + 1.5*       | 58.6 + 1.2        | 54.8 + 2.5        | 41.5 + 2.3*  | 31.9 + 20.3* |
|                            |               |             |                 |        | <b>56.1 + 1.5</b> | 51.6 + 11.3*      | 0.2 + 0.3*        | 10.8 + 6.4*       | 38.6 + 2.6*       | 10.0 + 1.5*  | 5.4 + 7.7*   |
|                            |               |             |                 |        | 55.1 + 0.0        | <b>58.6 + 4.6</b> | 1.0 + 1.7*        | 46.9 + 3.9*       | 39.8 + 1.1*       | 19.0 + 15.5* | 18.4 + 23.1* |
| Walker2d-H-10 <sup>2</sup> | 100           | 69          | 57              | 0      | 64.1 + 4.9        | 47.6 + 4.5*       | 65.6 + 0.6        | <b>74.3 + 0.3</b> | 14.8 + 6.1*       | 24.3 + 31.9* | 23.2 + 3.6*  |
|                            |               |             |                 |        | 67.0 + 5.4        | 19.5 + 15.8*      | 4.7 + 4.5*        | <b>73.4 + 1.1</b> | 11.6 + 4.2*       | 3.4 + 0.0*   | 14.8 + 9.7*  |
|                            |               |             |                 |        | 61.2 + 1.3        | 38.3 + 12.6*      | <b>65.8 + 0.5</b> | 59.6 + 3.9*       | 12.1 + 3.8*       | 6.5 + 4.4*   | 11.6 + 2.8*  |
| Walker2d-H-10 <sup>3</sup> | 100           | 69          | 57              | 0      | 72.6 + 4.2        | <b>76.6 + 2.8</b> | 57.0 + 9.4*       | 75.3 + 1.9        | 67.1 + 9.6*       | 48.0 + 20.6* | 18.0 + 3.0*  |
|                            |               |             |                 |        | <b>74.4 + 0.0</b> | 69.7 + 7.2*       | -0.3 + 0.0*       | 33.1 + 12.4*      | 57.9 + 11.3*      | 18.2 + 9.2*  | -0.2 + 0.0*  |
|                            |               |             |                 |        | 71.9 + 3.5        | <b>72.8 + 1.7</b> | 21.4 + 30.8*      | 60.9 + 10.1*      | 62.0 + 11.0*      | 32.7 + 16.4* | -0.2 + 0.0*  |
| Walker2d-H-10 <sup>4</sup> | 100           | 69          | 57              | 0      | 58.3 + 8.4        | <b>77.9 + 1.4</b> | 36.3 + 4.5*       | 74.9 + 0.8        | 71.7 + 7.0        | 48.0 + 9.5*  | 17.7 + 0.8*  |
|                            |               |             |                 |        | <b>60.1 + 9.3</b> | 51.6 + 16.3*      | 1.5 + 2.5*        | 43.1 + 20.0*      | 14.9 + 21.2*      | 4.6 + 3.8*   | 1.3 + 3.3*   |
|                            |               |             |                 |        | 66.7 + 0.0        | <b>79.3 + 0.1</b> | 1.8 + 0.0*        | 74.0 + 1.3        | 73.8 + 8.0        | 1.9 + 0.0*   | 7.8 + 7.5*   |

Table 29: Normalized score for IB tasks. For each task, three lines indicate the results of online evaluation, FQE evaluation, WIS evaluation respectively. Bold numbers indicate the best result for each task, while numbers marked by \* indicate results worse than BC. The task name is composed of the specific task, the quality of dataset, and the number of trajectories. L, M, and H stands for low, medium, high respectively. Det. is abbreviation of deterministic.

| Task Name            | Expert Policy | Det. Policy | Behavior Policy | Random | BC                 | BCQ             | PLAS            | CQL               | CRR                 | BREMEN           | MOPO             |
|----------------------|---------------|-------------|-----------------|--------|--------------------|-----------------|-----------------|-------------------|---------------------|------------------|------------------|
| IB-L-10 <sup>2</sup> | 100           | -19         | -19             | 0      | -19.8 + 1.6        | -287.5 + 155.5* | -34.9 + 23.6*   | <b>2.5 + 3.2</b>  | -5.3 + 14.4         | -34.5 + 24.7*    | -181.0 + 162.7*  |
|                      |               |             |                 |        | -19.2 + 1.8        | -68.0 + 0.0*    | -68.0 + 0.0*    | -65.2 + 0.0*      | <b>-17.9 + 3.9</b>  | -1598.8 + 0.0*   | -1703.9 + 0.5*   |
|                      |               |             |                 |        | <b>-19.2 + 1.8</b> | -411.2 + 0.1*   | -182.8 + 162.5* | -150.2 + 160.9*   | -153.6 + 181.3*     | -97.0 + 44.6*    | -240.8 + 140.2*  |
| IB-L-10 <sup>3</sup> | 100           | -19         | -19             | 0      | -16.2 + 2.7        | -177.2 + 155.1* | -30.5 + 26.6*   | <b>-0.4 + 4.5</b> | -5.3 + 17.1         | -37.3 + 21.6*    | -163.4 + 177.7*  |
|                      |               |             |                 |        | <b>-14.4 + 0.2</b> | -68.0 + 0.3*    | -68.1 + 0.0*    | -53.8 + 27.7*     | -21.7 + 10.2*       | -19.3 + 6.2*     | -1704.1 + 0.3*   |
|                      |               |             |                 |        | -20.0 + 0.0        | -68.2 + 0.3*    | -68.1 + 0.0*    | -179.0 + 139.9*   | <b>-14.6 + 18.2</b> | -283.9 + 0.0*    | -1158.9 + 771.6* |
| IB-L-10 <sup>4</sup> | 100           | -19         | -19             | 0      | -18.6 + 3.0        | -177.6 + 155.4* | -146.5 + 187.9* | -6.2 + 13.9       | <b>-1.5 + 11.9</b>  | -122.6 + 46.3*   | -171.7 + 171.1*  |
|                      |               |             |                 |        | <b>-22.6 + 0.0</b> | -68.2 + 0.1*    | -68.1 + 0.2*    | -135.4 + 99.5*    | 47.9 + 21.6*        | -101.3 + 23.2*   | -1158.4 + 771.2* |
|                      |               |             |                 |        | -17.9 + 3.3        | -67.9 + 0.2*    | -182.5 + 162.4* | <b>3.7 + 2.8</b>  | -17.4 + 0.0         | -68.6 + 0.0*     | -2.0 + 0.0       |
| IB-M-10 <sup>2</sup> | 100           | 25          | 25              | 0      | -9.2 + 46.9        | -177.7 + 155.2* | -291.7 + 160.4* | 24.4 + 4.9        | <b>25.6 + 3.8</b>   | -97.8 + 104.1*   | -59.8 + 5.7*     |
|                      |               |             |                 |        | 18.2 + 0.0         | -67.9 + 0.1*    | -182.6 + 162.0* | -27.9 + 21.5*     | <b>21.1 + 0.0</b>   | -349.4 + 0.0*    | -224.6 + 140.9*  |
|                      |               |             |                 |        | <b>25.7 + 5.3</b>  | -182.6 + 162.2* | -297.8 + 162.5* | -125.6 + 187.0*   | -3.1 + 41.7*        | -214.7 + 314.9*  | -612.6 + 771.3*  |
| IB-M-10 <sup>3</sup> | 100           | 25          | 25              | 0      | 27.1 + 0.4         | -181.6 + 161.0* | -182.7 + 161.9* | 25.2 + 1.6*       | <b>28.9 + 2.9</b>   | -16.0 + 32.6*    | -119.2 + 85.7*   |
|                      |               |             |                 |        | <b>26.6 + 0.0</b>  | -67.7 + 0.2*    | -67.6 + 0.0*    | -237.2 + 0.0*     | 8.7 + 0.0*          | -207.3 + 117.1*  | -67.3 + 0.0*     |
|                      |               |             |                 |        | <b>27.3 + 0.2</b>  | -297.3 + 162.1* | -412.0 + 0.3*   | -1679.1 + 0.0*    | 27.2 + 1.2*         | 4.1 + 1.5*       | -123.1 + 80.2*   |
| IB-M-10 <sup>4</sup> | 100           | 25          | 25              | 0      | 27.7 + 2.7         | -181.5 + 163.1* | -182.6 + 162.3* | 26.9 + 6.4*       | <b>30.4 + 0.4</b>   | 1.6 + 18.4*      | -48.8 + 26.2*    |
|                      |               |             |                 |        | 29.4 + 0.7         | -67.8 + 0.1*    | -67.7 + 0.0*    | -56.1 + 13.0*     | <b>31.3 + 0.0</b>   | 28.8 + 0.3*      | -1704.2 + 0.0*   |
|                      |               |             |                 |        | 27.3 + 2.3         | -67.7 + 0.3*    | -67.7 + 0.0*    | -14.8 + 32.2*     | <b>28.5 + 2.8</b>   | -395.9 + 0.0*    | -1704.2 + 0.0*   |
| IB-H-10 <sup>2</sup> | 100           | 70          | 70              | 0      | 57.8 + 30.5        | -288.6 + 77.0*  | -178.5 + 78.5*  | 32.9 + 27.0*      | <b>73.2 + 0.1</b>   | -89.1 + 108.5*   | -77.0 + 70.0*    |
|                      |               |             |                 |        | <b>72.0 + 0.0</b>  | -842.3 + 609.1* | -183.1 + 162.3* | -140.5 + 192.0*   | -493.7 + 801.7*     | -1055.0 + 457.8* | -269.4 + 146.2*  |
|                      |               |             |                 |        | 62.4 + 33.2        | -241.3 + 0.2*   | -594.5 + 744.6* | -25.1 + 67.9*     | <b>72.8 + 0.1</b>   | -811.5 + 695.3*  | -116.1 + 77.7*   |
| IB-H-10 <sup>3</sup> | 100           | 70          | 70              | 0      | 9.4 + 88.0         | -297.9 + 80.7*  | -171.4 + 146.4* | 15.5 + 48.9       | <b>69.7 + 0.1</b>   | -31.5 + 113.4*   | -97.5 + 89.6*    |
|                      |               |             |                 |        | -31.6 + 77.9       | -398.4 + 0.0*   | -68.1 + 0.2*    | -165.7 + 86.4*    | <b>69.6 + 0.0</b>   | -114.8 + 85.0*   | -158.6 + 114.9*  |
|                      |               |             |                 |        | -94.1 + 29.7       | -241.5 + 0.0*   | -297.7 + 80.3*  | -575.7 + 331.5*   | <b>72.2 + 0.5</b>   | -1145.9 + 687.5* | -239.1 + 3.2*    |
| IB-H-10 <sup>4</sup> | 100           | 70          | 70              | 0      | -34.2 + 111.3      | -183.1 + 81.4*  | -184.7 + 82.1*  | 34.2 + 34.1       | <b>61.7 + 15.6</b>  | -5.6 + 11.5      | -127.2 + 84.8*   |
|                      |               |             |                 |        | -9.4 + 124.6       | -412.0 + 0.0*   | -412.1 + 0.1*   | -130.6 + 89.0*    | <b>50.4 + 15.2</b>  | -12.1 + 4.6*     | -309.0 + 135.5*  |
|                      |               |             |                 |        | -185.6 + 0.0       | -241.2 + 0.7*   | -240.2 + 0.0*   | -1220.8 + 681.9*  | <b>39.6 + 0.0</b>   | 0.4 + 0.0        | -241.0 + 0.0*    |

Table 30: Normalized score for FinRL tasks. For each task, three lines indicate the results of online evaluation, FQE evaluation, WIS evaluation respectively. Bold numbers indicate the best result for each task, while numbers marked by \* indicate results worse than BC. The task name is composed of the specific task, the quality of dataset, and the number of trajectories. L, M, and H stands for low, medium, high respectively. Det. is abbreviation of deterministic.

| Task Name               | Expert Policy | Det. Policy | Behavior Policy | Random | BC                  | BCQ           | PLAS                | CQL                 | CRR           | BREMEN                | MOPO         |
|-------------------------|---------------|-------------|-----------------|--------|---------------------|---------------|---------------------|---------------------|---------------|-----------------------|--------------|
| FinRL-L-10 <sup>2</sup> | 100           | -13         | -12             | 0      | 34.8 +- 60.2        | 23.2 +- 7.9*  | 24.2 +- 4.2*        | <b>48.3 +- 3.5</b>  | 7.5 +- 1.0*   | 34.8 +- 60.3          | 18.6 +- 5.7* |
|                         |               |             |                 |        | 37.5 +- 58.2        | 32.9 +- 1.4*  | 24.2 +- 4.2*        | 30.4 +- 17.1*       | 6.7 +- 0.0*   | <b>119.9 +- 0.1</b>   | 18.6 +- 5.7* |
|                         |               |             |                 |        | 34.8 +- 60.2        | 26.8 +- 9.0*  | 24.4 +- 4.9*        | 49.4 +- 4.9         | -0.6 +- 10.4* | <b>78.8 +- 58.3</b>   | 18.8 +- 5.5* |
| FinRL-L-10 <sup>3</sup> | 100           | -13         | -12             | 0      | 18.9 +- 10.0        | 30.4 +- 6.8   | 62.6 +- 20.1        | <b>66.2 +- 2.3</b>  | 24.7 +- 12.3  | 51.7 +- 49.5          | 17.6 +- 6.5* |
|                         |               |             |                 |        | 11.6 +- 9.8         | 37.0 +- 2.0   | <b>73.6 +- 25.3</b> | 55.5 +- 15.0        | 16.1 +- 1.0   | 9.6 +- 1.4*           | 16.4 +- 7.8  |
|                         |               |             |                 |        | 26.1 +- 0.5         | 34.7 +- 4.6   | <b>56.7 +- 24.3</b> | 11.9 +- 9.5*        | 26.3 +- 10.5  | 21.7 +- 3.4*          | 13.9 +- 1.8* |
| FinRL-M-10 <sup>2</sup> | 100           | 22          | 35              | 0      | 77.3 +- 74.5        | 21.3 +- 1.8*  | 33.1 +- 19.6*       | <b>84.2 +- 27.8</b> | 37.2 +- 9.5*  | 77.3 +- 74.5          | 21.1 +- 6.2* |
|                         |               |             |                 |        | 64.1 +- 82.1        | 20.1 +- 1.4*  | 24.2 +- 22.4*       | <b>71.8 +- 37.1</b> | 24.6 +- 10.9* | 6.0 +- 0.0*           | 25.2 +- 5.9* |
|                         |               |             |                 |        | 77.3 +- 74.5        | 20.5 +- 2.2*  | 29.6 +- 20.3*       | 36.2 +- 17.0*       | 19.6 +- 12.6* | <b>102.1 +- 72.2</b>  | 22.9 +- 4.5* |
| FinRL-M-10 <sup>3</sup> | 100           | 22          | 35              | 0      | 6.4 +- 9.7          | 29.1 +- 14.5  | 50.9 +- 12.6        | 56.9 +- 25.7        | 33.0 +- 9.3   | <b>150.3 +- 100.0</b> | 20.5 +- 5.9  |
|                         |               |             |                 |        | 1.4 +- 4.0          | 36.2 +- 10.4  | 11.8 +- 15.1        | 31.7 +- 23.3        | 19.4 +- 22.0  | <b>87.5 +- 68.8</b>   | 24.8 +- 5.7  |
|                         |               |             |                 |        | 14.2 +- 7.1         | 31.6 +- 12.0  | 42.4 +- 18.1        | 38.9 +- 29.1        | 22.2 +- 22.2  | <b>148.5 +- 102.4</b> | 18.1 +- 8.0  |
| FinRL-H-10 <sup>2</sup> | 100           | 55          | 50              | 0      | 48.5 +- 26.2        | 16.6 +- 19.7* | 42.0 +- 27.6*       | 57.6 +- 27.0        | 43.2 +- 20.3* | <b>70.6 +- 63.9</b>   | 19.8 +- 6.0* |
|                         |               |             |                 |        | <b>69.9 +- 14.6</b> | 0.4 +- 9.1*   | 41.8 +- 15.7*       | 48.8 +- 14.0*       | 15.4 +- 14.0* | 5.6 +- 7.5*           | 16.8 +- 1.8* |
|                         |               |             |                 |        | 37.4 +- 30.3        | 9.7 +- 18.0*  | 22.9 +- 29.1*       | 29.8 +- 3.7*        | 12.7 +- 1.4*  | <b>58.9 +- 30.2</b>   | 16.8 +- 1.8* |
| FinRL-H-10 <sup>3</sup> | 100           | 55          | 50              | 0      | 14.2 +- 26.7        | 22.3 +- 19.8  | 52.9 +- 16.1        | 51.4 +- 20.4        | 35.9 +- 23.0  | <b>69.8 +- 65.9</b>   | 19.2 +- 6.9  |
|                         |               |             |                 |        | 27.6 +- 30.5        | 20.0 +- 17.8* | <b>46.2 +- 2.0</b>  | 45.0 +- 1.3         | 34.4 +- 19.7  | 6.0 +- 30.6*          | 15.9 +- 2.9* |
|                         |               |             |                 |        | 0.8 +- 11.5         | 19.4 +- 18.2  | <b>47.5 +- 11.4</b> | 26.3 +- 5.1         | 27.4 +- 17.2  | 32.8 +- 33.8          | 25.1 +- 4.4  |

Table 31: Normalized score for CL tasks. For each task, three lines indicate the results of online evaluation, FQE evaluation, WIS evaluation respectively. Bold numbers indicate the best result for each task, while numbers marked by \* indicate results worse than BC. The task name is composed of the specific task, the quality of dataset, and the number of trajectories. L, M, and H stands for low, medium, high respectively. Det. is abbreviation of deterministic.

| Task Name            | Expert Policy | Det. Policy | Behavior Policy | Random | BC                  | BCQ           | PLAS          | CQL                | CRR                 | BREMEN              | MOPO         |
|----------------------|---------------|-------------|-----------------|--------|---------------------|---------------|---------------|--------------------|---------------------|---------------------|--------------|
| CL-L-10 <sup>2</sup> | 100           | 35          | 38              | 0      | 30.3 +- 10.1        | 17.3 +- 3.6*  | 35.1 +- 3.4   | 40.1 +- 1.4        | <b>44.7 +- 0.8</b>  | 27.8 +- 9.5*        | 10.8 +- 1.6* |
|                      |               |             |                 |        | 16.9 +- 0.0         | 20.3 +- 1.0   | 12.3 +- 0.0*  | 21.7 +- 0.0        | <b>42.3 +- 2.7</b>  | 17.6 +- 0.4         | 9.4 +- 1.4*  |
|                      |               |             |                 |        | 25.1 +- 11.6        | 17.3 +- 3.6*  | 30.5 +- 7.3   | 32.0 +- 7.8        | <b>39.7 +- 3.4</b>  | 16.1 +- 1.5*        | 10.2 +- 0.6* |
| CL-L-10 <sup>3</sup> | 100           | 35          | 38              | 0      | 38.6 +- 1.8         | 25.0 +- 1.4*  | 35.8 +- 2.5*  | <b>46.9 +- 1.5</b> | 41.3 +- 2.0         | 40.1 +- 1.3         | 10.8 +- 1.7* |
|                      |               |             |                 |        | 37.3 +- 0.1         | 22.6 +- 0.7*  | 25.4 +- 0.0*  | <b>39.3 +- 0.0</b> | 39.0 +- 3.3         | 36.5 +- 4.6*        | 11.7 +- 0.3* |
|                      |               |             |                 |        | 38.6 +- 1.8         | 22.9 +- 3.8*  | 27.2 +- 2.6*  | <b>38.8 +- 2.7</b> | 37.7 +- 0.6*        | 33.9 +- 4.9*        | 11.4 +- 0.5* |
| CL-L-10 <sup>4</sup> | 100           | 35          | 38              | 0      | 38.3 +- 1.5         | 21.6 +- 0.8*  | 36.9 +- 4.1*  | <b>46.4 +- 1.7</b> | 42.8 +- 0.8         | 39.5 +- 1.0         | 10.9 +- 2.6* |
|                      |               |             |                 |        | 38.3 +- 1.5         | 23.1 +- 0.4*  | 22.1 +- 0.0*  | <b>41.8 +- 0.5</b> | 37.9 +- 0.2*        | 37.9 +- 0.8*        | 9.7 +- 0.0*  |
|                      |               |             |                 |        | 38.3 +- 1.5         | 19.9 +- 2.6*  | 28.5 +- 9.1*  | <b>40.5 +- 0.0</b> | 39.9 +- 3.4         | 38.3 +- 0.2         | 7.9 +- 0.1*  |
| CL-M-10 <sup>2</sup> | 100           | 63          | 60              | 0      | 68.3 +- 5.6         | 29.9 +- 10.5* | 56.9 +- 3.9*  | 66.8 +- 5.1*       | <b>82.8 +- 0.9</b>  | 63.6 +- 12.7*       | 10.1 +- 2.6* |
|                      |               |             |                 |        | 66.1 +- 3.4         | 19.1 +- 0.4*  | 43.2 +- 22.1* | 45.2 +- 10.9*      | <b>75.2 +- 6.0</b>  | 24.8 +- 7.9*        | 8.9 +- 2.3*  |
|                      |               |             |                 |        | 70.7 +- 3.1         | 24.2 +- 3.6*  | 27.9 +- 17.1* | 33.1 +- 6.7*       | <b>74.6 +- 8.0</b>  | 46.0 +- 13.5*       | 9.3 +- 0.4*  |
| CL-M-10 <sup>3</sup> | 100           | 63          | 60              | 0      | 63.3 +- 8.0         | 24.4 +- 3.5*  | 58.5 +- 6.2*  | 75.0 +- 0.6        | 74.2 +- 1.2         | <b>77.7 +- 12.5</b> | 10.8 +- 1.4* |
|                      |               |             |                 |        | 57.4 +- 7.6         | 20.2 +- 0.7*  | 35.5 +- 17.8* | 58.2 +- 0.7        | 74.9 +- 1.0         | <b>76.2 +- 13.6</b> | 9.0 +- 0.1*  |
|                      |               |             |                 |        | 68.2 +- 0.0         | 24.3 +- 0.9*  | 61.4 +- 5.1*  | <b>74.3 +- 3.3</b> | 70.2 +- 3.0         | 70.2 +- 2.3         | 9.0 +- 0.3*  |
| CL-M-10 <sup>4</sup> | 100           | 63          | 60              | 0      | 59.4 +- 15.8        | 22.1 +- 6.6*  | 56.7 +- 2.9*  | <b>77.1 +- 1.4</b> | 75.4 +- 0.6         | 58.7 +- 18.7*       | 10.1 +- 1.4* |
|                      |               |             |                 |        | 37.1 +- 0.0         | 13.1 +- 0.0*  | 55.3 +- 7.1   | 60.9 +- 2.6        | <b>75.3 +- 0.7</b>  | 15.5 +- 0.3*        | 10.9 +- 0.8* |
|                      |               |             |                 |        | 70.0 +- 0.0         | 13.0 +- 0.0*  | 41.6 +- 21.7* | 67.4 +- 9.4*       | <b>72.4 +- 1.9</b>  | 45.7 +- 21.4*       | 7.3 +- 0.7*  |
| CL-H-10 <sup>2</sup> | 100           | 94          | 95              | 0      | 110.5 +- 6.8        | 31.6 +- 13.8* | 88.2 +- 5.9*  | 100.8 +- 2.4*      | <b>119.3 +- 4.8</b> | 112.9 +- 6.4        | 11.9 +- 0.8* |
|                      |               |             |                 |        | 105.1 +- 5.0        | 12.3 +- 0.1*  | 24.5 +- 1.1*  | 49.2 +- 7.6*       | 109.5 +- 10.1       | <b>117.4 +- 0.8</b> | 10.2 +- 1.0* |
|                      |               |             |                 |        | <b>110.5 +- 6.8</b> | 30.4 +- 3.7*  | 66.8 +- 30.3* | 74.0 +- 27.1*      | 109.7 +- 12.4*      | 81.8 +- 44.1*       | 9.9 +- 0.9*  |
| CL-H-10 <sup>3</sup> | 100           | 94          | 95              | 0      | 106.7 +- 1.6        | 37.5 +- 11.5* | 91.7 +- 9.3*  | 104.7 +- 5.7*      | <b>114.2 +- 2.2</b> | 110.7 +- 3.8        | 9.9 +- 0.7*  |
|                      |               |             |                 |        | <b>108.0 +- 0.0</b> | 26.0 +- 0.3*  | 20.7 +- 0.1*  | 84.6 +- 4.2*       | 104.6 +- 3.9*       | 75.6 +- 9.1*        | 8.2 +- 0.3*  |
|                      |               |             |                 |        | 105.6 +- 1.7        | 27.7 +- 2.2*  | 83.5 +- 23.1* | 102.6 +- 5.0*      | <b>107.8 +- 2.7</b> | 106.3 +- 5.2        | 8.5 +- 0.4*  |
| CL-H-10 <sup>4</sup> | 100           | 94          | 95              | 0      | 98.5 +- 12.4        | 47.1 +- 18.2* | 92.5 +- 8.7*  | 107.2 +- 7.3       | <b>113.0 +- 2.8</b> | 79.9 +- 44.8*       | 10.8 +- 2.7* |
|                      |               |             |                 |        | 89.9 +- 12.5        | 46.7 +- 1.2*  | 18.5 +- 0.0*  | 68.9 +- 0.5*       | <b>111.5 +- 0.0</b> | 19.1 +- 0.7*        | 9.9 +- 0.0*  |
|                      |               |             |                 |        | 107.5 +- 0.0        | 68.1 +- 1.6*  | 97.4 +- 0.5*  | 100.6 +- 4.7*      | <b>113.3 +- 4.0</b> | 94.5 +- 25.6*       | 8.8 +- 0.4*  |

Table 32: Normalized score for SP task. Policies are measured by their episode return averaged over 3 episodes. Bold numbers indicate the best result for each task, while numbers marked by \* indicate results worse than BC. The task name is composed of the specific task, the quality of dataset, and the number of trajectories. Det. is abbreviation of deterministic.

| Task Name                | Expert Policy | Det. Policy | Behavior Policy | Random | BC           | BCQ          | PLAS                | CQL                | CRR           | BREMEN         | MOPO           |
|--------------------------|---------------|-------------|-----------------|--------|--------------|--------------|---------------------|--------------------|---------------|----------------|----------------|
| SP-human-10 <sup>4</sup> | 100           | 8           | 8               | 0      | -43.7 +- 4.6 | 90.0 +- 0.0  | <b>110.5 +- 7.5</b> | 55.4 +- 44.1       | 17.8 +- 42.6  | -39.7 +- 8.9   | 51.0 +- 104.5  |
|                          |               |             |                 |        | -43.7 +- 4.6 | 85.1 +- 0.0  | -29.2 +- 0.0        | <b>85.2 +- 0.0</b> | -30.0 +- 25.1 | -60.9 +- 31.0* | 85.2 +- 0.0    |
|                          |               |             |                 |        | -46.9 +- 0.1 | 42.8 +- 59.8 | <b>73.3 +- 72.5</b> | -56.6 +- 35.3*     | -1.9 +- 44.0  | -46.5 +- 1.0   | -75.2 +- 21.5* |

Table 33: Raw score for HalfCheetah tasks. For each task, three lines indicate the results of online evaluation, FQE evaluation, WIS evaluation respectively. Bold numbers indicate the best result for each task, while numbers marked by \* indicate results worse than BC. The task name is composed of the specific task, the quality of dataset, and the number of trajectories. L, M, and H stands for low, medium, high respectively. Det. is abbreviation of deterministic.

| Task Name                     | Expert Policy | Det. Policy | Behavior Policy | Random | BC                   | BCQ                  | PLAS                  | CQL                   | CRR             | BREMEN                | MOPO                  |
|-------------------------------|---------------|-------------|-----------------|--------|----------------------|----------------------|-----------------------|-----------------------|-----------------|-----------------------|-----------------------|
| HalfCheetah-L-10 <sup>2</sup> | 12284         | 3195        | 2871            | -298   | 3364.8 + 43.1        | 3499.4 + 42.6        | 3330.7 + 51.8*        | 3801.4 + 33.8         | 3357.0 + 20.4*  | 4433.0 + 222.9        | <b>4980.7 + 231.3</b> |
|                               |               |             |                 |        | 3334.4 + 43.3        | 3427.5 + 0.0         | 2915.9 + 439.6*       | 3667.0 + 104.7        | 3347.2 + 0.0    | <b>4298.5 + 44.0</b>  | 4265.4 + 242.8        |
|                               |               |             |                 |        | 3395.7 + 0.0         | 3048.0 + 198.8*      | 3221.3 + 23.0*        | 3506.6 + 201.7        | 3221.9 + 82.1*  | 4012.2 + 424.0        | <b>4141.1 + 546.5</b> |
| HalfCheetah-L-10 <sup>3</sup> | 12284         | 3195        | 2871            | -298   | 3363.8 + 27.0        | 3993.0 + 49.9        | 3548.5 + 3.8          | 4512.4 + 65.5         | 3372.6 + 24.4   | 4681.1 + 230.9        | <b>4741.1 + 117.2</b> |
|                               |               |             |                 |        | 3350.9 + 0.0         | 4024.3 + 0.0         | 3541.5 + 3.8          | <b>4312.7 + 83.5</b>  | 3302.4 + 71.3*  | 2671.5 + 0.0*         | 2833.0 + 2432.8*      |
|                               |               |             |                 |        | 3359.9 + 29.4        | 3696.0 + 19.9        | 3384.5 + 0.0          | 3139.3 + 439.3*       | 3355.9 + 36.1*  | 2492.1 + 43.9*        | <b>3916.6 + 248.0</b> |
| HalfCheetah-L-10 <sup>4</sup> | 12284         | 3195        | 2871            | -298   | 3332.9 + 17.5        | 4320.2 + 87.6        | 3549.7 + 30.1         | <b>4715.6 + 177.4</b> | 3393.8 + 65.3   | 4621.9 + 36.1         | 4442.4 + 39.9         |
|                               |               |             |                 |        | 3347.2 + 0.0         | 4189.4 + 144.2       | 3489.1 + 57.6         | <b>4606.1 + 145.3</b> | 3341.2 + 26.3*  | 4598.1 + 0.0          | 2716.5 + 2347.8*      |
|                               |               |             |                 |        | 3319.9 + 16.5        | <b>3737.2 + 88.1</b> | 3446.6 + 88.3         | 3017.1 + 543.9*       | 3374.6 + 36.8   | 2144.8 + 433.4*       | -599.4 + 0.0*         |
| HalfCheetah-M-10 <sup>2</sup> | 12284         | 6027        | 5568            | -298   | 5857.0 + 99.2        | 5134.3 + 183.9*      | 5573.8 + 127.2*       | 6190.7 + 50.5         | 3126.8 + 73.8*  | 6285.0 + 626.1        | <b>7635.4 + 65.6</b>  |
|                               |               |             |                 |        | 5776.8 + 0.0         | 1209.8 + 990.1*      | 4005.1 + 0.0*         | 2820.9 + 455.6*       | 1864.1 + 160.4* | 5627.0 + 0.0*         | <b>6259.0 + 51.1</b>  |
|                               |               |             |                 |        | 5930.3 + 94.0        | 5103.6 + 154.7*      | 5468.6 + 275.8*       | 4759.8 + 1433.4*      | 2811.5 + 589.7* | 5208.7 + 1408.9*      | <b>6227.9 + 166.5</b> |
| HalfCheetah-M-10 <sup>3</sup> | 12284         | 6027        | 5568            | -298   | 5866.8 + 73.6        | 6062.8 + 12.1        | 6092.3 + 47.9         | 6576.2 + 39.1         | 5137.8 + 328.7* | 6666.9 + 382.6        | <b>7534.7 + 134.7</b> |
|                               |               |             |                 |        | 5929.3 + 0.0         | 5032.2 + 662.2*      | 3273.8 + 0.0*         | 2139.0 + 0.0*         | 3123.3 + 847.9* | <b>6867.6 + 0.0</b>   | 4346.6 + 3498.3*      |
|                               |               |             |                 |        | 5859.5 + 67.9        | 5373.6 + 905.3*      | 6112.1 + 55.3         | 5829.2 + 447.8*       | 2372.4 + 29.5*  | 4075.6 + 1906.1*      | <b>6667.8 + 214.9</b> |
| HalfCheetah-M-10 <sup>4</sup> | 12284         | 6027        | 5568            | -298   | 5995.9 + 51.3        | 5944.6 + 111.2*      | 6091.5 + 20.3         | 6723.2 + 115.0        | 5243.8 + 220.1* | <b>6724.1 + 402.2</b> | 5195.4 + 108.5*       |
|                               |               |             |                 |        | 5975.5 + 0.0         | 3603.8 + 133.1*      | 3938.6 + 778.1*       | <b>6647.5 + 196.8</b> | 2906.2 + 56.6*  | 5489.9 + 1224.0*      | 5394.7 + 106.4*       |
|                               |               |             |                 |        | 5945.8 + 0.0         | 4914.9 + 1077.1*     | 6104.5 + 3.5          | 5251.7 + 402.2*       | 4984.2 + 0.0*   | <b>6715.5 + 0.0</b>   | -592.1 + 0.0*         |
| HalfCheetah-H-10 <sup>2</sup> | 12284         | 9020        | 7836            | -298   | 5645.0 + 4006.5      | 6945.7 + 386.8       | 7781.0 + 87.9         | <b>9011.7 + 194.0</b> | 2715.7 + 201.8* | 3352.0 + 2859.2*      | 5715.2 + 1026.3       |
|                               |               |             |                 |        | <b>8459.3 + 0.0</b>  | 5727.7 + 0.0*        | 1760.3 + 416.0*       | -92.0 + 54.9*         | 824.7 + 983.2*  | 5640.9 + 0.0*         | 229.5 + 104.6*        |
|                               |               |             |                 |        | <b>8471.8 + 17.6</b> | 3305.6 + 2519.3*     | 5220.5 + 2700.7*      | 2452.9 + 3507.6*      | 1763.7 + 702.9* | 3034.8 + 2353.1*      | 2707.6 + 2313.5*      |
| HalfCheetah-H-10 <sup>3</sup> | 12284         | 9020        | 7836            | -298   | 8676.5 + 59.5        | 8811.9 + 44.0        | 9019.3 + 105.3        | <b>9440.0 + 166.5</b> | 7569.2 + 236.6* | 6591.6 + 2151.4*      | 7994.1 + 1300.5*      |
|                               |               |             |                 |        | <b>8721.3 + 8.4</b>  | 1929.2 + 0.0*        | 3597.3 + 241.8*       | -270.8 + 15.8*        | 869.8 + 0.0*    | 7131.3 + 1045.9*      | 137.5 + 533.6*        |
|                               |               |             |                 |        | 8727.2 + 0.0         | 8161.5 + 430.1*      | <b>9092.7 + 106.8</b> | -5.6 + 129.0*         | 3223.0 + 736.0* | 3402.1 + 318.6*       | 1086.3 + 302.3*       |
| HalfCheetah-H-10 <sup>4</sup> | 12284         | 9020        | 7836            | -298   | 8099.6 + 344.7       | 8918.9 + 181.1       | 9192.9 + 74.3         | <b>9413.0 + 109.3</b> | 8459.1 + 55.0   | 1671.5 + 357.7*       | 657.0 + 797.0*        |
|                               |               |             |                 |        | <b>8378.9 + 0.0</b>  | 2780.4 + 0.0*        | 2061.8 + 590.8*       | -129.8 + 0.0*         | 2891.7 + 68.6*  | 3007.2 + 0.0*         | -148.9 + 0.0*         |
|                               |               |             |                 |        | 8306.1 + 0.0         | 6264.1 + 2707.3*     | <b>9101.3 + 0.0</b>   | 8526.8 + 435.2        | 8448.9 + 46.3   | 1178.6 + 419.9*       | -594.1 + 0.0*         |



Table 34: Raw score for Hopper tasks. For each task, three lines indicate the results of online evaluation, FQE evaluation, WIS evaluation respectively. Bold numbers indicate the best result for each task, while numbers marked by \* indicate results worse than BC. The task name is composed of the specific task, the quality of dataset, and the number of trajectories. L, M, and H stands for low, medium, high respectively. Det. is abbreviation of deterministic.

| Task Name                | Expert Policy | Det. Policy | Behavior Policy | Random | BC                                                             | BCQ                                                  | PLAS                                                | CQL                                                                     | CRR                                                         | BREMEN                                              | MOPO                                           |
|--------------------------|---------------|-------------|-----------------|--------|----------------------------------------------------------------|------------------------------------------------------|-----------------------------------------------------|-------------------------------------------------------------------------|-------------------------------------------------------------|-----------------------------------------------------|------------------------------------------------|
| Hopper-L-10 <sup>2</sup> | 3294          | 508         | 498             | 5      | 533.4 + 21.1<br><b>533.4 + 21.1</b><br>533.4 + 21.1            | 509.6 + 11.3*<br>370.6 + 73.6*<br>403.6 + 0.0*       | 518.6 + 8.4*<br>234.0 + 190.2*<br>328.0 + 94.6*     | <b>548.9 + 15.4</b><br>499.5 + 9.0*<br>528.4 + 25.1*                    | 543.8 + 42.9<br>520.9 + 0.5*<br>529.6 + 7.4*                | 511.5 + 31.1*<br>356.4 + 206.4*<br>40.8 + 1.3*      | 169.1 + 200.8*<br>50.3 + 4.2*<br>38.0 + 22.9*  |
|                          | 3294          | 508         | 498             | 5      | 502.6 + 23.1<br>502.6 + 23.1<br>484.8 + 20.1                   | 601.1 + 6.3<br>494.0 + 124.6*<br>578.9 + 31.9        | 638.9 + 52.3<br><b>602.0 + 52.1</b><br>533.8 + 85.0 | 530.7 + 4.0<br>511.3 + 6.5<br>518.5 + 12.8                              | 557.1 + 20.6<br>566.3 + 72.5<br><b>580.0 + 63.0</b>         | <b>708.8 + 250.7</b><br>74.5 + 14.6*<br>47.4 + 5.3* | 209.9 + 101.1*<br>22.1 + 30.8*<br>125.3 + 0.0* |
|                          | 3294          | 508         | 498             | 5      | 513.2 + 11.3<br>519.7 + 12.6<br>522.1 + 9.2                    | 618.8 + 47.4<br>477.1 + 94.6*<br><b>575.4 + 63.0</b> | 578.8 + 48.5<br>498.4 + 37.0*<br>546.7 + 0.0        | 521.3 + 1.1<br>501.1 + 21.7*<br>472.9 + 2.4*                            | <b>693.6 + 142.3</b><br><b>580.9 + 20.4</b><br>538.7 + 50.2 | 507.5 + 50.3*<br>345.9 + 275.6*<br>276.0 + 0.0*     | 248.2 + 75.5*<br>15.6 + 16.9*<br>25.8 + 19.2*  |
| Hopper-M-10 <sup>2</sup> | 3294          | 1530        | 1410            | 5      | 926.1 + 375.9<br>949.9 + 358.0<br>1203.0 + 358.0               | 1350.2 + 50.5<br>695.1 + 513.2*<br>963.2 + 466.2*    | 1648.8 + 112.6<br>1010.4 + 231.1<br>1010.4 + 231.1* | <b>2084.6 + 308.5</b><br><b>1420.4 + 276.1</b><br><b>2302.2 + 270.5</b> | 1370.3 + 323.5<br>984.0 + 36.6<br>1200.6 + 64.5*            | 942.3 + 207.7<br>213.0 + 136.5*<br>199.2 + 78.0*    | 64.2 + 86.1*<br>38.9 + 23.8*<br>80.9 + 77.1*   |
| Hopper-M-10 <sup>3</sup> | 3294          | 1530        | 1410            | 5      | 1692.0 + 894.1<br><b>2344.1 + 863.0</b><br>998.1 + 0.0         | 1573.6 + 364.4*<br>1091.4 + 454.6*<br>1101.8 + 252.9 | 2018.2 + 848.8<br>1068.7 + 222.5*<br>926.4 + 953.9* | <b>2124.8 + 231.8</b><br>1889.7 + 46.9*<br><b>1766.0 + 5.0</b>          | 1576.2 + 346.2*<br>1282.6 + 496.0*<br>1391.0 + 392.5        | 816.5 + 181.7*<br>704.1 + 0.0*<br>704.1 + 0.0*      | 39.0 + 48.8*<br>2.8 + 1.8*<br>4.0 + 0.3*       |
| Hopper-M-10 <sup>4</sup> | 3294          | 1530        | 1410            | 5      | 1794.1 + 486.3<br><b>1873.7 + 0.0</b><br><b>2031.1 + 222.6</b> | 1865.5 + 257.5<br>985.6 + 104.0*<br>1021.4 + 30.4*   | 2075.1 + 560.0<br>474.7 + 0.0*<br>246.7 + 161.3*    | <b>2690.3 + 429.8</b><br>1443.7 + 212.8*<br>1348.1 + 81.9*              | 1620.2 + 73.0*<br>1159.9 + 640.3*<br>156.5 + 0.0*           | 1521.7 + 463.0*<br>499.5 + 92.7*<br>551.2 + 128.3*  | 40.6 + 28.2*<br>3.2 + 0.0*<br>0.1 + 2.2*       |
| Hopper-H-10 <sup>2</sup> | 3294          | 2294        | 1551            | 5      | 1465.0 + 406.9<br>1289.2 + 469.6<br>957.2 + 0.0                | 1179.0 + 213.6*<br>443.4 + 476.6*<br>289.2 + 0.0*    | 1892.9 + 228.4<br>360.2 + 90.8*<br>476.8 + 224.6*   | <b>2298.4 + 282.0</b><br><b>1456.5 + 495.1</b><br><b>1518.6 + 381.1</b> | 2162.6 + 420.6<br>1399.3 + 18.3<br>1266.6 + 537.3           | 941.9 + 381.5*<br>5.1 + 0.3*<br>6.1 + 0.0*          | 253.7 + 277.2*<br>4.9 + 2.1*<br>21.0 + 25.2*   |
| Hopper-H-10 <sup>3</sup> | 3294          | 2294        | 1551            | 5      | 1424.1 + 271.8<br>1424.1 + 271.8<br>1363.5 + 304.3             | 1691.0 + 336.1<br>821.9 + 721.0*<br>876.2 + 19.2*    | 2504.3 + 149.0<br>862.0 + 304.8*<br>796.3 + 53.6*   | <b>2525.1 + 44.0</b><br><b>1713.0 + 762.2</b><br><b>2280.6 + 147.0</b>  | 1813.9 + 65.8<br>458.4 + 122.9*<br>873.6 + 493.5*           | 1082.2 + 475.8*<br>565.8 + 9.7*<br>1040.3 + 511.2*  | 382.1 + 191.3*<br>5.1 + 1.4*<br>6.2 + 1.1*     |
| Hopper-H-10 <sup>4</sup> | 3294          | 2294        | 1551            | 5      | 1633.0 + 464.6<br>1660.2 + 444.2<br>1660.2 + 444.2             | 928.6 + 172.7*<br>437.7 + 595.8*<br>753.3 + 0.0*     | 2178.1 + 330.4<br>894.7 + 205.5*<br>1339.5 + 509.9* | <b>2690.3 + 239.6</b><br><b>2449.9 + 567.9</b><br><b>2886.6 + 152.1</b> | 2058.1 + 163.5<br>982.0 + 1123.1*<br>1263.4 + 941.0*        | 1560.6 + 898.7*<br>504.3 + 0.0*<br>430.5 + 0.0*     | 191.6 + 258.1*<br>3.5 + 3.1*<br>38.8 + 0.0*    |

Table 35: Raw score for Walker2d tasks. For each task, three lines indicate the results of online evaluation, FQE evaluation, WIS evaluation respectively. Bold numbers indicate the best result for each task, while numbers marked by \* indicate results worse than BC. The task name is composed of the specific task, the quality of dataset, and the number of trajectories. L, M, and H stands for low, medium, high respectively. Det. is abbreviation of deterministic.

| Task Name                  | Expert Policy | Det. Policy | Behavior Policy | Random | BC                    | BCQ                   | PLAS                  | CQL                   | CRR                   | BREMEN           | MOPO             |
|----------------------------|---------------|-------------|-----------------|--------|-----------------------|-----------------------|-----------------------|-----------------------|-----------------------|------------------|------------------|
| Walker2d-L-10 <sup>2</sup> | 5143          | 1572        | 1278            | 1      | 1495.4 + 179.0        | 1144.9 + 17.9*        | 1696.7 + 263.9        | 1558.6 + 52.2         | <b>1870.9 + 248.4</b> | 1121.7 + 1069.9* | 502.2 + 468.2*   |
|                            |               |             |                 |        | <b>1495.4 + 179.0</b> | 1058.0 + 27.5*        | 549.8 + 24.4*         | 839.0 + 656.1*        | 1393.3 + 214.7*       | 176.5 + 149.7*   | 232.1 + 189.9*   |
|                            |               |             |                 |        | <b>1470.1 +- 0.0</b>  | 381.9 + 8.9*          | 539.6 + 126.2*        | 431.8 + 629.3*        | 1457.5 + 372.9*       | 373.3 + 85.7*    | 194.1 + 75.8*    |
| Walker2d-L-10 <sup>3</sup> | 5143          | 1572        | 1278            | 1      | 1466.5 + 99.8         | 1953.6 + 231.6        | 2166.8 + 531.1        | <b>2298.8 + 139.1</b> | 1753.1 + 90.4         | 1667.9 + 449.1   | 599.4 + 725.3*   |
|                            |               |             |                 |        | 1394.7 + 3.5          | 1378.2 + 251.3*       | 855.5 + 1137.9*       | <b>2353.5 + 83.3</b>  | 999.1 + 546.5*        | 453.8 + 255.4*   | 35.9 + 63.2*     |
|                            |               |             |                 |        | 1538.2 + 98.0         | 1508.7 + 511.2*       | 230.4 + 80.0*         | <b>1624.2 + 66.7</b>  | 325.5 + 313.7*        | 639.6 + 247.3*   | 47.2 + 37.2*     |
| Walker2d-L-10 <sup>4</sup> | 5143          | 1572        | 1278            | 1      | 1642.7 + 125.8        | 2010.1 + 186.7        | 1601.7 + 333.4*       | <b>2070.4 + 70.2</b>  | 1710.6 + 373.4        | 1511.7 + 246.3*  | 594.8 + 714.2*   |
|                            |               |             |                 |        | 1681.9 + 0.0          | 1522.6 + 326.1*       | 4.9 + 31.2*           | <b>2008.5 +- 0.0</b>  | 1526.6 + 52.8*        | 71.1 + 22.6*     | -7.5 + 1.5*      |
|                            |               |             |                 |        | 1542.5 + 98.6         | <b>1983.8 +- 0.0</b>  | 71.6 + 80.1*          | 1703.4 + 0.0          | 1561.0 + 568.2        | 126.2 + 61.3*    | -14.6 + 5.5*     |
| Walker2d-M-10 <sup>2</sup> | 5143          | 2547        | 2221            | 1      | 2582.2 + 205.5        | 2159.3 + 53.8*        | 2652.5 + 89.8         | <b>2734.1 + 129.0</b> | 2033.3 + 246.3*       | 1936.4 + 1365.2* | 1036.5 + 796.8*  |
|                            |               |             |                 |        | <b>2582.2 + 205.5</b> | 449.7 + 30.4*         | 1346.3 + 928.2*       | 1912.6 + 477.4*       | 1857.0 + 359.9*       | 789.8 + 575.4*   | 456.7 + 363.8*   |
|                            |               |             |                 |        | 2438.2 + 3.6          | 2028.1 + 147.7*       | <b>2761.9 + 0.0</b>   | 2461.5 + 159.9        | 1724.7 + 389.2*       | 727.8 + 1032.0*  | 24.2 + 62.0*     |
| Walker2d-M-10 <sup>3</sup> | 5143          | 2547        | 2221            | 1      | 2503.3 + 97.9         | <b>3173.7 + 27.8</b>  | 1778.7 + 679.5*       | 2947.7 + 49.7         | 2300.4 + 354.3*       | 1927.8 + 852.2*  | 2051.9 + 104.6*  |
|                            |               |             |                 |        | <b>2448.2 + 109.9</b> | 2435.4 + 534.0*       | -16.0 + 1.3*          | 2356.2 + 30.7*        | 1761.4 + 192.3*       | 157.3 + 22.8*    | 629.8 + 364.7*   |
|                            |               |             |                 |        | 2503.3 + 97.9         | <b>2708.8 + 503.2</b> | -9.4 + 6.8*           | 2501.3 + 402.4*       | 520.6 + 587.4*        | 1264.4 + 725.9*  | -5.5 + 0.0*      |
| Walker2d-M-10 <sup>4</sup> | 5143          | 2547        | 2221            | 1      | 2795.7 + 178.4        | <b>3095.9 + 73.7</b>  | 2444.1 + 77.7*        | 3016.4 + 62.3         | 2816.9 + 126.5        | 2132.7 + 116.2*  | 1642.6 + 1045.4* |
|                            |               |             |                 |        | <b>2886.3 + 75.7</b>  | 2652.3 + 583.5*       | 9.7 + 17.5*           | 556.2 + 327.1*        | 1983.3 + 131.4*       | 516.8 + 74.7*    | 276.4 + 396.9*   |
|                            |               |             |                 |        | 2832.7 + 0.0          | <b>3011.8 + 236.9</b> | 53.8 + 87.0*          | 2413.8 + 200.8*       | 2049.4 + 56.6*        | 977.0 + 797.7*   | 947.1 + 1190.3*  |
| Walker2d-H-10 <sup>2</sup> | 5143          | 3550        | 2936            | 1      | 3299.0 + 252.8        | 2448.0 + 229.6*       | 3376.7 + 30.5         | <b>3822.1 + 14.2</b>  | 761.1 + 311.6*        | 1250.8 + 1642.4* | 1195.7 + 185.7*  |
|                            |               |             |                 |        | 3448.4 + 280.0        | 1001.8 + 811.0*       | 245.0 + 233.5*        | <b>3776.1 + 58.6</b>  | 595.9 + 213.9*        | 173.9 + 0.0*     | 763.5 + 496.5*   |
|                            |               |             |                 |        | 3149.5 + 68.7         | 1970.6 + 647.6*       | <b>3382.6 +- 25.5</b> | 3065.4 + 201.9*       | 622.5 + 195.9*        | 337.0 + 226.0*   | 595.8 + 146.1*   |
| Walker2d-H-10 <sup>3</sup> | 5143          | 3550        | 2936            | 1      | 3736.5 + 213.8        | <b>3939.4 + 146.1</b> | 2930.5 + 480.9*       | 3870.9 + 95.7         | 3453.2 + 495.2*       | 2470.9 + 1057.8* | 924.0 + 153.6*   |
|                            |               |             |                 |        | <b>3826.0 +- 0.0</b>  | 3583.9 + 369.1*       | -15.7 + 0.5*          | 1703.1 + 637.6*       | 2975.7 + 581.1*       | 935.4 + 471.2*   | -8.5 + 1.9*      |
|                            |               |             |                 |        | 3697.9 + 181.2        | <b>3743.3 + 89.3</b>  | 1101.2 + 1582.8*      | 3132.0 + 520.0*       | 3187.1 + 566.9*       | 1684.3 + 842.9*  | -10.6 + 0.0*     |
| Walker2d-H-10 <sup>4</sup> | 5143          | 3550        | 2936            | 1      | 3000.9 + 429.7        | <b>4007.1 + 71.1</b>  | 1866.3 + 230.8*       | 3850.6 + 42.5         | 3685.9 + 361.3        | 2470.3 + 487.2*  | 910.4 + 43.5*    |
|                            |               |             |                 |        | <b>3093.5 + 479.9</b> | 2655.0 + 838.8*       | 76.8 + 130.9*         | 2217.5 + 1026.9*      | 767.0 + 1088.1*       | 236.5 + 195.2*   | 65.6 + 168.8*    |
|                            |               |             |                 |        | 3432.9 + 0.0          | <b>4078.7 +- 3.0</b>  | 93.3 + 0.0*           | 3806.9 + 66.0         | 3796.7 + 413.2        | 98.4 + 0.0*      | 401.2 + 386.0*   |

Table 36: Raw score for IB tasks. For each task, three lines indicate the results of online evaluation, FQE evaluation, WIS evaluation respectively. Bold numbers indicate the best result for each task, while numbers marked by \* indicate results worse than BC. The task name is composed of the specific task, the quality of dataset, and the number of trajectories. L, M, and H stands for low, medium, high respectively. Det. is abbreviation of deterministic.

| Task Name            | Expert Policy | Det. Policy | Behavior Policy | Random  | BC                                                                      | BCQ                                                                   | PLAS                                                                      | CQL                                                                        | CRR                                                                                | BREMEN                                                                    | MOPO                                                                    |
|----------------------|---------------|-------------|-----------------|---------|-------------------------------------------------------------------------|-----------------------------------------------------------------------|---------------------------------------------------------------------------|----------------------------------------------------------------------------|------------------------------------------------------------------------------------|---------------------------------------------------------------------------|-------------------------------------------------------------------------|
| IB-L-10 <sup>2</sup> | -180240       | -344311     | -344311         | -317624 | -344761.7 + 2189.9<br>-344010.5 + 2518.4<br><b>-344010.5 + 2518.4</b>   | -712660.8 + 213594.5*<br>-410980.4 + 0.0*<br>-882595.2 + 159.0*       | -365620.4 + 32376.3*<br>-411022.0 + 54.0*<br>-568695.2 + 223249.5*        | <b>-314124.0 + 4338.2</b><br>-40726.1 + 0.0*<br>-523939.1 + 221024.0*      | -324878.5 + 19785.4<br><b>-342228.8 + 5426.2</b><br>-528695.9 + 249141.0*          | -365081.2 + 33973.5*<br>-2514183.4 + 0.0*<br>-450899.9 + 61330.4*         | -566237.9 + 223483.5*<br>-2658538.0 + 628.8*<br>-648459.8 + 192663.8*   |
| IB-L-10 <sup>3</sup> | -180240       | -344311     | -344311         | -317624 | -339937.4 + 3645.8<br><b>-337435.8 + 207.1</b><br>-345087.1 + 0.0       | -561099.6 + 213072.1*<br>-411067.4 + 380.0*<br>-411336.1 + 380.0*     | -359489.8 + 36380.4*<br>-411180.5 + 30.6*<br>-411180.5 + 30.6*            | <b>-318117.5 + 6148.1</b><br>-391534.8 + 38114.8*<br>-563498.4 + 192211.8* | -324936.1 + 23527.7<br>-347386.4 + 13984.6*<br><b>-337748.6 + 25050.1</b>          | -368816.0 + 29642.4*<br>-344129.4 + 8507.8*<br>-707684.5 + 0.0*           | -542129.0 + 244107.3*<br>-2658827.7 + 367.7*<br>-1909782.3 + 1060017.9* |
| IB-L-10 <sup>4</sup> | -180240       | -344311     | -344311         | -317624 | -343210.4 + 4055.4<br><b>-348684.4 + 0.0</b><br>-342222.6 + 4569.2      | -561638.9 + 213473.5*<br>-411269.4 + 108.5*<br>-410884.1 + 266.8*     | -518946.1 + 258148.7*<br>-411215.8 + 331.2*<br>-568326.4 + 223146.3*      | -326129.3 + 19145.8<br>-503697.6 + 136754.9*<br><b>-312506.4 + 3855.2</b>  | <b>-319686.8 + 16332.2</b><br>-383450.3 + 29621.1*<br>-341559.8 + 0.0              | -486088.4 + 63556.2*<br>-456833.6 + 31807.7*<br>-411850.7 + 0.0*          | -553469.5 + 235120.3*<br>-1909064.2 + 1059572.7*<br>-320385.5 + 0.0     |
| IB-M-10 <sup>2</sup> | -180240       | -283121     | -283121         | -317624 | -330246.8 + 64458.5<br>-292685.3 + 0.0<br><b>-282292.2 + 7349.0</b>     | -561785.5 + 213250.4*<br>-410883.0 + 134.2*<br>-568506.2 + 222892.9*  | -718368.5 + 220349.4*<br>-568521.1 + 222562.0*<br>-726813.5 + 223210.8*   | -284143.4 + 6669.0<br>-355898.0 + 29505.0*<br>-490209.9 + 256942.6*        | <b>-282481.3 + 5208.6</b><br><b>-288604.9 + 0.0</b><br>-321847.6 + 57271.1*        | -451975.5 + 143006.8*<br>-797642.7 + 0.0*<br>-612565.6 + 432657.5*        | -399812.5 + 7797.9*<br>-626245.1 + 193554.9*<br>-1159253.2 + 1059689.4* |
| IB-M-10 <sup>3</sup> | -180240       | -283121     | -283121         | -317624 | -280375.7 + 558.5<br><b>-281093.4 + 0.0</b><br><b>-280112.1 + 269.3</b> | -567089.1 + 221151.5*<br>-410678.6 + 299.6*<br>-726046.4 + 222700.2*  | -568661.4 + 222473.2*<br>-410490.8 + 0.0*<br>-883615.3 + 466.0*           | -283066.3 + 2155.5*<br>-643440.7 + 0.0*<br>-2624408.2 + 1612.8*            | <b>-277867.7 + 4022.3</b><br>-305740.2 + 0.0*<br>-280204.8 + 2035.2*               | -339595.9 + 44727.3*<br>-602386.8 + 160945.3*<br>-312046.3 + 2035.2*      | -481452.0 + 117723.5*<br>-410133.7 + 41.9*<br>-486741.5 + 110201.3*     |
| IB-M-10 <sup>4</sup> | -180240       | -283121     | -283121         | -317624 | -279500.8 + 3683.9<br>-277271.0 + 895.8<br>-280134.2 + 3153.4           | -566925.8 + 224088.0*<br>-410798.5 + 151.7*<br>-410605.6 + 412.9*     | -568501.1 + 222914.8*<br>-410619.4 + 0.0*<br>-410619.4 + 0.0*             | -280729.5 + 8810.7*<br>-394629.5 + 17923.3*<br>-337979.7 + 44268.3*        | <b>-275867.2 + 599.8</b><br><b>-274633.4 + 0.0</b><br><b>-278415.0 + 3797.9</b>    | -315430.2 + 25323.7*<br>-279422.7 + 454.7*<br>-861522.7 + 0.0*            | -384687.7 + 35961.9*<br>-2658889.2 + 0.0*<br>-2658889.2 + 0.0*          |
| IB-H-10 <sup>2</sup> | -180240       | -220156     | -220156         | -317624 | -238255.2 + 41897.6<br><b>-218726.7 + 0.0</b><br>-231870.5 + 45676.1    | -714139.4 + 105782.0*<br>-1474776.7 + 836850.3*<br>-649128.2 + 328.8* | -562798.2 + 107829.8*<br>-569125.3 + 222954.3*<br>-1134395.0 + 1023028.0* | -272439.9 + 37056.6*<br>-510704.8 + 263728.2*<br>-352046.2 + 93275.8*      | <b>-217115.0 + 173.9</b><br><b>-217558.2 + 172.2</b><br><b>-217558.2 + 172.2</b>   | -440008.5 + 149038.2*<br>-1766974.5 + 628919.3*<br>-1432446.8 + 955206.6* | -423373.3 + 96169.4*<br>-687799.3 + 200914.1*<br>-477191.2 + 106725.4*  |
| IB-H-10 <sup>3</sup> | -180240       | -220156     | -220156         | -317624 | -304761.7 + 120946.8<br>-361090.7 + 107008.9<br>-446940.8 + 40816.6     | -726915.6 + 110848.7*<br>-864952.4 + 0.0*<br>-649403.4 + 0.0*         | -553143.3 + 201107.2*<br>-411240.4 + 282.5*<br>-726668.3 + 110379.9*      | -296295.2 + 67178.7<br>-545224.5 + 118751.8*<br>-1108589.6 + 455436.8*     | <b>-221840.5 + 152.2</b><br><b>-221950.0 + 0.0</b><br><b>-218444.2 + 652.3</b>     | -360952.6 + 155810.4*<br>-475409.2 + 116752.7*<br>-1891941.4 + 944473.7*  | -451568.8 + 123100.2*<br>-535490.3 + 157894.3*<br>-646042.5 + 4369.4*   |
| IB-H-10 <sup>4</sup> | -180240       | -220156     | -220156         | -317624 | -364645.1 + 152919.1<br>-330487.1 + 171238.7<br>-572655.2 + 0.0         | -569215.6 + 111876.4*<br>-883653.4 + 0.0*<br>-648956.2 + 912.7*       | -571397.9 + 112758.7*<br>-883833.5 + 173.4*<br>-647685.7 + 0.0*           | -270589.9 + 46831.4<br>-497089.6 + 122231.0*<br>-1994869.7 + 936859.5*     | <b>-232892.3 + 21416.0</b><br><b>-248358.5 + 20928.1</b><br><b>-263156.9 + 0.0</b> | -325249.6 + 15788.0<br>-334297.7 + 6358.7*<br>-317105.0 + 0.0             | -492383.6 + 116498.6*<br>-742097.7 + 186183.2*<br>-648666.8 + 0.0*      |

Table 37: Raw score for FinRL tasks. For each task, three lines indicate the results of online evaluation, FQE evaluation, WIS evaluation respectively. Bold numbers indicate the best result for each task, while numbers marked by \* indicate results worse than BC. The task name is composed of the specific task, the quality of dataset, and the number of trajectories. L, M, and H stands for low, medium, high respectively. Det. is abbreviation of deterministic.

| Task Name               | Expert Policy | Det. Policy | Behavior Policy | Random | BC                  | BCQ           | PLAS                 | CQL                  | CRR           | BREMEN               | MOPO           |
|-------------------------|---------------|-------------|-----------------|--------|---------------------|---------------|----------------------|----------------------|---------------|----------------------|----------------|
| FinRL-L-10 <sup>2</sup> | 631           | 150         | 152             | 206    | 353.8 + 256.0       | 304.8 + 33.5* | 308.9 + -17.7*       | <b>411.3 + 15.0</b>  | 237.8 + -4.4* | 354.0 + 256.3        | 285.2 + -24.2* |
|                         |               |             |                 |        | 365.5 + 247.4       | 346.0 + -5.9* | 308.9 + 17.7*        | 335.1 + -72.5*       | 234.6 + 0.1*  | <b>715.6 + 0.3</b>   | 285.0 + -24.3* |
|                         |               |             |                 |        | 353.8 + 256.0       | 320.0 + 38.1* | 309.5 + 20.8*        | 415.8 + 20.7         | 203.5 + 44.2* | <b>540.8 + 247.7</b> | 286.0 + -23.2* |
| FinRL-L-10 <sup>3</sup> | 631           | 150         | 152             | 206    | 286.2 + 42.6        | 335.2 + -28.7 | 471.9 + 85.5         | <b>487.5 + 9.8</b>   | 310.8 + 52.1  | 425.6 + 210.5        | 280.8 + -27.7* |
|                         |               |             |                 |        | 255.4 + -41.6       | 363.3 + 8.7   | <b>518.8 + 107.4</b> | 441.7 + 63.7         | 274.3 + 4.4   | 247.0 + -6.0*        | 275.7 + 33.1   |
|                         |               |             |                 |        | 317.1 + 2.0         | 353.5 + -19.6 | <b>446.8 + 103.3</b> | 256.5 + -40.4*       | 317.6 + -44.6 | 298.1 + -14.4*       | 264.9 + 7.8*   |
| FinRL-M-10 <sup>2</sup> | 631           | 300         | 357             | 206    | 534.7 + 316.5       | 296.7 + 7.7*  | 346.8 + 83.2*        | <b>563.8 + 118.0</b> | 364.2 + 40.3* | 534.7 + 316.5        | 295.6 + -26.2* |
|                         |               |             |                 |        | 478.3 + 348.8       | 291.5 + 5.8*  | 308.9 + 95.0*        | <b>511.2 + 157.8</b> | 310.5 + 46.4* | 231.6 + 0.0*         | 312.9 + 25.2*  |
|                         |               |             |                 |        | 534.7 + 316.5       | 293.1 + 9.3*  | 331.6 + 86.3*        | 359.7 + 72.1*        | 289.5 + 53.5* | <b>639.8 + 306.9</b> | 303.5 + -19.3* |
| FinRL-M-10 <sup>3</sup> | 631           | 300         | 357             | 206    | 233.2 + -41.3       | 329.8 + -61.7 | 422.2 + 53.7         | 448.0 + -109.3       | 346.4 + -39.4 | <b>844.8 + 425.0</b> | 293.0 + -25.2  |
|                         |               |             |                 |        | 211.8 + 16.9        | 359.7 + -44.3 | 256.2 + 64.3         | 340.9 + 99.1         | 288.4 + 93.4  | <b>577.7 + 292.2</b> | 311.5 + 24.2   |
|                         |               |             |                 |        | 266.5 + -30.2       | 340.2 + -51.1 | 386.2 + 77.0         | 371.5 + 123.5        | 300.5 + 94.2  | <b>837.2 + 435.3</b> | 283.1 + 33.9   |
| FinRL-H-10 <sup>2</sup> | 631           | 441         | 419             | 206    | 412.1 + 111.4       | 276.7 + 83.6* | 384.5 + 117.3*       | 450.8 + 114.8        | 389.7 + 86.2* | <b>506.1 + 271.7</b> | 290.3 + -25.5* |
|                         |               |             |                 |        | <b>503.1 + 62.2</b> | 207.7 + 38.6* | 383.7 + 66.9*        | 413.6 + -59.5*       | 271.3 + 59.7* | 229.9 + 31.9*        | 277.2 + 7.7*   |
|                         |               |             |                 |        | 365.1 + 128.6       | 247.2 + 76.4* | 303.5 + 123.5*       | 332.7 + 15.7*        | 259.8 + 6.1*  | <b>456.2 + 128.5</b> | 277.2 + 7.7*   |
| FinRL-H-10 <sup>3</sup> | 631           | 441         | 419             | 206    | 266.3 + 113.3       | 300.7 + 84.1  | 430.7 + 68.4         | 424.3 + 86.5         | 358.5 + -97.9 | <b>502.8 + 280.1</b> | 287.7 + 29.2   |
|                         |               |             |                 |        | 323.2 + 129.5       | 290.9 + 75.7* | <b>402.2 + 8.3</b>   | 397.3 + 5.5          | 352.2 + 83.8  | 231.6 + 130.2*       | 273.6 + -12.3* |
|                         |               |             |                 |        | 209.3 + -48.9       | 288.3 + -77.5 | <b>407.9 + 48.5</b>  | 317.7 + 21.6         | 322.6 + 73.3  | 345.5 + 143.7        | 312.8 + -18.5  |

Table 38: Raw score for CL tasks. For each task, three lines indicate the results of online evaluation, FQE evaluation, WIS evaluation respectively. Bold numbers indicate the best result for each task, while numbers marked by \* indicate results worse than BC. The task name is composed of the specific task, the quality of dataset, and the number of trajectories. L, M, and H stands for low, medium, high respectively. Det. is abbreviation of deterministic.

| Task Name            | Expert Policy | Det. Policy | Behavior Policy | Random | BC                      | BCQ               | PLAS               | CQL                     | CRR                     | BREMEN                  | MOPO             |
|----------------------|---------------|-------------|-----------------|--------|-------------------------|-------------------|--------------------|-------------------------|-------------------------|-------------------------|------------------|
| CL-L-10 <sup>2</sup> | 50350         | 28500       | 29514           | 16280  | 26603.8 + 3453.2        | 22179.4 + 1237.0* | 28246.0 + 1170.6   | 29928.2 + 478.7         | <b>31525.3 + 279.7</b>  | 25749.4 + 3234.2*       | 19961.2 + 550.7* |
|                      |               |             |                 |        | 22052.9 + 0.0           | 23207.1 + 348.2   | 20456.1 + 0.0*     | 23673.5 + 0.0           | <b>30684.6 + 909.3</b>  | 22287.6 + 152.9         | 19488.7 + 489.8* |
|                      |               |             |                 |        | 24839.8 + 3941.2        | 22179.4 + 1237.0* | 26659.8 + 2475.5   | 27187.2 + 2653.9        | <b>29799.5 + 1142.3</b> | 21778.2 + 512.5*        | 19765.2 + 193.8* |
| CL-L-10 <sup>3</sup> | 50350         | 28500       | 29514           | 16280  | 29439.4 + 614.6         | 24786.0 + 484.9*  | 28482.5 + 863.4*   | <b>32265.3 + 500.3</b>  | 30334.9 + 670.7         | 29935.4 + 449.6         | 19957.8 + 562.9* |
|                      |               |             |                 |        | 28997.7 + 20.9          | 23983.1 + 254.7*  | 24920.0 + 0.0*     | <b>29672.8 + 16.9</b>   | 29557.3 + 1126.9        | 28706.8 + 1566.6*       | 20261.9 + 106.4* |
|                      |               |             |                 |        | 29439.4 + 614.6         | 24098.2 + 1295.0* | 25537.9 + 873.9*   | <b>29488.9 + 921.6</b>  | 29112.3 + 196.2*        | 27842.5 + 1684.8*       | 20159.0 + 167.8* |
| CL-L-10 <sup>4</sup> | 50350         | 28500       | 29514           | 16280  | 29345.4 + 522.6         | 23627.0 + 266.5*  | 28845.1 + 1410.7*  | <b>32079.7 + 572.1</b>  | 30869.8 + 263.6         | 29747.4 + 352.2         | 19980.0 + 872.8* |
|                      |               |             |                 |        | 29345.4 + 522.6         | 24133.2 + 150.9*  | 23795.0 + 0.0*     | <b>30504.8 + 174.5</b>  | 29177.7 + 80.3*         | 29186.0 + 269.5*        | 19582.4 + 0.0*   |
|                      |               |             |                 |        | 29345.4 + 522.6         | 23060.6 + 890.4*  | 25988.5 + 3102.1*  | <b>30066.9 + 0.0</b>    | 29874.1 + 1145.4        | 29328.3 + 68.2*         | 18983.9 + 42.2*  |
| CL-M-10 <sup>2</sup> | 50350         | 37800       | 36900           | 16280  | 39546.5 + 1922.6        | 26460.1 + 3564.4* | 35682.4 + 1315.7*  | 39054.2 + 1726.5*       | <b>44500.7 + 300.4</b>  | 37947.5 + 4318.3*       | 19731.3 + 881.1* |
|                      |               |             |                 |        | 38794.9 + 1156.5        | 22792.6 + 137.6*  | 30986.0 + 7513.9*  | 31677.2 + 3720.2*       | <b>41893.8 + 2028.6</b> | 24715.6 + 2688.8*       | 19314.4 + 786.7* |
|                      |               |             |                 |        | 40364.2 + 1062.9        | 24541.9 + 1225.4* | 25772.6 + 5832.2*  | 27561.4 + 2285.6*       | <b>41684.7 + 2741.3</b> | 31941.2 + 4602.8*       | 19460.4 + 146.0* |
| CL-M-10 <sup>3</sup> | 50350         | 37800       | 36900           | 16280  | 37863.2 + 2738.8        | 24598.1 + 1188.5* | 36195.6 + 2107.8*  | 41820.2 + 216.7         | 41549.5 + 399.4         | <b>42765.6 + 4271.8</b> | 19945.1 + 466.5* |
|                      |               |             |                 |        | 35839.0 + 2595.3        | 23173.8 + 239.6*  | 28364.7 + 6063.1*  | 36102.6 + 234.3         | 41801.4 + 323.7         | <b>42235.7 + 4646.5</b> | 19357.5 + 39.0*  |
|                      |               |             |                 |        | 39509.3 + 0.0           | 24550.7 + 320.2*  | 37189.0 + 1722.1*  | <b>41586.1 + 1138.1</b> | 40198.9 + 1005.7        | 40182.1 + 776.7         | 19357.6 + 86.2*  |
| CL-M-10 <sup>4</sup> | 50350         | 37800       | 36900           | 16280  | 36507.0 + 5368.8        | 23803.5 + 2241.1* | 35587.0 + 986.1*   | <b>42531.8 + 491.7</b>  | 41974.6 + 220.7         | 36273.5 + 6371.8*       | 19730.2 + 483.8* |
|                      |               |             |                 |        | 28916.8 + 0.0           | 20727.4 + 0.0*    | 35124.8 + 2424.5   | 37025.2 + 898.6         | <b>41922.7 + 248.1</b>  | 21555.0 + 116.2*        | 20010.3 + 286.8* |
|                      |               |             |                 |        | 40136.7 + 0.0           | 20707.9 + 0.0*    | 30467.8 + 7399.4*  | 39241.9 + 3200.9*       | <b>40959.7 + 631.3</b>  | 31854.5 + 7296.1*       | 18761.1 + 247.4* |
| CL-H-10 <sup>2</sup> | 50350         | 48600       | 48818           | 16280  | 53943.8 + 2305.0        | 27062.8 + 4698.8* | 46322.6 + 1994.3*  | 50611.7 + 827.5*        | <b>56935.0 + 1635.5</b> | 54739.3 + 2173.2        | 20322.5 + 268.4* |
|                      |               |             |                 |        | 52089.0 + 1702.4        | 20468.1 + 44.3*   | 24629.8 + 360.3*   | 33029.6 + 2574.9*       | 53586.0 + 3431.2        | <b>56282.5 + 279.6</b>  | 19742.5 + 337.8* |
|                      |               |             |                 |        | <b>53943.8 + 2305.0</b> | 26627.1 + 1246.0* | 39026.6 + 10330.9* | 41502.8 + 9248.0*       | 53671.2 + 4224.4*       | 44156.9 + 15029.4*      | 19668.0 + 299.3* |
| CL-H-10 <sup>3</sup> | 50350         | 48600       | 48818           | 16280  | 52621.9 + 555.1         | 29071.0 + 3907.4* | 47516.9 + 3168.9*  | 51960.6 + 1946.3*       | <b>55180.4 + 755.5</b>  | 54011.1 + 1307.0        | 19657.1 + 249.5* |
|                      |               |             |                 |        | <b>53086.4 + 0.0</b>    | 25137.9 + 104.7*  | 23338.1 + 41.2*    | 45099.0 + 1422.0*       | 51928.8 + 1319.2*       | 42022.7 + 3099.3*       | 19078.0 + 97.6*  |
|                      |               |             |                 |        | 52256.5 + 586.8         | 25720.6 + 760.1*  | 44729.5 + 7872.6*  | 51239.6 + 1716.9*       | <b>53003.4 + 910.1</b>  | 52480.2 + 1764.7        | 19191.3 + 153.2* |
| CL-H-10 <sup>4</sup> | 50350         | 48600       | 48818           | 16280  | 49844.1 + 4217.6        | 3323.4 + 6191.3*  | 47798.9 + 2952.2*  | 52814.9 + 2485.0        | <b>54777.5 + 968.6</b>  | 43514.7 + 15253.5*      | 19954.6 + 915.1* |
|                      |               |             |                 |        | 46893.9 + 4261.5        | 32175.5 + 401.8*  | 22587.6 + 0.0*     | 39742.9 + 166.3*        | <b>54268.7 + 0.0</b>    | 22785.9 + 238.8*        | 19658.0 + 0.0*   |
|                      |               |             |                 |        | 52920.5 + 0.0           | 39473.3 + 544.8*  | 49472.0 + 168.6*   | 50544.4 + 1591.3*       | <b>54896.1 + 1371.4</b> | 48462.3 + 8717.9*       | 19276.6 + 122.3* |

Table 39: Raw score for the SP task. Policies are measured by their episode return averaged over 3 episodes. Bold numbers indicate the best result for each task, while numbers marked by \* indicate results worse than BC. The task name is composed of the specific task, the quality of dataset, and the number of trajectories. Det. is abbreviation of deterministic.

| Task Name                | Expert Policy | Det. Policy | Behavior Policy | Random | BC            | BCQ            | PLAS                  | CQL                 | CRR            | BREMEN         | MOPO           |
|--------------------------|---------------|-------------|-----------------|--------|---------------|----------------|-----------------------|---------------------|----------------|----------------|----------------|
| SP-human-10 <sup>4</sup> | 864           | 610         | 610             | 587    | 466.0 +- 12.7 | 836.2 +- 0.0   | <b>893.0 +- 20.9</b>  | 740.5 +- 122.1      | 636.2 +- 118.0 | 477.0 +- 24.7  | 728.2 +- 289.4 |
|                          |               |             |                 |        | 466.0 +- 12.7 | 822.7 +- 0.0   | 506.0 +- 0.1          | <b>822.9 +- 0.0</b> | 503.8 +- 69.6  | 418.2 +- 85.9* | 822.9 +- 0.0   |
|                          |               |             |                 |        | 457.1 +- 0.3  | 705.6 +- 165.7 | <b>790.0 +- 200.8</b> | 430.1 +- 97.8*      | 581.8 +- 121.8 | 458.3 +- 2.7   | 378.7 +- 59.5* |
